# Supplementary material for: Chemical constituents from a marine medicinal brown alga-derived Xylaria acuta SC1019
Source: PubMed Central journal article supplement — J Food Drug Anal. 2024 Jun 15;32(2):155–67. doi: 10.38212/2224-6614.3501 (PMC11210469; doi:10.38212/2224-6614.3501), 2024-06-15
Supplement: jfda-32-02-155-s001.pdf [file jfda-32-02-155-s001.pdf]

---

## *Research Highlights*

---

- A marine medicinal brown alga-derived fungal strain *Xylaria acuta* SC1019 was isolated.
- Nine previously unreported chemical entities were isolated and identified from the fermented products.
- The anti-inflammatory and anti-angiogenic activities of all the isolates were evaluated.
