# Supplementary material for: Chemical constituents from a marine medicinal brown alga-derived Xylaria acuta SC1019
Source: PubMed Central journal article supplement — J Food Drug Anal. 2024 Jun 15;32(2):155–67. doi: 10.38212/2224-6614.3501 (PMC11210469; doi:10.38212/2224-6614.3501), 2024-06-15
Supplement: jfda-32-02-155-s002.pdf [file jfda-32-02-155-s002.pdf]

**Supporting Information**  
**For**

**Chemical Constituents from a Marine Medicinal Brown Alga-  
Derived *Xylaria acuta* SC1019**

Hsiao-Yang Hsi <sup>a</sup>, Shih-Wei Wang <sup>b,c,d</sup>, George Hsiao <sup>e</sup>, Li-Kwan Chang <sup>f</sup>, Yuan-  
Chung Cheng <sup>g</sup>, Shu-Jung Huang <sup>a</sup>, Yi-Shan Lu <sup>f</sup>, Tzong-Huei Lee <sup>a,\*</sup>

<sup>a</sup> *Institute of Fisheries Science, National Taiwan University, Taipei 106, Taiwan*

<sup>b</sup> *Institute of Biomedical Sciences, MacKay Medical College, New Taipei City 252,  
Taiwan*

<sup>c</sup> *Department of Medicine, MacKay Medical College, New Taipei City 252, Taiwan*

<sup>d</sup> *Graduate Institute of Natural Products, College of Pharmacy, Kaohsiung Medical  
University, Kaohsiung 807, Taiwan*

<sup>e</sup> *Graduate Institute of Medical Sciences and Department of Pharmacology, School of  
Medicine, College of Medicine, Taipei 110, Taiwan*

<sup>f</sup> *Department of Biochemical Science and Technology, College of Life Science,  
National Taiwan University, Taipei 106, Taiwan*

<sup>g</sup> *Department of Chemistry and Center for Quantum Science and Engineering,  
National Taiwan University, Taipei 106, Taiwan*

\* Corresponding author.

E-mail address: [thlee1@ntu.edu.tw](mailto:thlee1@ntu.edu.tw) (T.-H. Lee)

## Table of Contents

|                                                                                                                   |    |
|-------------------------------------------------------------------------------------------------------------------|----|
| <b>Figure S1.</b> The $^1\text{H}$ NMR (600 MHz, $\text{CD}_3\text{OD}$ ) spectrum of compound <b>1</b> .....     | 5  |
| <b>Figure S2.</b> The $^{13}\text{C}$ NMR (150 MHz, $\text{CD}_3\text{OD}$ ) spectrum of compound <b>1</b> .....  | 5  |
| <b>Figure S3.</b> The HSQC (600 MHz, $\text{CD}_3\text{OD}$ ) spectrum of compound <b>1</b> .....                 | 6  |
| <b>Figure S4.</b> The HMBC (600 MHz, $\text{CD}_3\text{OD}$ ) spectrum of compound <b>1</b> .....                 | 6  |
| <b>Figure S5.</b> The COSY (600 MHz, $\text{CD}_3\text{OD}$ ) spectrum of compound <b>1</b> .....                 | 7  |
| <b>Figure S6.</b> The HRESIMS spectrum of compound <b>1</b> .....                                                 | 7  |
| <b>Figure S7.</b> The IR spectrum of compound <b>1</b> .....                                                      | 8  |
| <b>Figure S8.</b> The UV spectrum of compound <b>1</b> .....                                                      | 8  |
| <b>Figure S9.</b> The $^1\text{H}$ NMR (600 MHz, $\text{CD}_3\text{OD}$ ) spectrum of compound <b>2</b> .....     | 9  |
| <b>Figure S10.</b> The $^{13}\text{C}$ NMR (150 MHz, $\text{CD}_3\text{OD}$ ) spectrum of compound <b>2</b> ..... | 9  |
| <b>Figure S11.</b> The HSQC (600 MHz, $\text{CD}_3\text{OD}$ ) spectrum of compound <b>2</b> .....                | 10 |
| <b>Figure S12.</b> The HMBC (600 MHz, $\text{CD}_3\text{OD}$ ) spectrum of compound <b>2</b> .....                | 10 |
| <b>Figure S13.</b> The COSY (600 MHz, $\text{CD}_3\text{OD}$ ) spectrum of compound <b>2</b> .....                | 11 |
| <b>Figure S14.</b> The HRESIMS spectrum of compound <b>2</b> .....                                                | 11 |
| <b>Figure S15.</b> The IR spectrum of compound <b>2</b> .....                                                     | 12 |
| <b>Figure S16.</b> The UV spectrum of compound <b>2</b> .....                                                     | 12 |
| <b>Figure S17.</b> The $^1\text{H}$ NMR (600 MHz, $\text{CD}_3\text{OD}$ ) spectrum of compound <b>3</b> .....    | 13 |
| <b>Figure S18.</b> The $^{13}\text{C}$ NMR (150 MHz, $\text{CD}_3\text{OD}$ ) spectrum of compound <b>3</b> ..... | 13 |
| <b>Figure S19.</b> The HSQC (600 MHz, $\text{CD}_3\text{OD}$ ) spectrum of compound <b>3</b> .....                | 14 |
| <b>Figure S20.</b> The HMBC (600 MHz, $\text{CD}_3\text{OD}$ ) spectrum of compound <b>3</b> .....                | 14 |
| <b>Figure S21.</b> The COSY (600 MHz, $\text{CD}_3\text{OD}$ ) spectrum of compound <b>3</b> .....                | 15 |
| <b>Figure S22.</b> The HRESIMS spectrum of compound <b>3</b> .....                                                | 15 |
| <b>Figure S23.</b> The IR spectrum of compound <b>3</b> .....                                                     | 16 |
| <b>Figure S24.</b> The UV spectrum of compound <b>3</b> .....                                                     | 16 |
| <b>Figure S25.</b> The $^1\text{H}$ NMR (600 MHz, $\text{CD}_3\text{OD}$ ) spectrum of compound <b>4</b> .....    | 17 |
| <b>Figure S26.</b> The $^{13}\text{C}$ NMR (150 MHz, $\text{CD}_3\text{OD}$ ) spectrum of compound <b>4</b> ..... | 17 |
| <b>Figure S27.</b> The HSQC (600 MHz, $\text{CD}_3\text{OD}$ ) spectrum of compound <b>4</b> .....                | 18 |
| <b>Figure S28.</b> The HMBC (600 MHz, $\text{CD}_3\text{OD}$ ) spectrum of compound <b>4</b> .....                | 18 |
| <b>Figure S29.</b> The COSY (600 MHz, $\text{CD}_3\text{OD}$ ) spectrum of compound <b>4</b> .....                | 19 |
| <b>Figure S30.</b> The HRESIMS spectrum of compound <b>4</b> .....                                                | 19 |
| <b>Figure S31.</b> The IR spectrum of compound <b>4</b> .....                                                     | 20 |
| <b>Figure S32.</b> The UV spectrum of compound <b>4</b> .....                                                     | 20 |
| <b>Figure S33.</b> The $^1\text{H}$ NMR (600 MHz, $\text{CD}_3\text{OD}$ ) spectrum of compound <b>5</b> .....    | 21 |
| <b>Figure S34.</b> The $^{13}\text{C}$ NMR (150 MHz, $\text{CD}_3\text{OD}$ ) spectrum of compound <b>5</b> ..... | 21 |
| <b>Figure S35.</b> The HSQC (600 MHz, $\text{CD}_3\text{OD}$ ) spectrum of compound <b>5</b> .....                | 22 |
| <b>Figure S36.</b> The HMBC (600 MHz, $\text{CD}_3\text{OD}$ ) spectrum of compound <b>5</b> .....                | 22 |

|                                                                                                              |    |
|--------------------------------------------------------------------------------------------------------------|----|
| <b>Figure S37.</b> The COSY (600 MHz, CD <sub>3</sub> OD) spectrum of compound <b>5</b> .....                | 23 |
| <b>Figure S38.</b> The HRESIMS spectrum of compound <b>5</b> .....                                           | 23 |
| <b>Figure S39.</b> The IR spectrum of compound <b>5</b> .....                                                | 24 |
| <b>Figure S40.</b> The UV spectrum of compound <b>5</b> .....                                                | 24 |
| <b>Figure S41.</b> The <sup>1</sup> H NMR (600 MHz, CD <sub>3</sub> OD) spectrum of compound <b>6</b> .....  | 25 |
| <b>Figure S42.</b> The <sup>13</sup> C NMR (150 MHz, CD <sub>3</sub> OD) spectrum of compound <b>6</b> ..... | 25 |
| <b>Figure S43.</b> The HSQC (600 MHz, CD <sub>3</sub> OD) spectrum of compound <b>6</b> .....                | 26 |
| <b>Figure S44.</b> The HMBC (600 MHz, CD <sub>3</sub> OD) spectrum of compound <b>6</b> .....                | 26 |
| <b>Figure S45.</b> The COSY (600 MHz, CD <sub>3</sub> OD) spectrum of compound <b>6</b> .....                | 27 |
| <b>Figure S46.</b> The NOESY (600 MHz, CD <sub>3</sub> OD) spectrum of compound <b>6</b> .....               | 27 |
| <b>Figure S47.</b> The HRESIMS spectrum of compound <b>6</b> .....                                           | 28 |
| <b>Figure S48.</b> The IR spectrum of compound <b>6</b> .....                                                | 28 |
| <b>Figure S49.</b> The UV spectrum of compound <b>6</b> .....                                                | 29 |
| <b>Figure S50.</b> The <sup>1</sup> H NMR (600 MHz, CD <sub>3</sub> OD) spectrum of compound <b>7</b> .....  | 30 |
| <b>Figure S51.</b> The <sup>13</sup> C NMR (150 MHz, CD <sub>3</sub> OD) spectrum of compound <b>7</b> ..... | 30 |
| <b>Figure S52.</b> The HSQC (600 MHz, CD <sub>3</sub> OD) spectrum of compound <b>7</b> .....                | 31 |
| <b>Figure S53.</b> The HMBC (600 MHz, CD <sub>3</sub> OD) spectrum of compound <b>7</b> .....                | 31 |
| <b>Figure S54.</b> The COSY (600 MHz, CD <sub>3</sub> OD) spectrum of compound <b>7</b> .....                | 32 |
| <b>Figure S55.</b> The NOESY (600 MHz, CD <sub>3</sub> OD) spectrum of compound <b>7</b> .....               | 32 |
| <b>Figure S56.</b> The HRESIMS spectrum of compound <b>7</b> .....                                           | 33 |
| <b>Figure S57.</b> The IR spectrum of compound <b>7</b> .....                                                | 33 |
| <b>Figure S58.</b> The UV spectrum of compound <b>7</b> .....                                                | 34 |
| <b>Figure S59.</b> The <sup>1</sup> H NMR (600 MHz, CD <sub>3</sub> OD) spectrum of compound <b>8</b> .....  | 35 |
| <b>Figure S60.</b> The <sup>13</sup> C NMR (150 MHz, CD <sub>3</sub> OD) spectrum of compound <b>8</b> ..... | 35 |
| <b>Figure S61.</b> The HSQC (600 MHz, CD <sub>3</sub> OD) spectrum of compound <b>8</b> .....                | 36 |
| <b>Figure S62.</b> The HMBC (600 MHz, CD <sub>3</sub> OD) spectrum of compound <b>8</b> .....                | 36 |
| <b>Figure S63.</b> The COSY (600 MHz, CD <sub>3</sub> OD) spectrum of compound <b>8</b> .....                | 37 |
| <b>Figure S64.</b> The NOESY (600 MHz, CD <sub>3</sub> OD) spectrum of compound <b>8</b> .....               | 37 |
| <b>Figure S65.</b> The HRESIMS spectrum of compound <b>8</b> .....                                           | 38 |
| <b>Figure S66.</b> The IR spectrum of compound <b>8</b> .....                                                | 38 |
| <b>Figure S67.</b> The UV spectrum of compound <b>8</b> .....                                                | 39 |
| <b>Figure S68.</b> The <sup>1</sup> H NMR (600 MHz, CD <sub>3</sub> OD) spectrum of compound <b>9</b> .....  | 40 |
| <b>Figure S69.</b> The <sup>13</sup> C NMR (150 MHz, CD <sub>3</sub> OD) spectrum of compound <b>9</b> ..... | 40 |
| <b>Figure S70.</b> The HSQC (600 MHz, CD <sub>3</sub> OD) spectrum of compound <b>9</b> .....                | 41 |
| <b>Figure S71.</b> The HMBC (600 MHz, CD <sub>3</sub> OD) spectrum of compound <b>9</b> .....                | 41 |
| <b>Figure S72.</b> The COSY (600 MHz, CD <sub>3</sub> OD) spectrum of compound <b>9</b> .....                | 42 |
| <b>Figure S73.</b> The HRESIMS spectrum of compound <b>9</b> .....                                           | 42 |
| <b>Figure S74.</b> The IR spectrum of compound <b>9</b> .....                                                | 43 |

|                                                                                                                                                                     |    |
|---------------------------------------------------------------------------------------------------------------------------------------------------------------------|----|
| <b>Figure S75.</b> The UV spectrum of compound <b>9</b> .....                                                                                                       | 43 |
| <b>Figure S76.</b> The <sup>1</sup> H NMR (400 MHz, C <sub>5</sub> D <sub>5</sub> N) spectrum of compound <b>7R</b> , <b>10R</b> -MTPA ester of <b>2 (2S)</b> ..... | 44 |
| <b>Figure S77.</b> The <sup>1</sup> H NMR (400 MHz, C <sub>5</sub> D <sub>5</sub> N) spectrum of compound <b>7R</b> , <b>10R</b> -MTPA ester of <b>2 (2R)</b> ..... | 44 |
| <b>Figure S78.</b> The <sup>1</sup> H NMR (400 MHz, C <sub>5</sub> D <sub>5</sub> N) spectrum of compound <b>7S</b> , <b>10R</b> -MTPA ester of <b>3 (3S)</b> ..... | 45 |
| <b>Figure S79.</b> The <sup>1</sup> H NMR (400 MHz, C <sub>5</sub> D <sub>5</sub> N) spectrum of compound <b>7S</b> , <b>10R</b> -MTPA ester of <b>3 (3R)</b> ..... | 45 |
| <b>Figure S80.</b> Structures of previously reported compounds isolated in this study.....                                                                          | 46 |
| <b>Figure S81.</b> Cytotoxicity of all the test compounds against BV-2 cells at a concentration of 20 μM. ....                                                      | 46 |
| <b>Figure S82.</b> ChemBio 3D Ultra 12.0 molecular modelling of <b>7</b> .....                                                                                      | 47 |
| <b>Table S1.</b> Crystal data and experimental details for <b>6</b> .....                                                                                           | 48 |
| <b>Table S2.</b> Bond lengths [Å] and angles [°] for <b>6</b> .....                                                                                                 | 49 |
| <b>Table S3.</b> Crystal data and experimental details for <b>7</b> .....                                                                                           | 53 |
| <b>Table S4.</b> Bond lengths [Å] and angles [°] for <b>7</b> .....                                                                                                 | 54 |

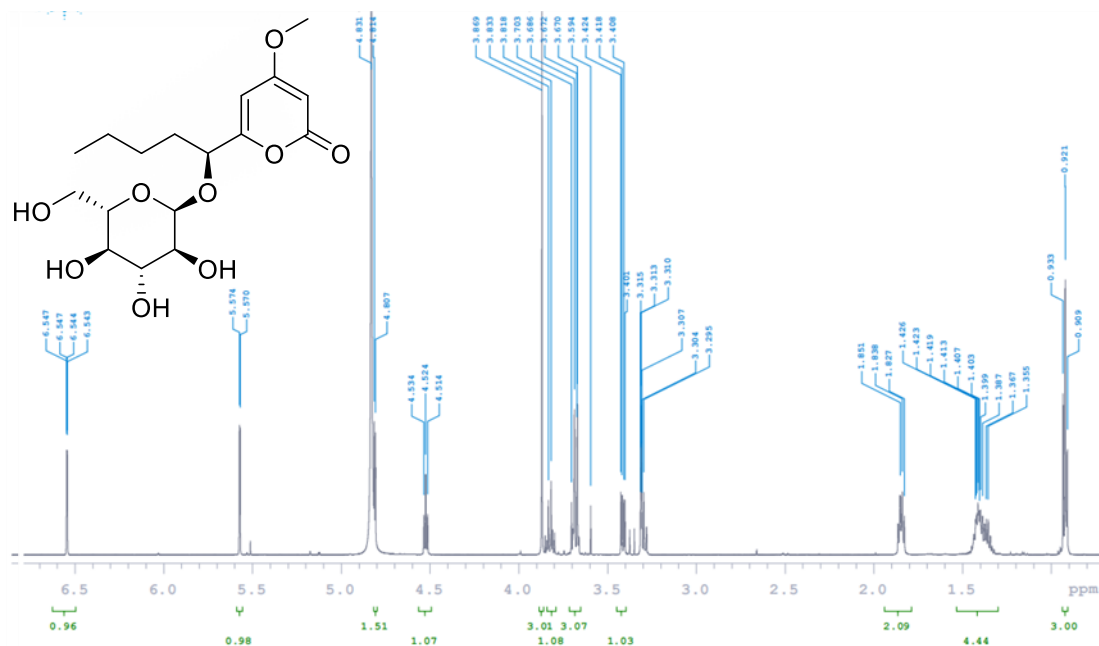

Figure S1. The  $^1\text{H}$  NMR (600 MHz,  $\text{CD}_3\text{OD}$ ) spectrum of compound 1

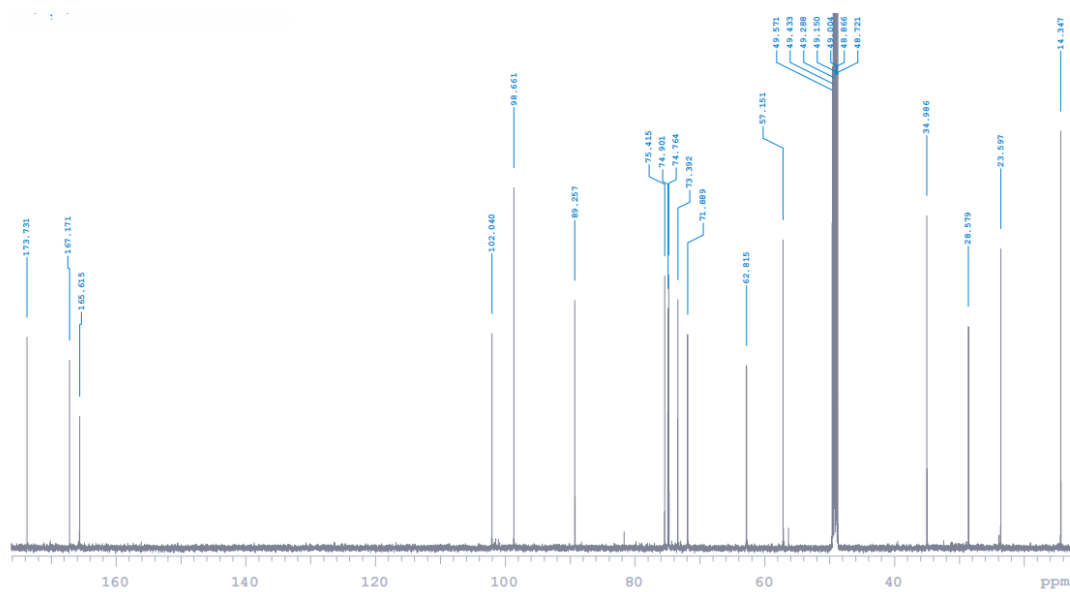

Figure S2. The  $^{13}\text{C}$  NMR (150 MHz,  $\text{CD}_3\text{OD}$ ) spectrum of compound 1

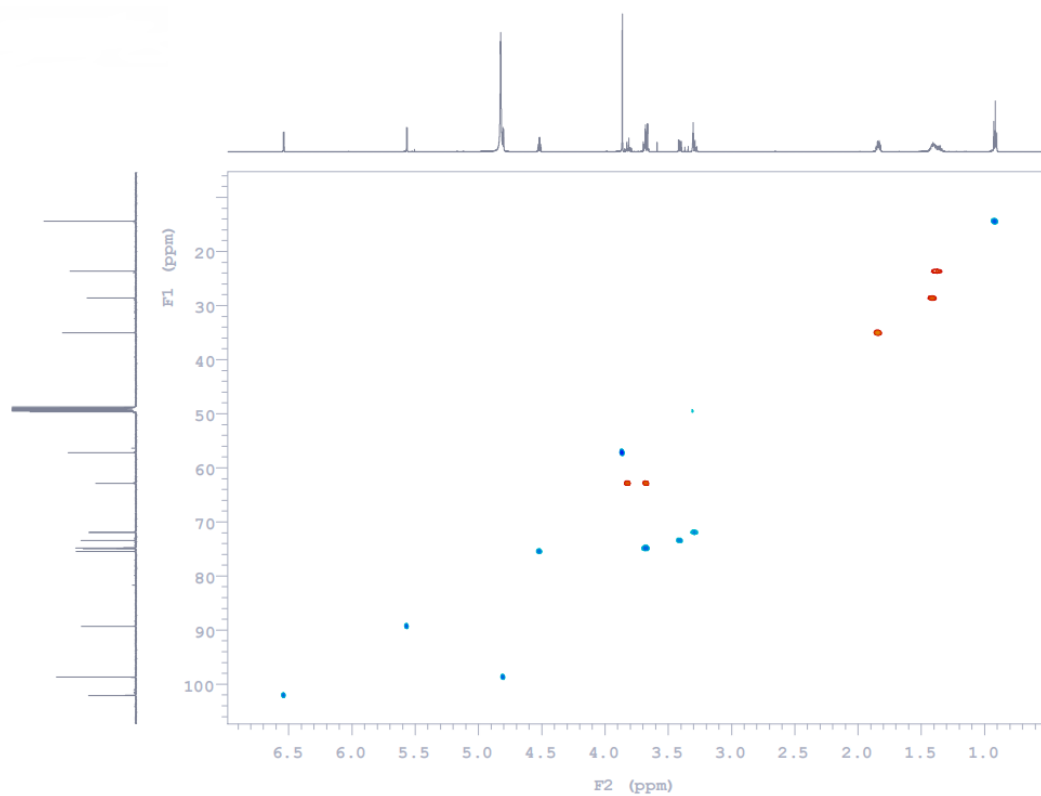

Figure S3. The HSQC (600 MHz, CD<sub>3</sub>OD) spectrum of compound **1**

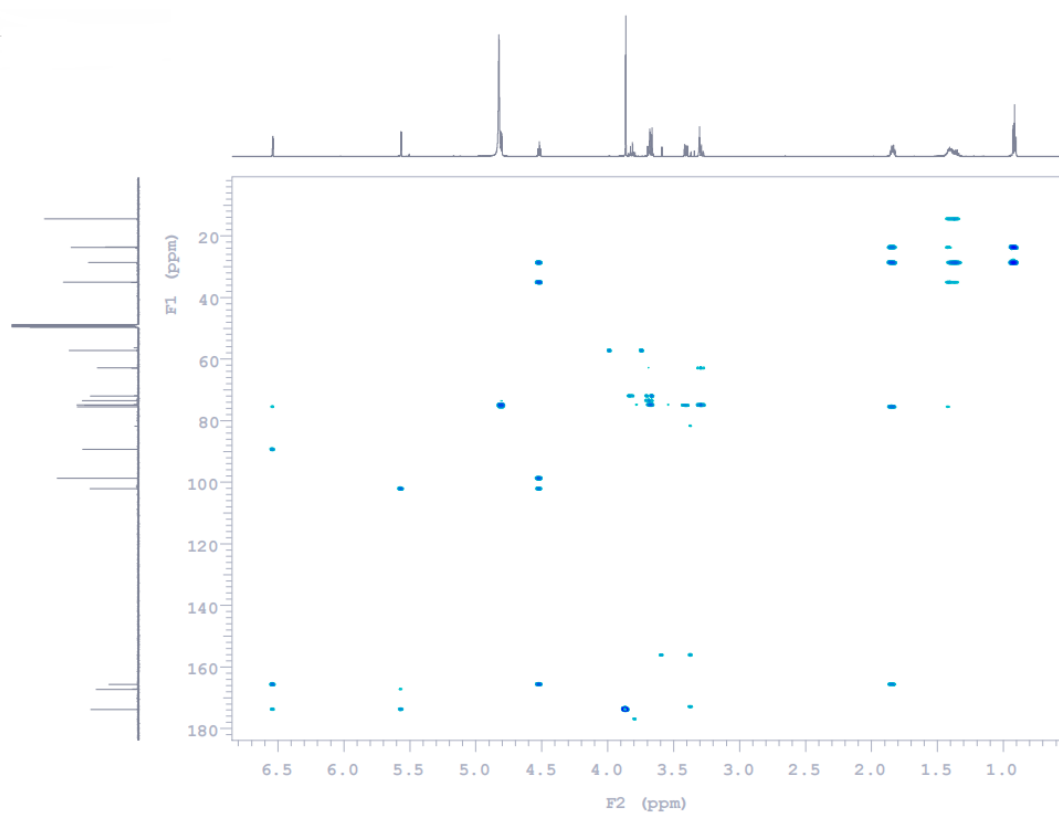

Figure S4. The HMBC (600 MHz, CD<sub>3</sub>OD) spectrum of compound **1**

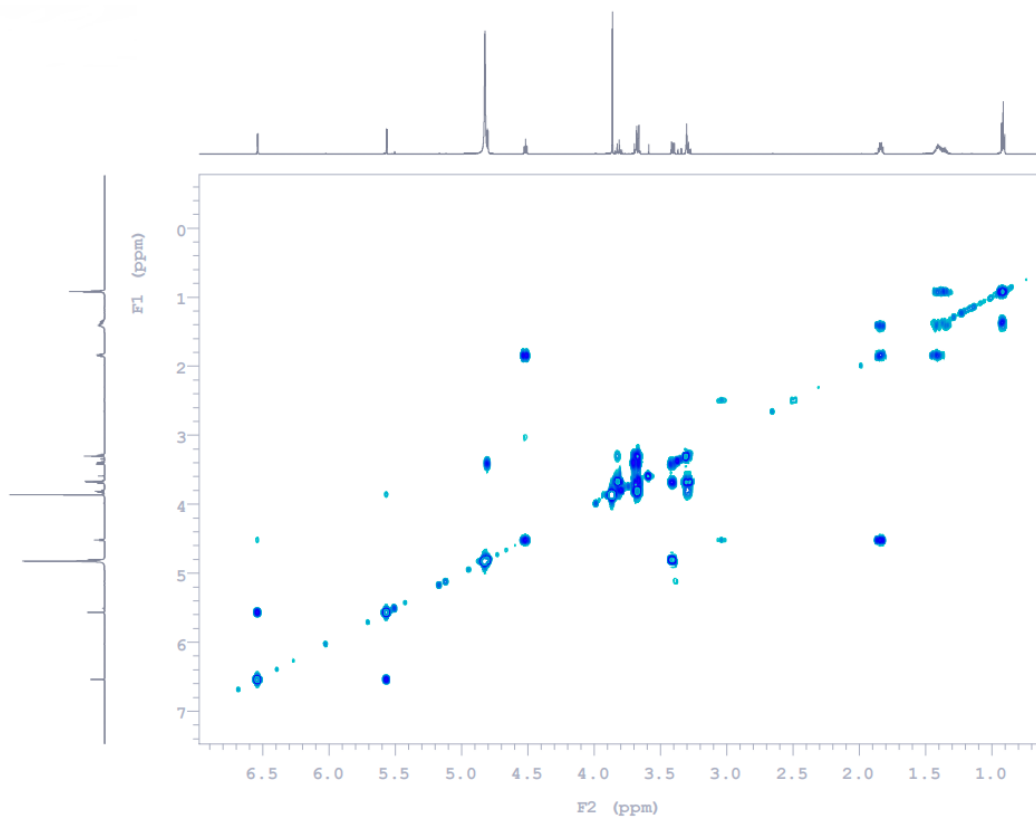

Figure S5. The COSY (600 MHz, CD<sub>3</sub>OD) spectrum of compound **1**

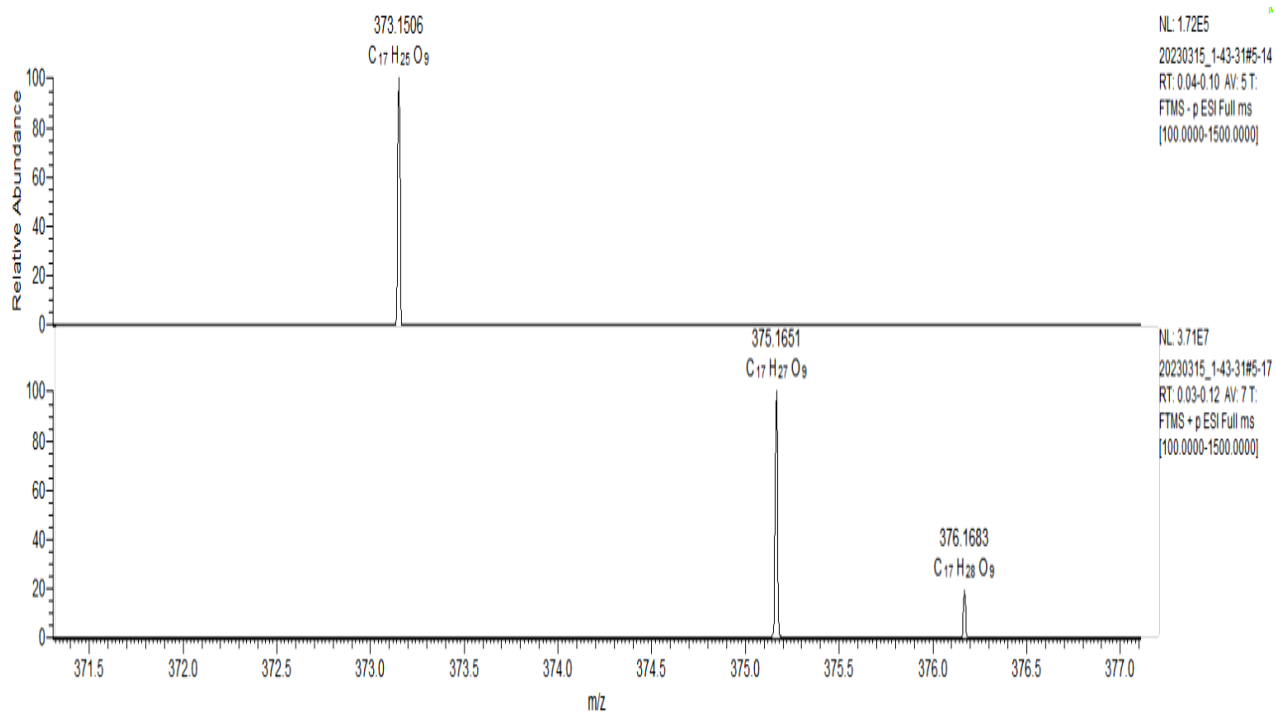

Figure S6. The HRESIMS spectrum of compound **1**

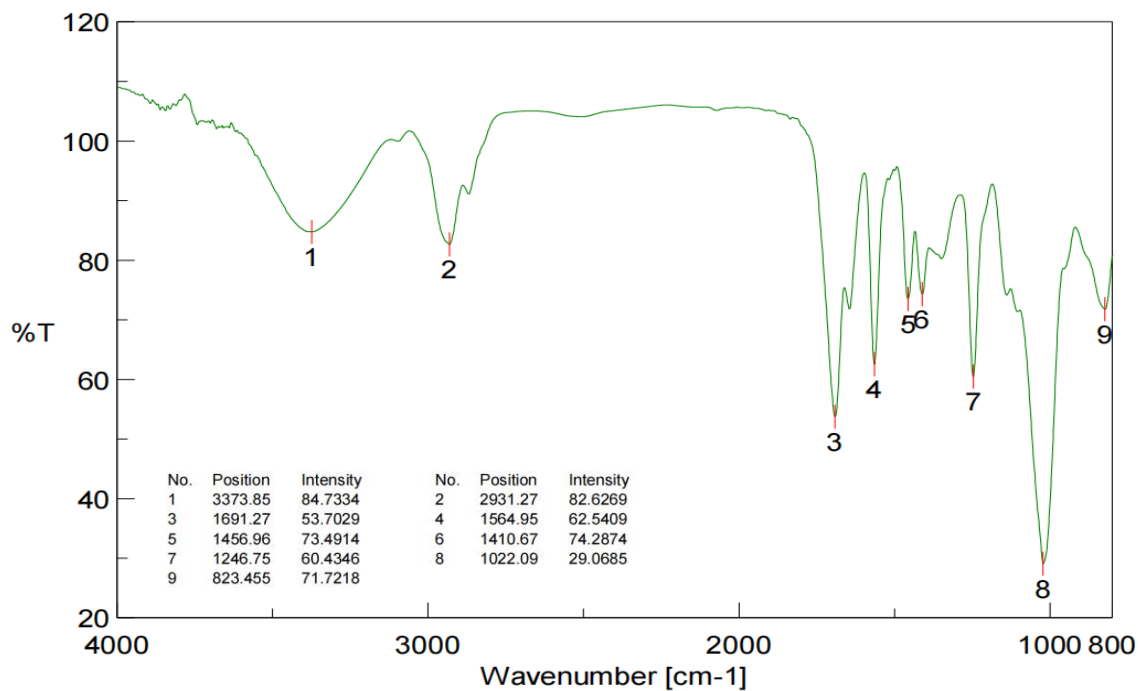

Figure S7. The IR spectrum of compound 1

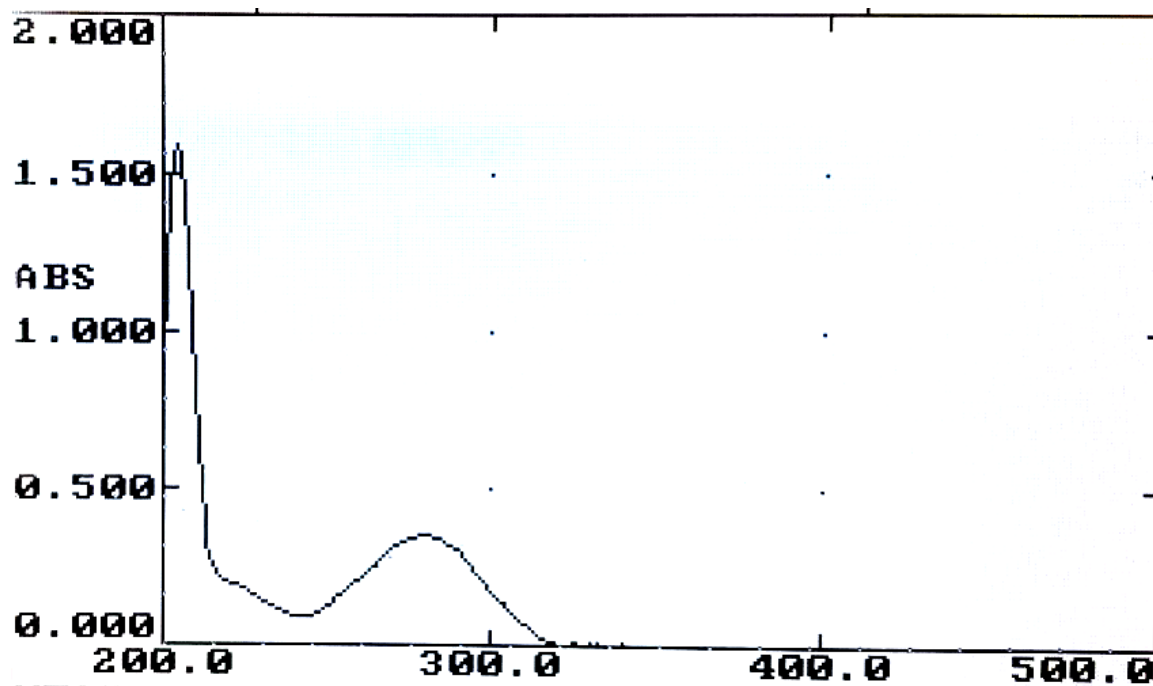

Figure S8. The UV spectrum of compound 1



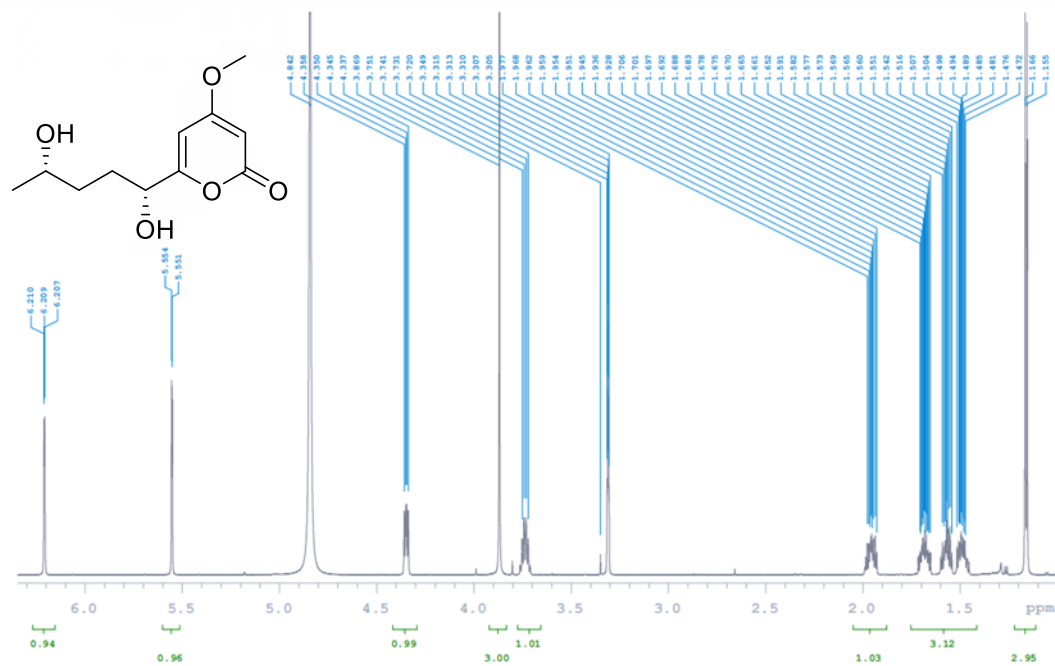

Figure S9. The  $^1\text{H}$  NMR (600 MHz,  $\text{CD}_3\text{OD}$ ) spectrum of compound 2

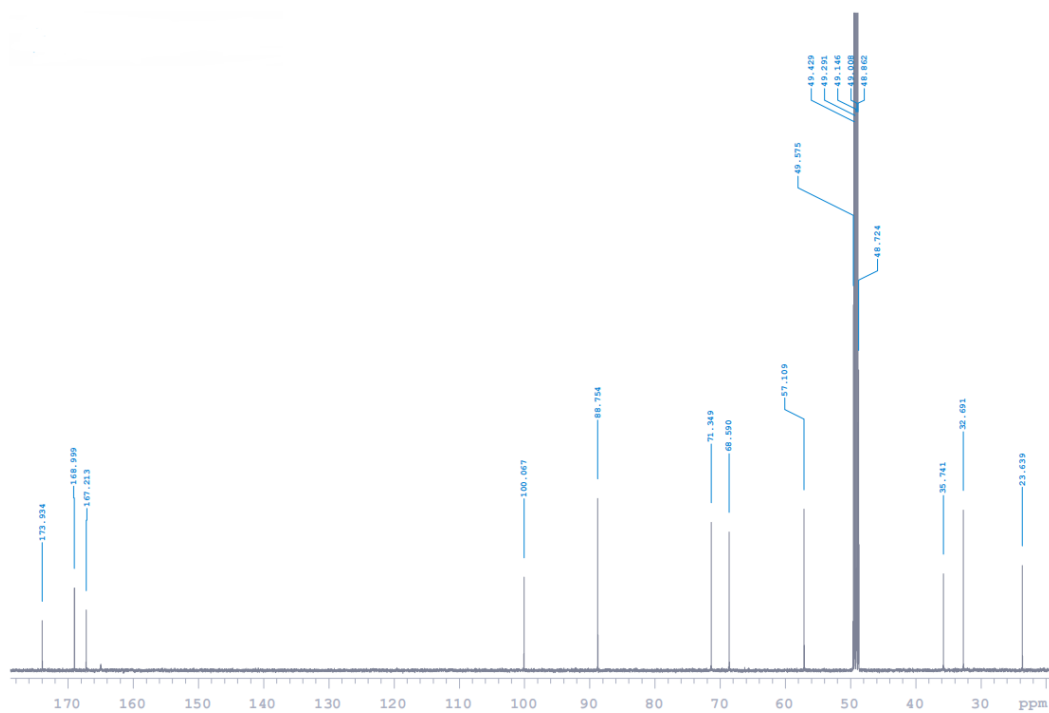

Figure S10. The  $^{13}\text{C}$  NMR (150 MHz,  $\text{CD}_3\text{OD}$ ) spectrum of compound 2

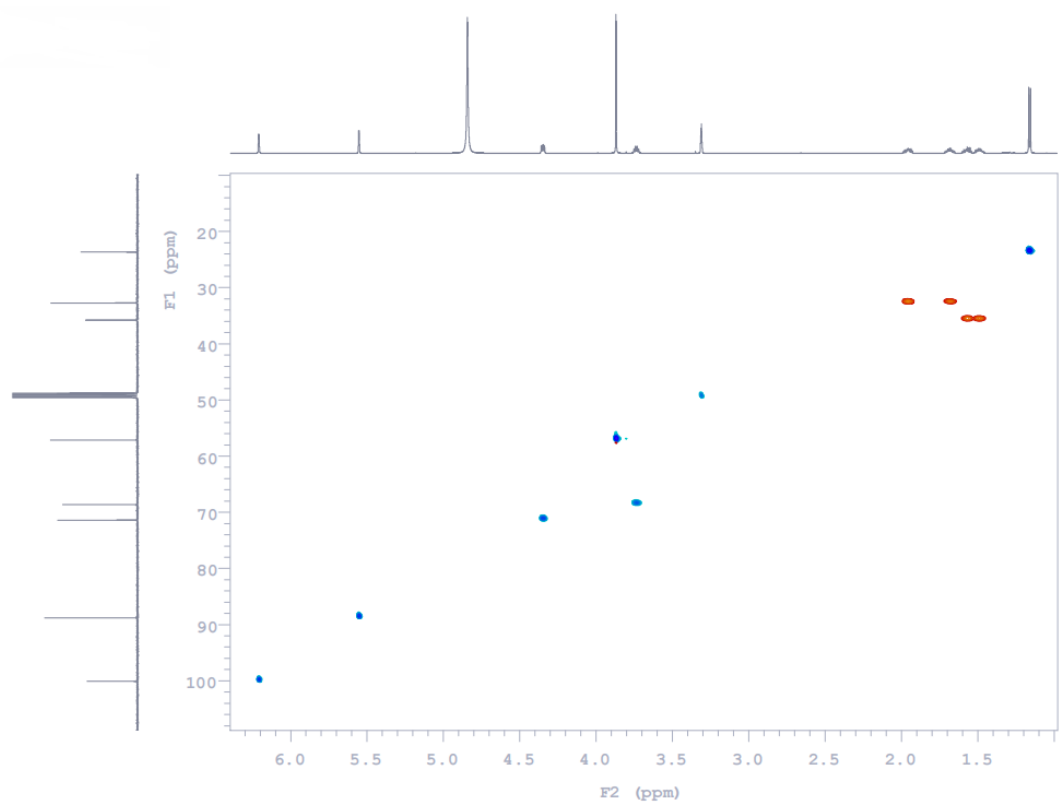

**Figure S11.** The HSQC (600 MHz, CD<sub>3</sub>OD) spectrum of compound **2**

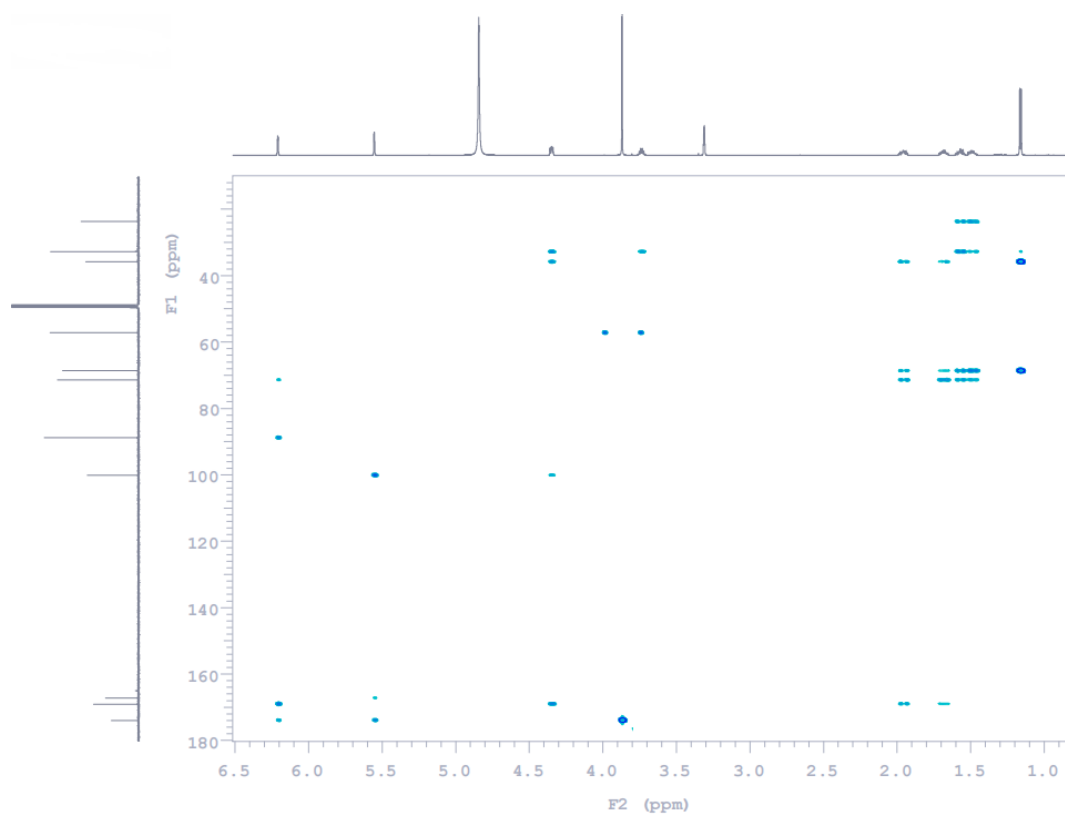

**Figure S12.** The HMBC (600 MHz, CD<sub>3</sub>OD) spectrum of compound **2**

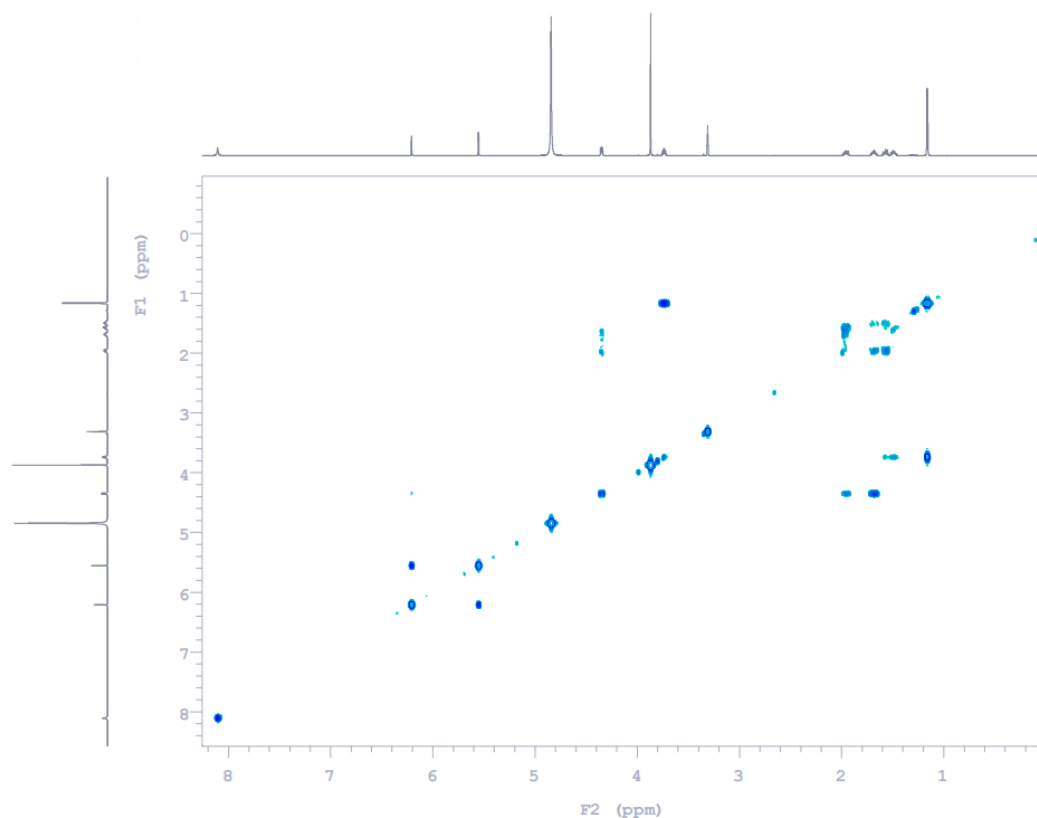

**Figure S13.** The COSY (600 MHz, CD<sub>3</sub>OD) spectrum of compound **2**

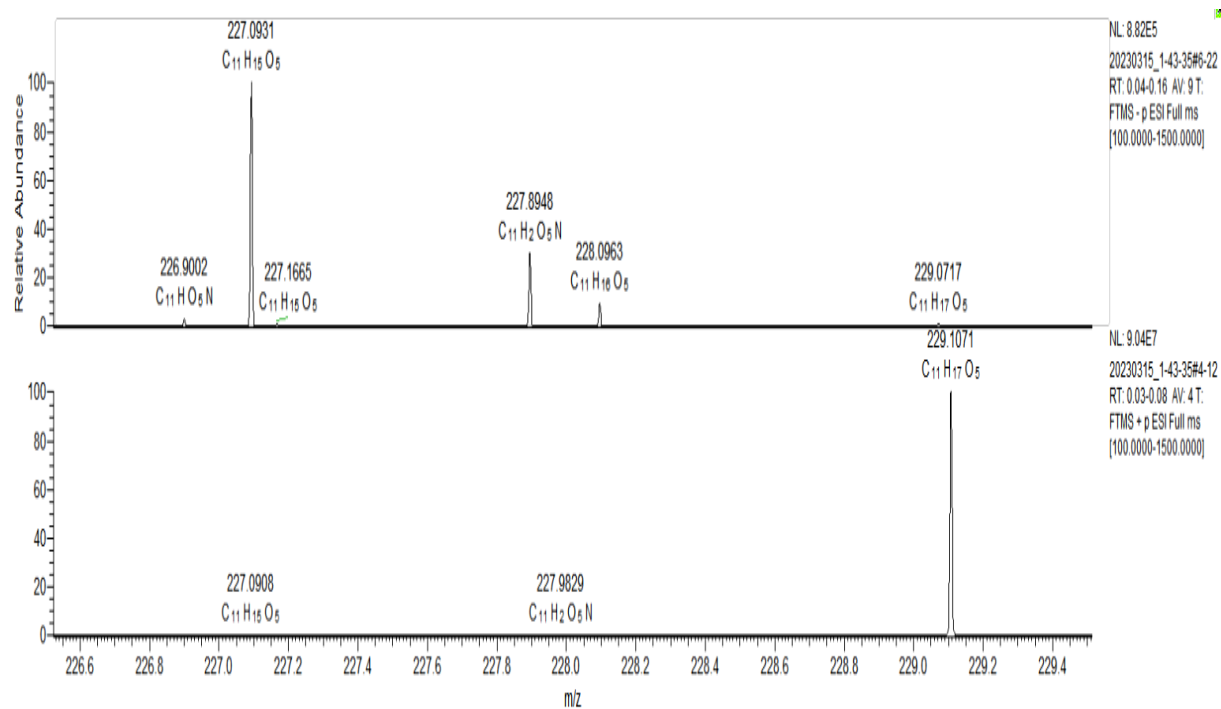

**Figure S14.** The HRESIMS spectrum of compound **2**

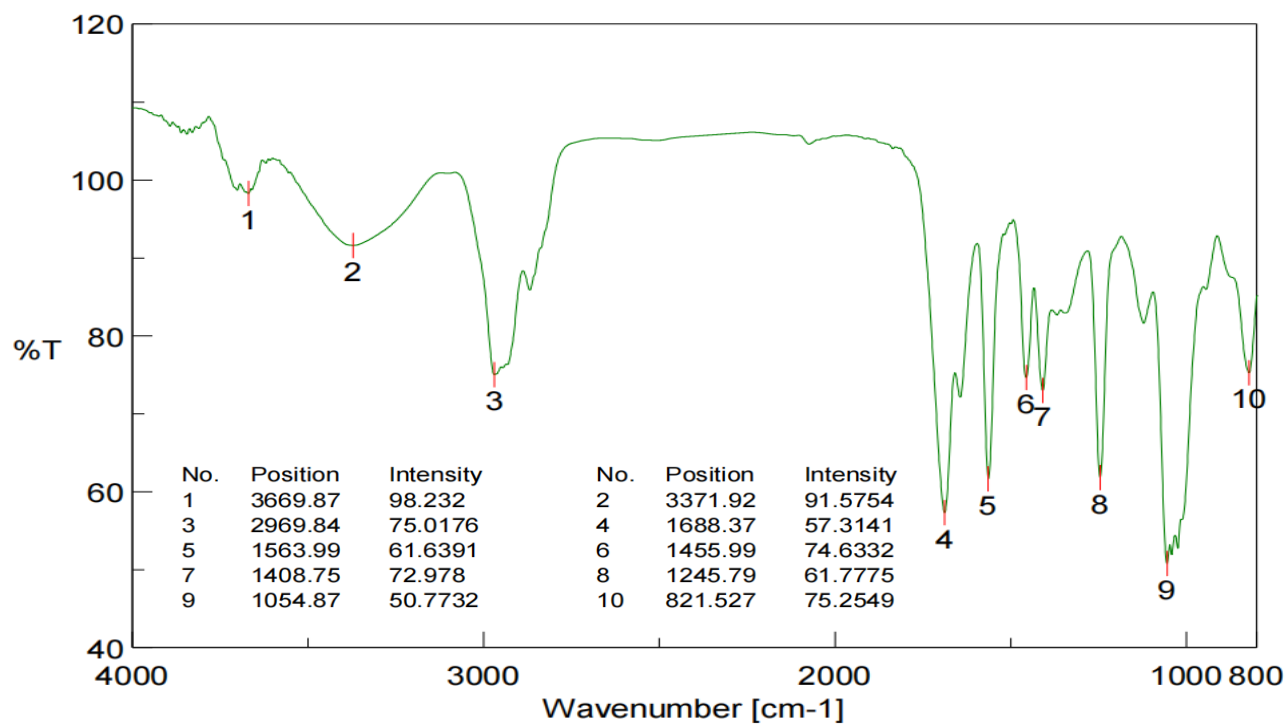

Figure S15. The IR spectrum of compound 2

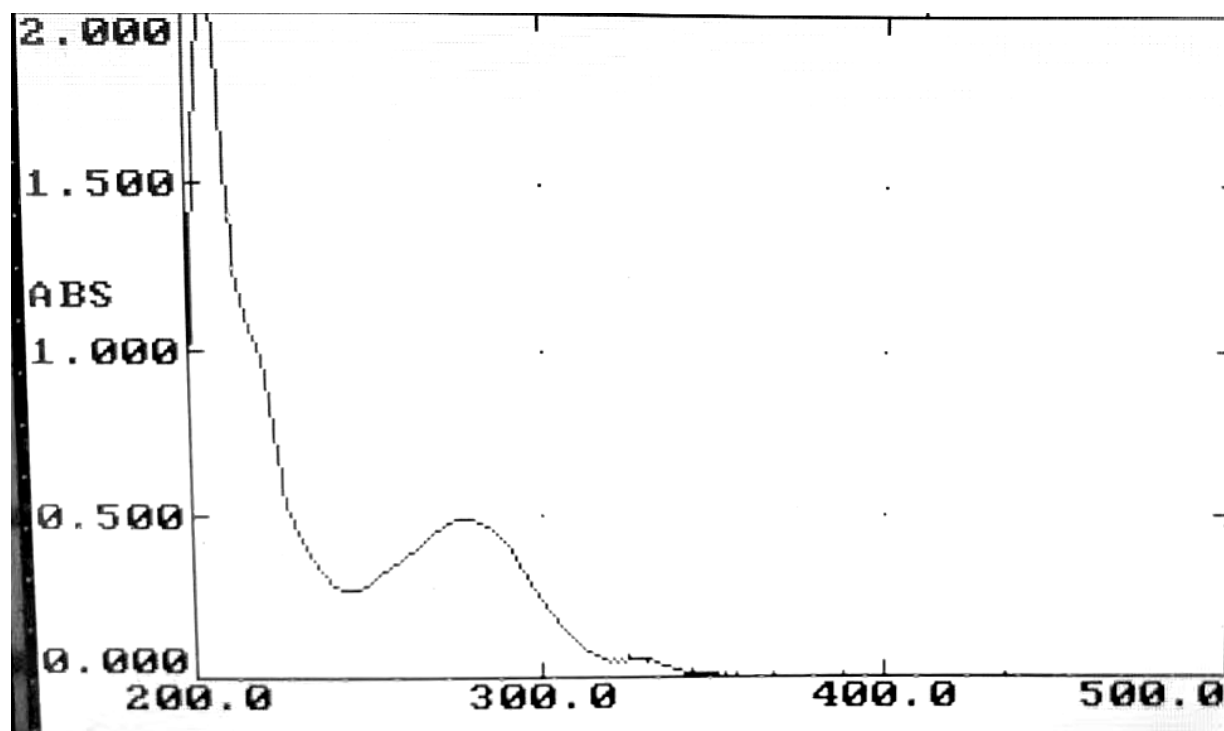

Figure S16. The UV spectrum of compound 2

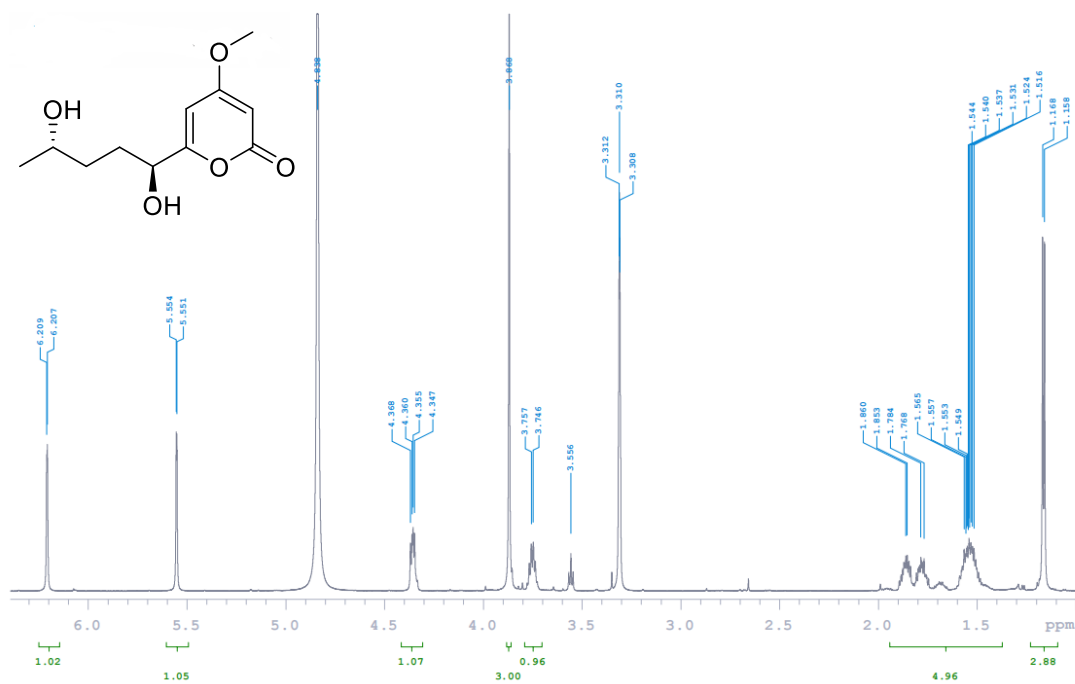

**Figure S17.** The <sup>1</sup>H NMR (600 MHz, CD<sub>3</sub>OD) spectrum of compound **3**

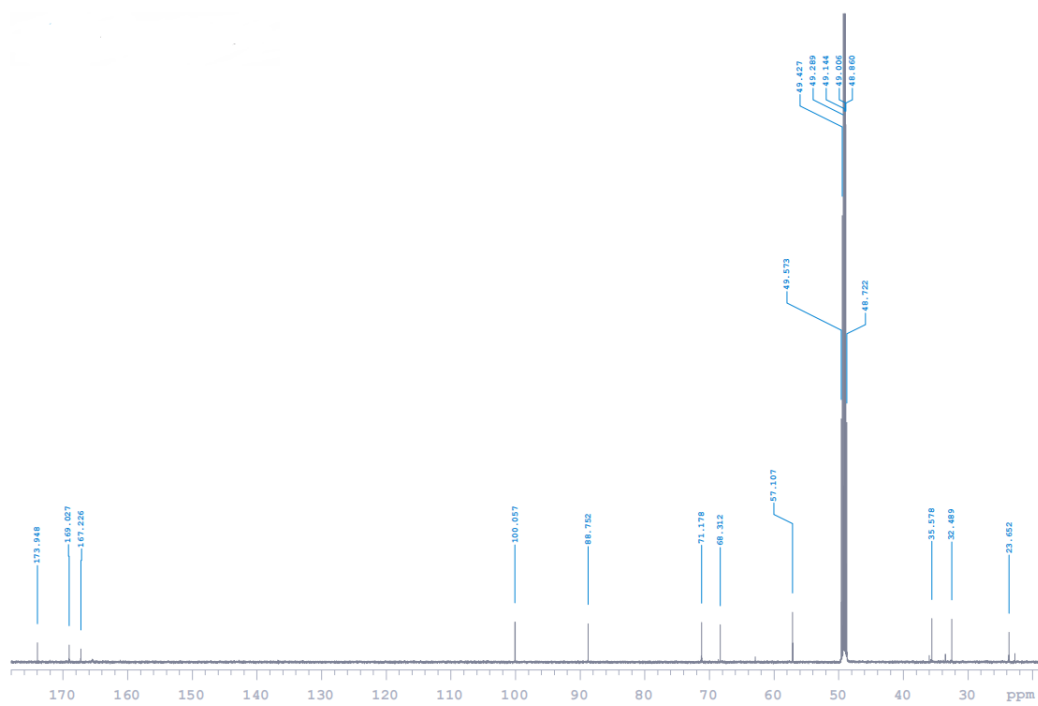

**Figure S18.** The <sup>13</sup>C NMR (150 MHz, CD<sub>3</sub>OD) spectrum of compound **3**

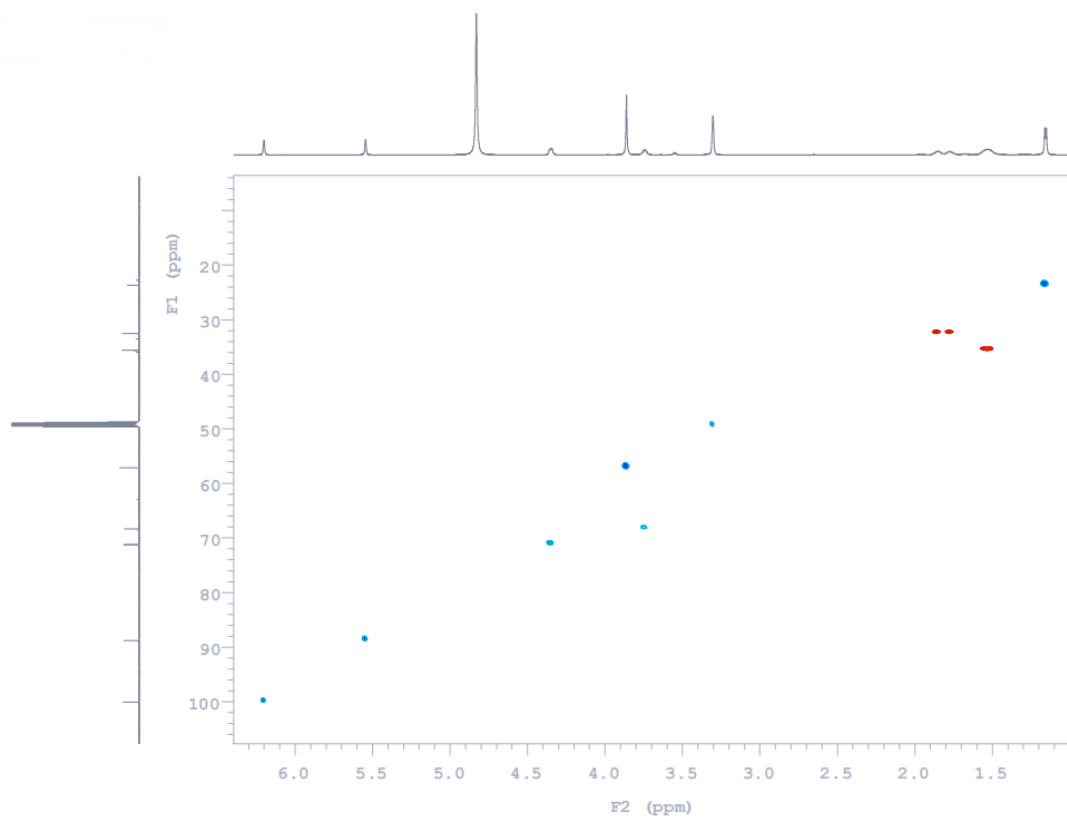

**Figure S19.** The HSQC (600 MHz, CD<sub>3</sub>OD) spectrum of compound **3**

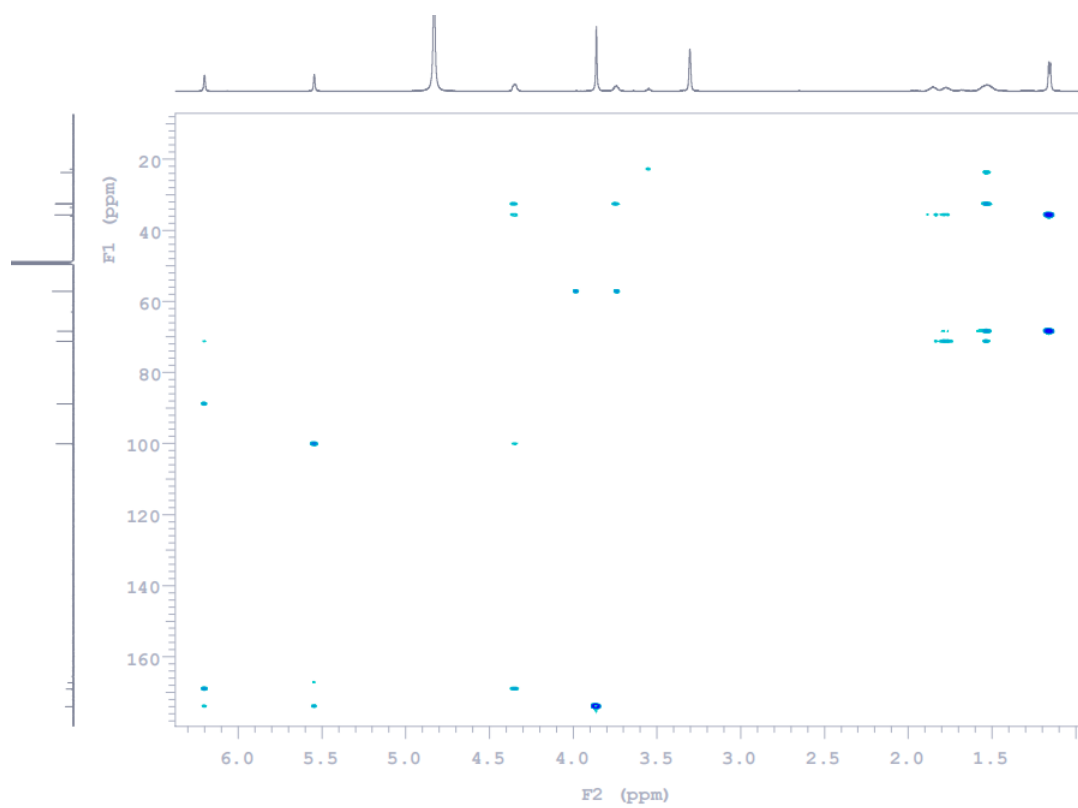

**Figure S20.** The HMBC (600 MHz, CD<sub>3</sub>OD) spectrum of compound **3**

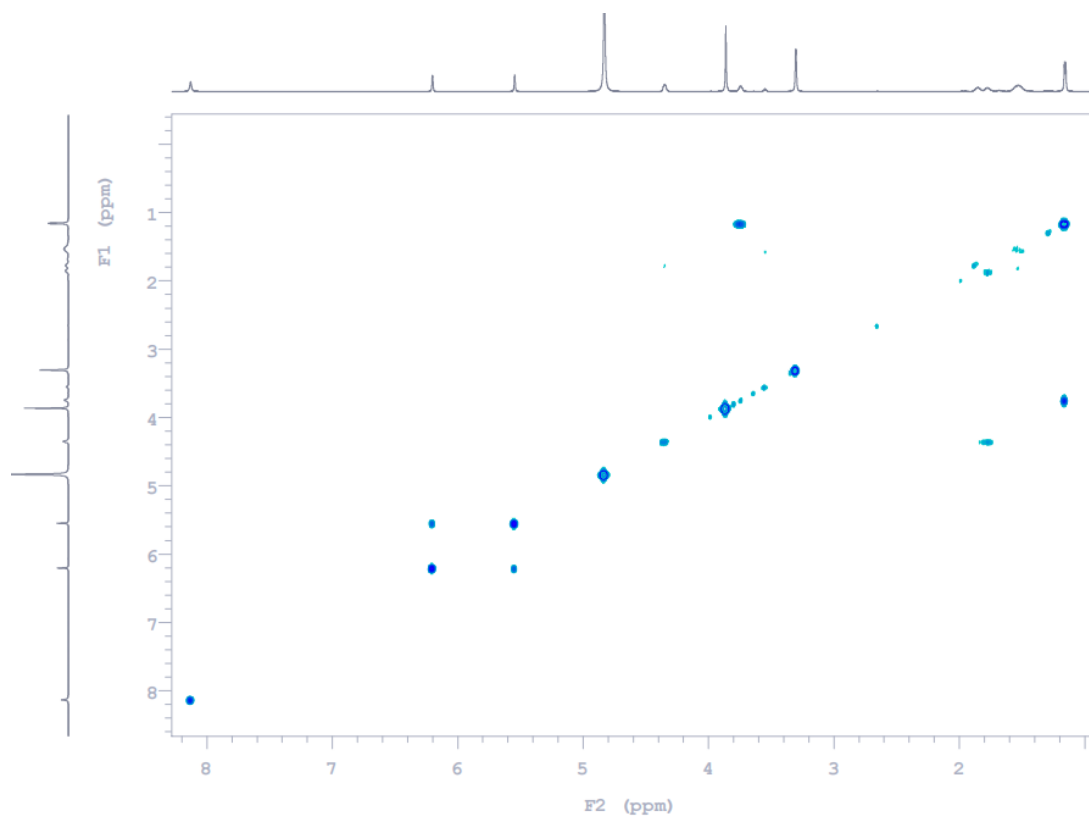

**Figure S21.** The COSY (600 MHz, CD<sub>3</sub>OD) spectrum of compound **3**

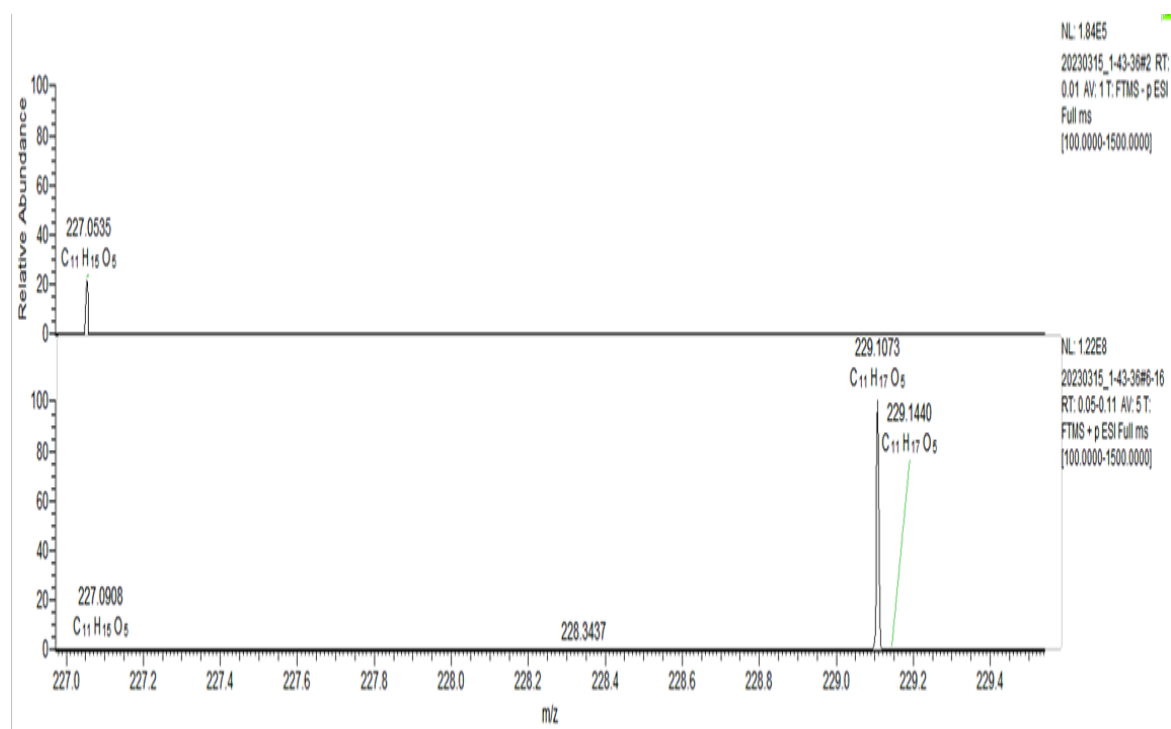

**Figure S22.** The HRESIMS spectrum of compound **3**

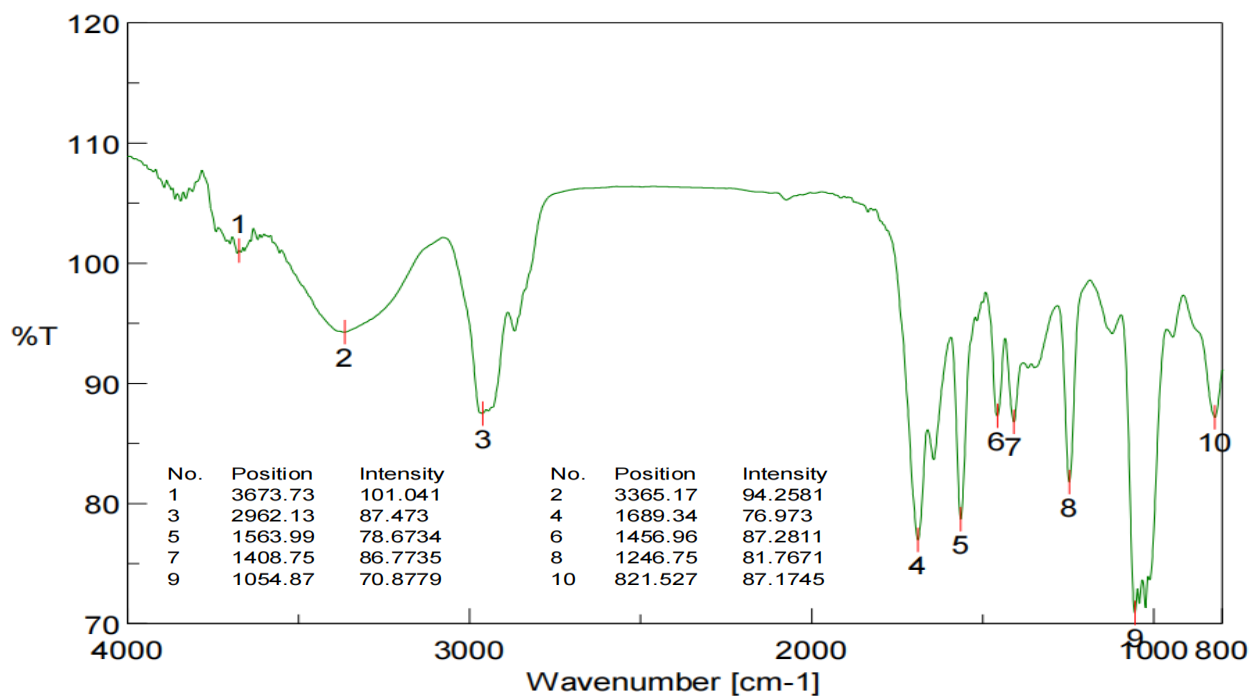

Figure S23. The UV spectrum of compound 3

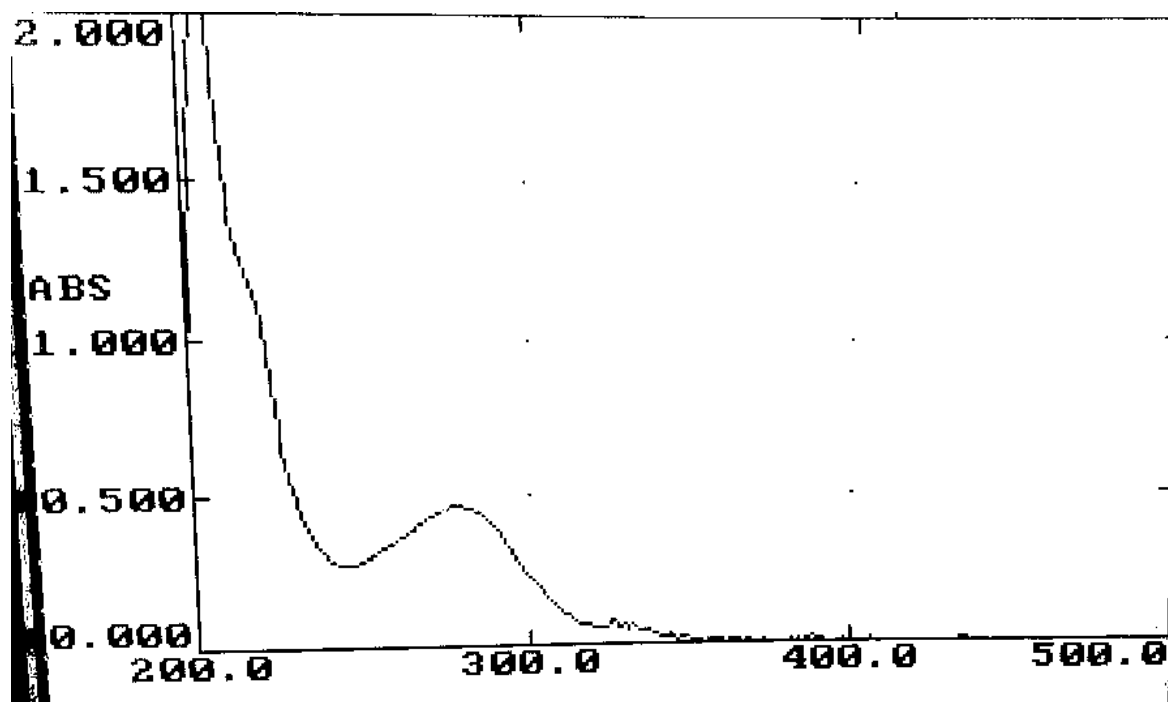

Figure S24. The UV spectrum of compound 3



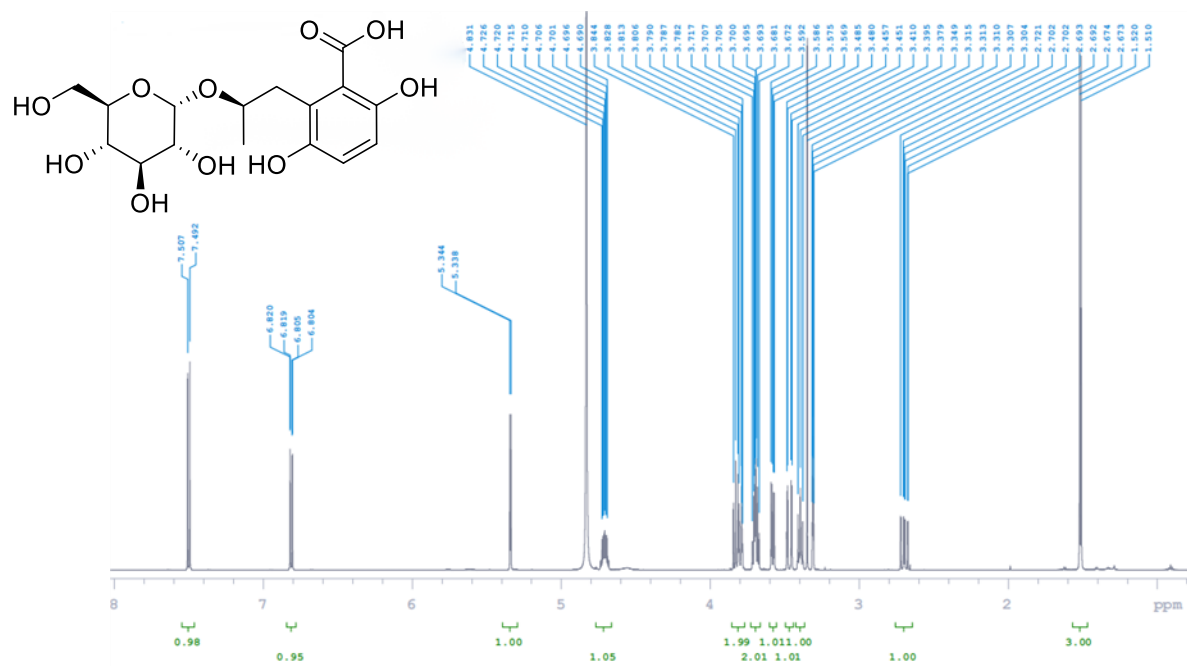

Figure S25. The <sup>1</sup>H NMR (600 MHz, CD<sub>3</sub>OD) spectrum of compound 4

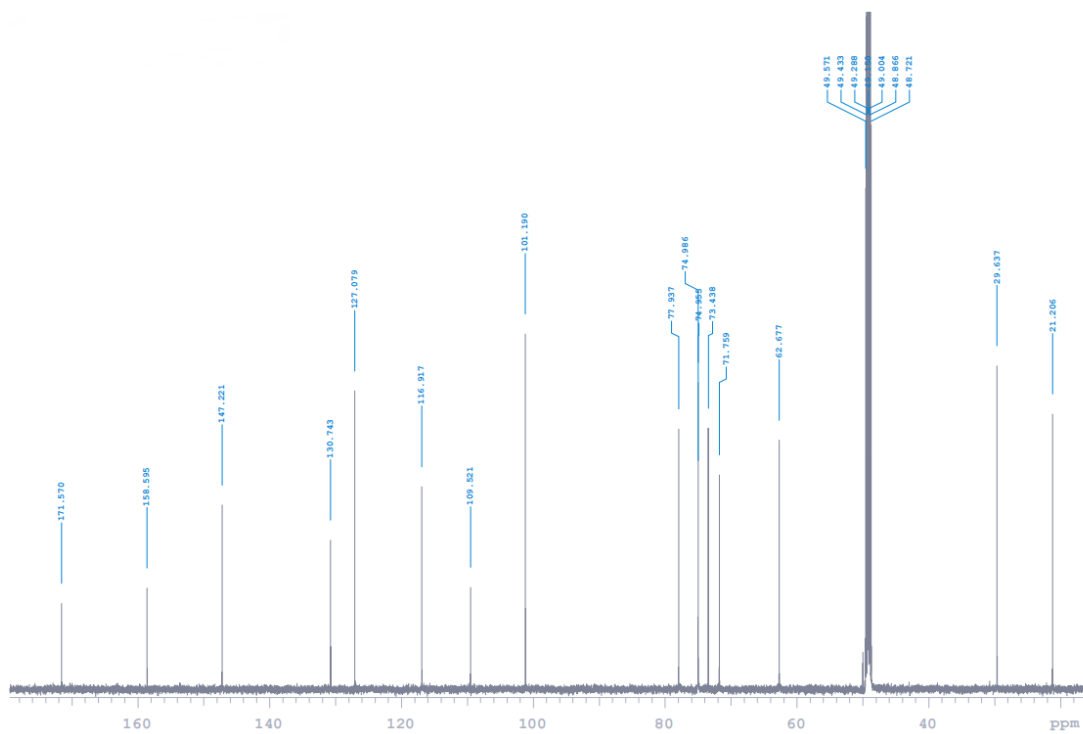

Figure S26. The <sup>13</sup>C NMR (150 MHz, CD<sub>3</sub>OD) spectrum of compound 4

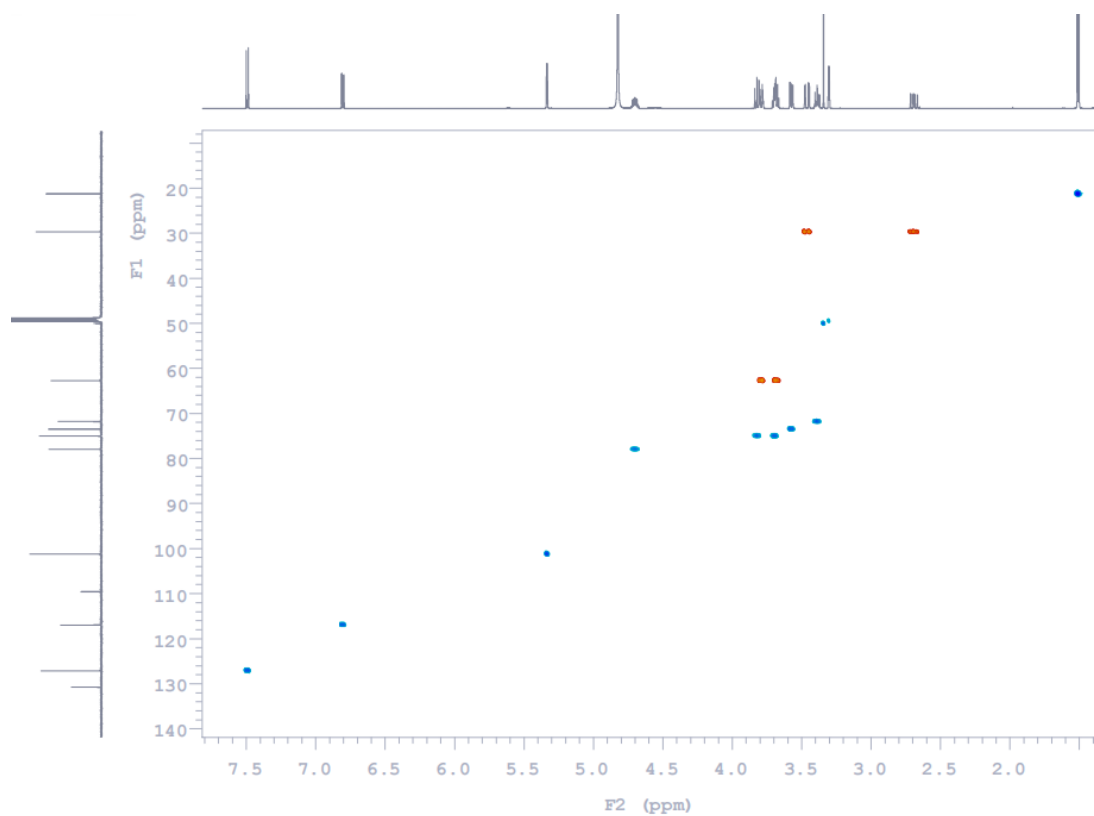

**Figure S27.** The HSQC (600 MHz, CD<sub>3</sub>OD) spectrum of compound **4**

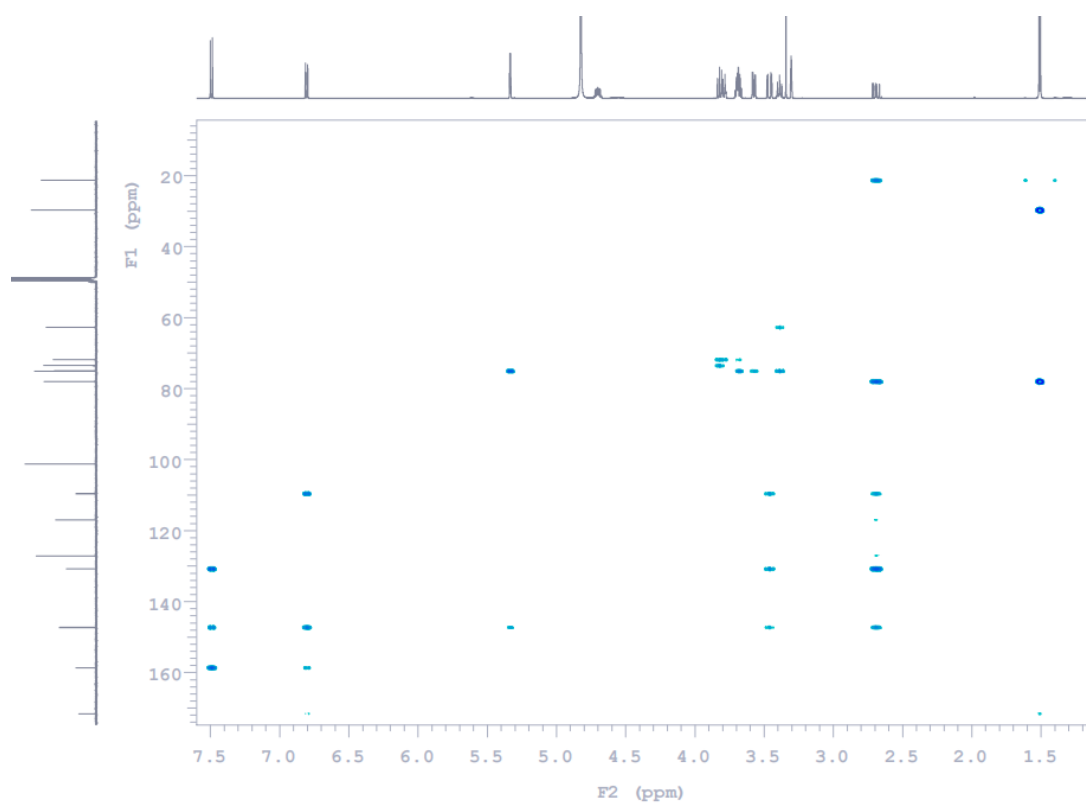

**Figure S28.** The HMBC (600 MHz, CD<sub>3</sub>OD) spectrum of compound **4**

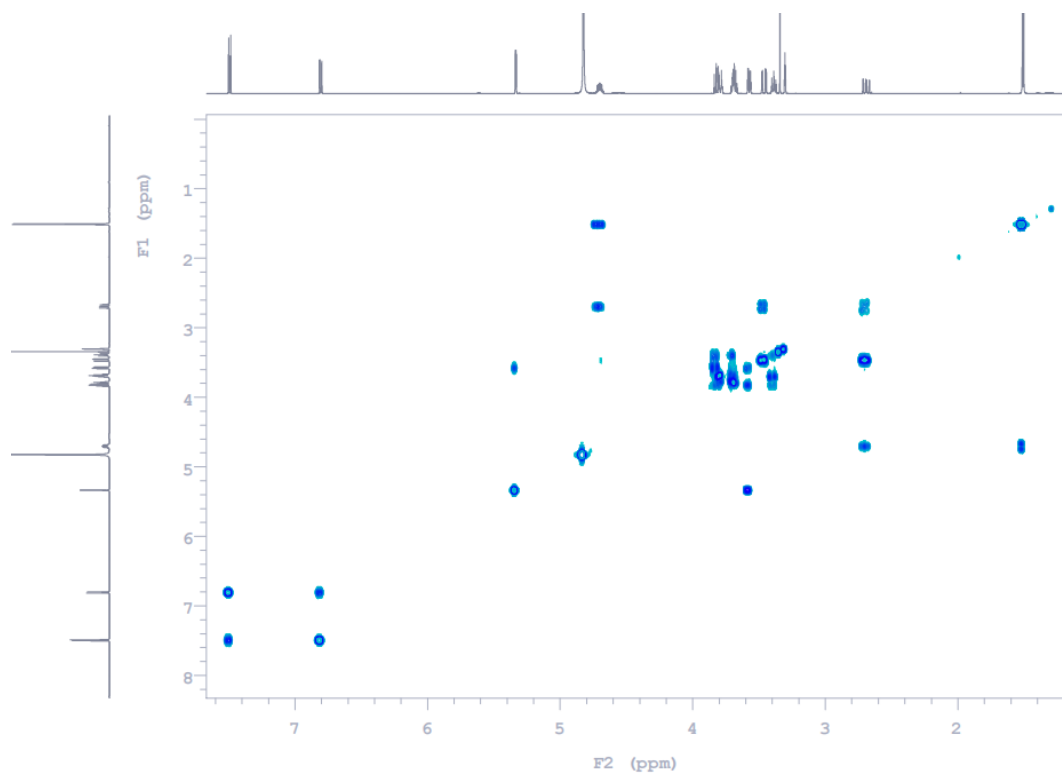

**Figure S29.** The COSY (600 MHz, CD<sub>3</sub>OD) spectrum of compound **4**

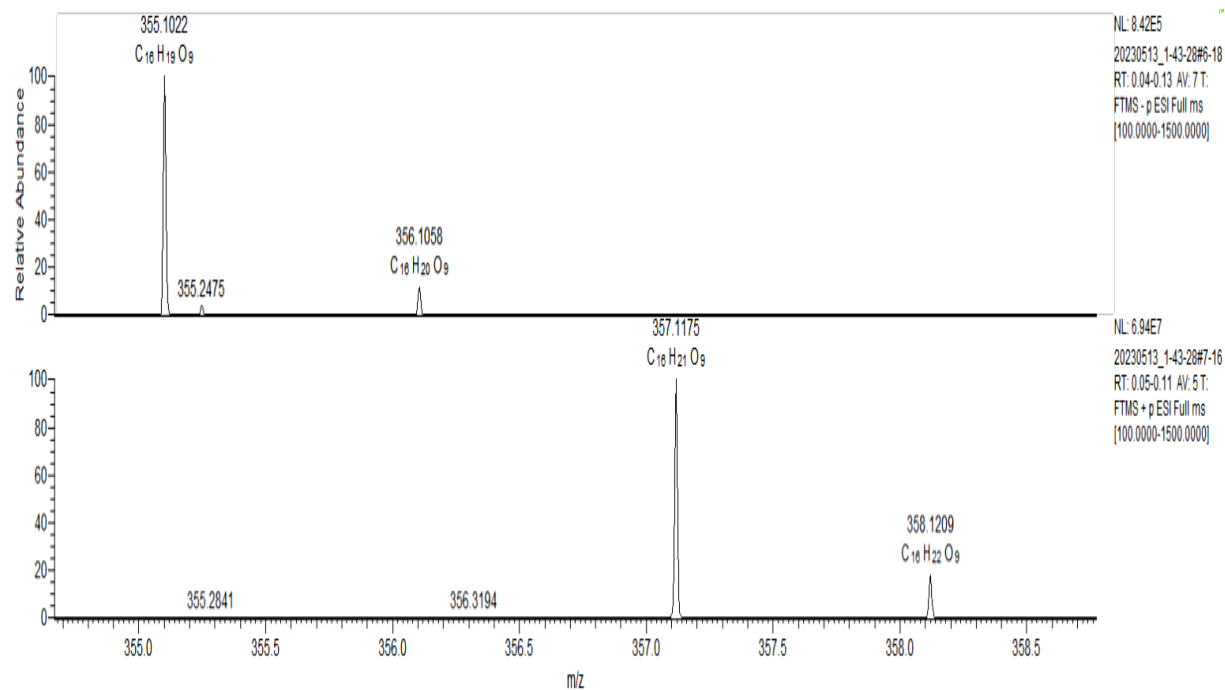

**Figure S30.** The HRESIMS spectrum of compound **4**

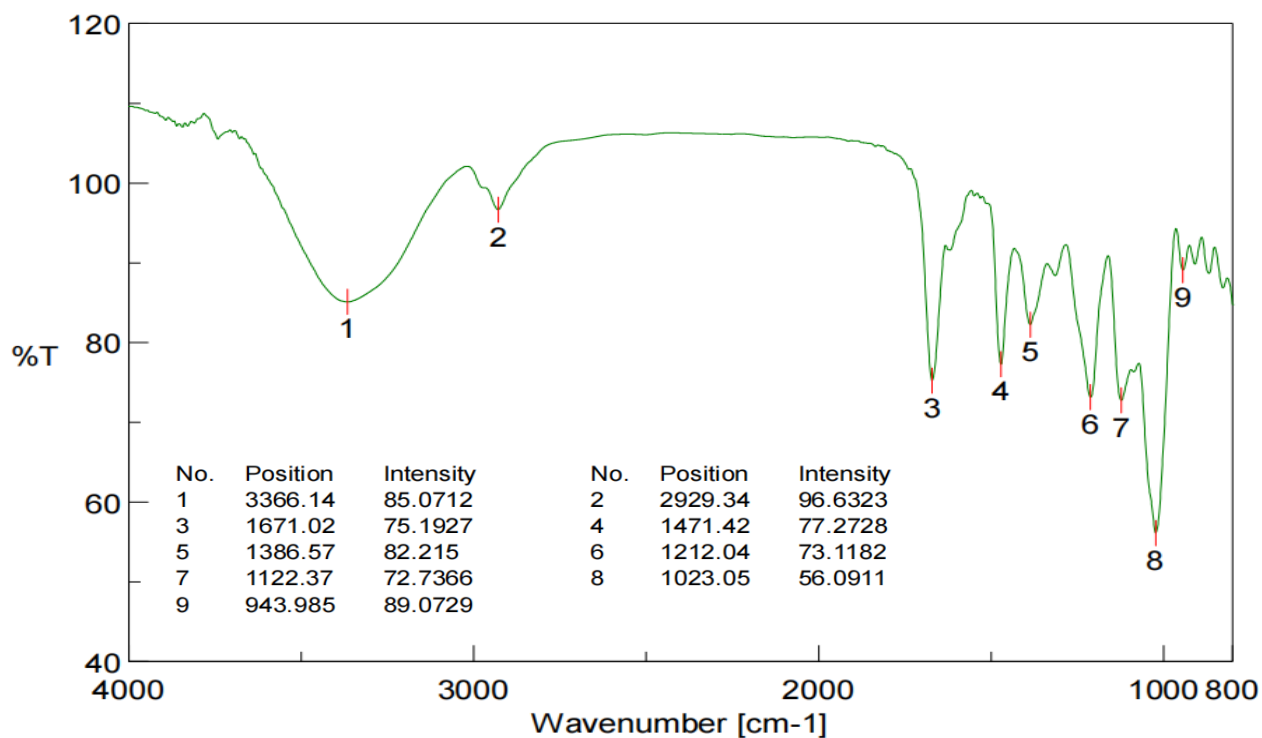

Figure S31. The IR spectrum of compound 4

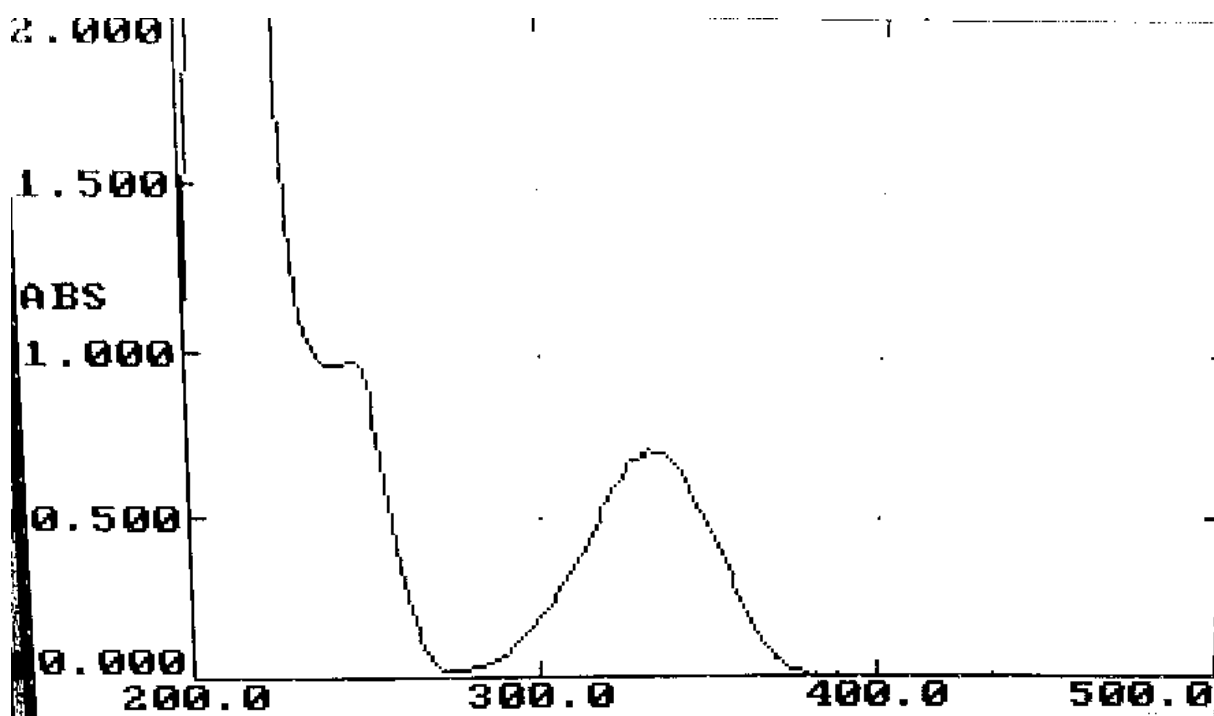

Figure S32. The UV spectrum of compound 4



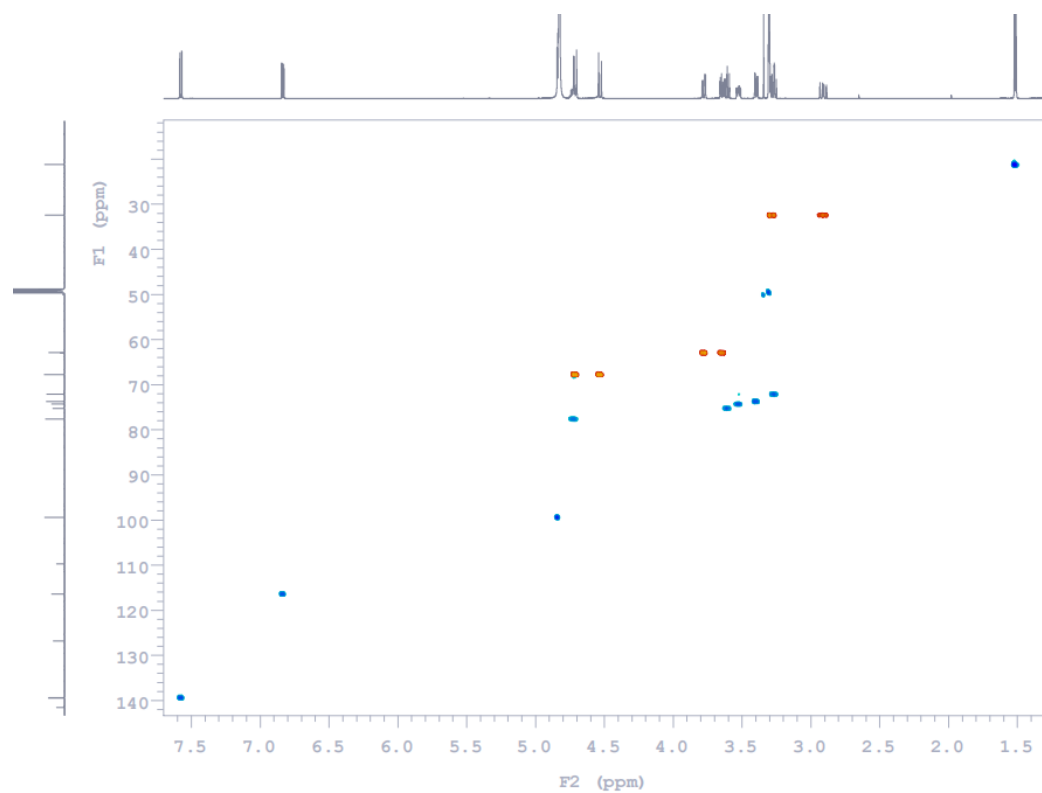

**Figure S35.** The HSQC (600 MHz, CD<sub>3</sub>OD) spectrum of compound **5**

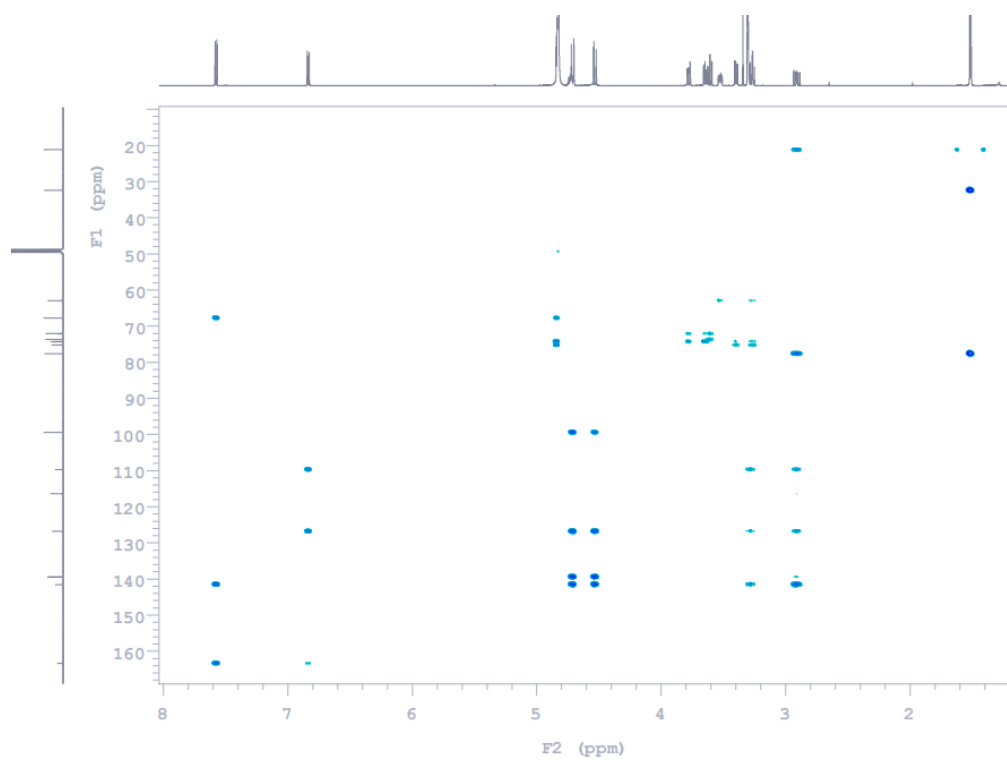

**Figure S36.** The HMBC (600 MHz, CD<sub>3</sub>OD) spectrum of compound **5**

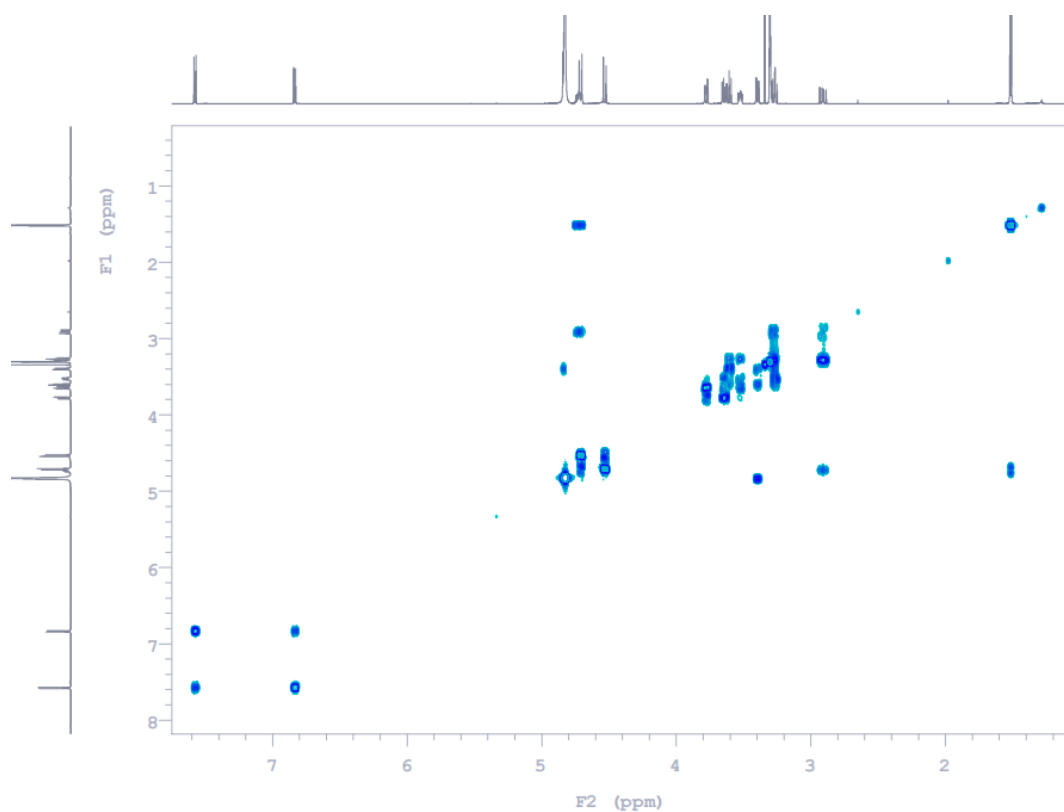

**Figure S37.** The COSY (600 MHz, CD<sub>3</sub>OD) spectrum of compound **5**

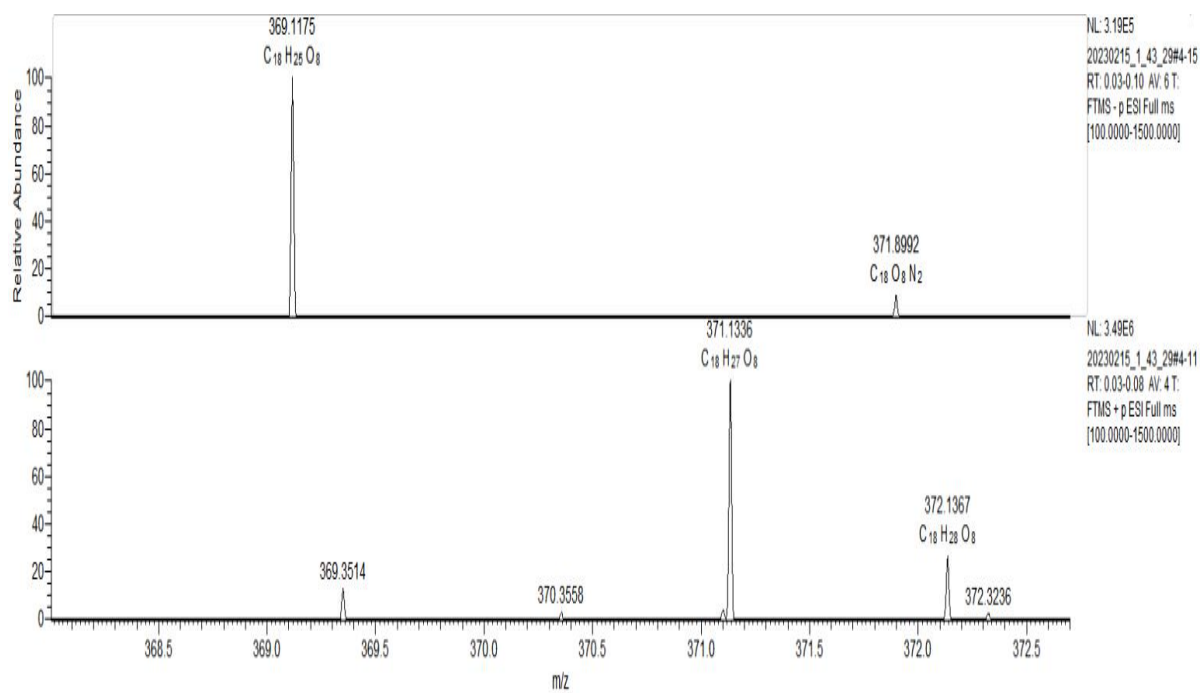

**Figure S38.** The HRESIMS spectrum of compound **5**

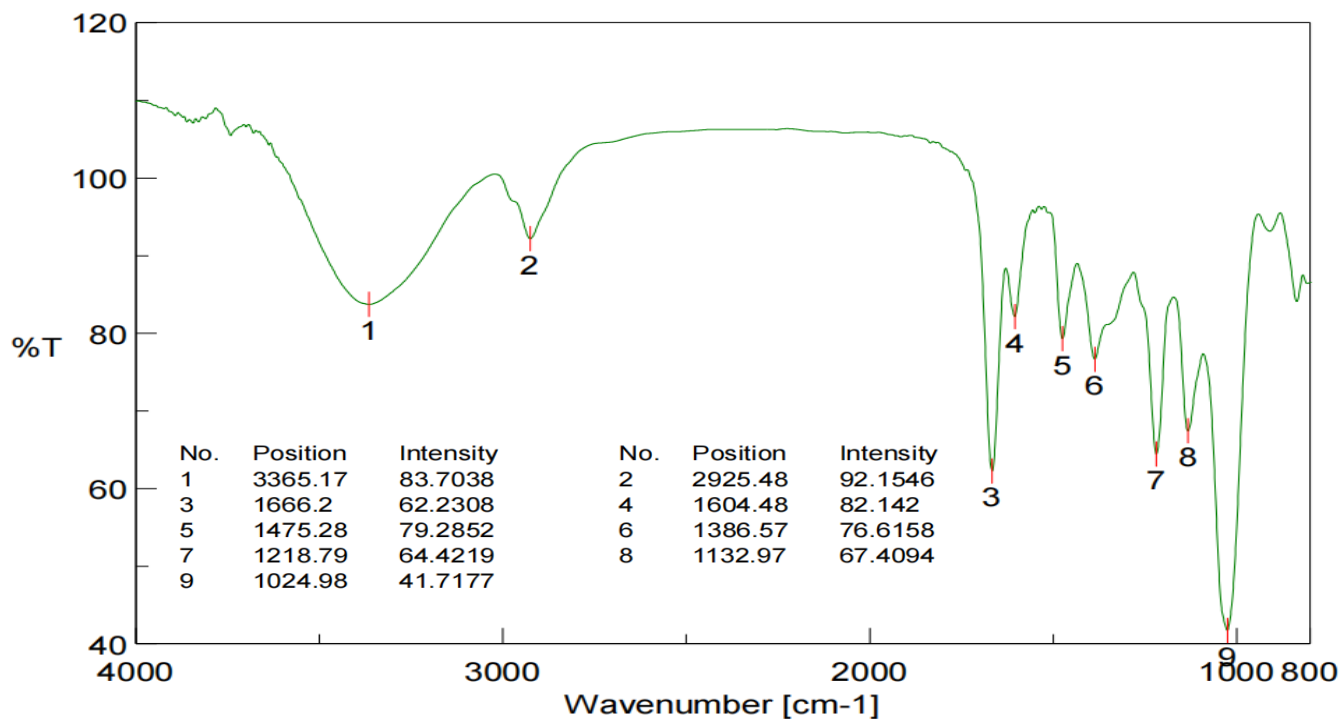

Figure S39. The UV spectrum of compound 5

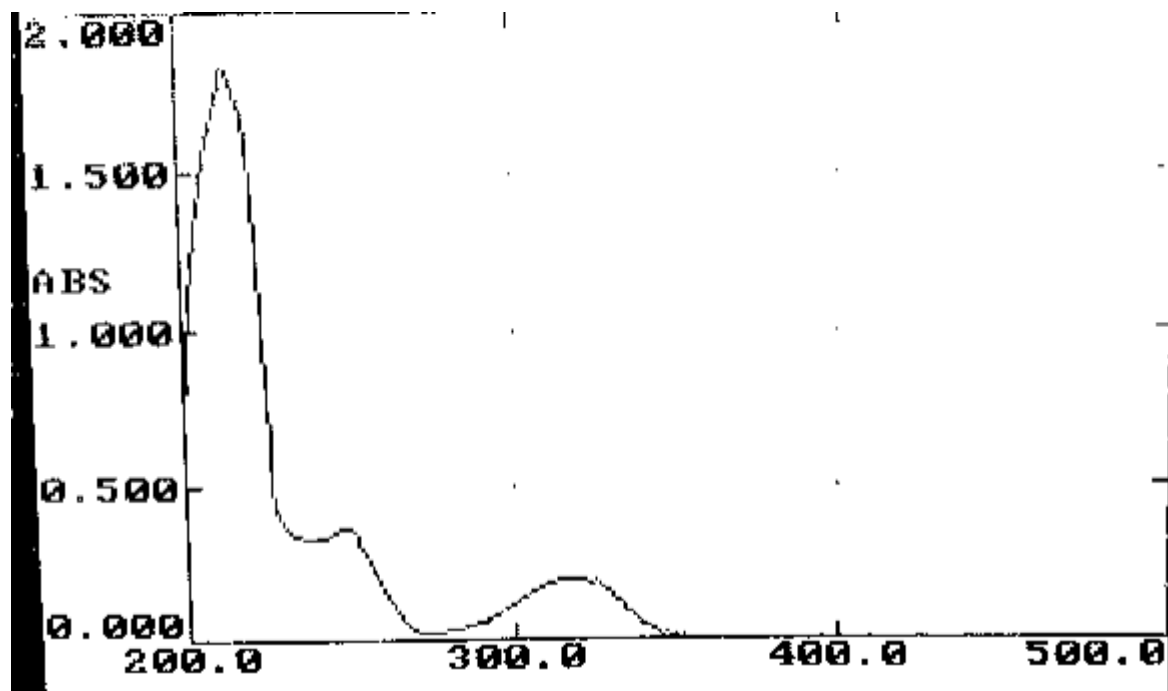

Figure S40. The UV spectrum of compound 5



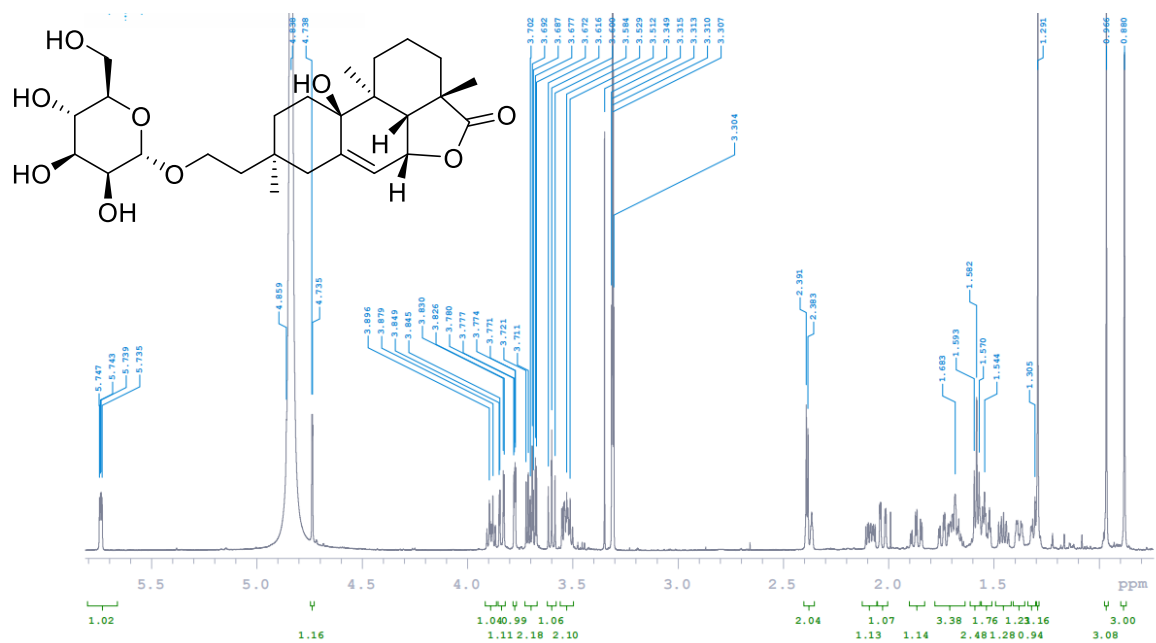

**Figure S41.** The  $^1\text{H}$  NMR (600 MHz,  $\text{CD}_3\text{OD}$ ) spectrum of compound **6**

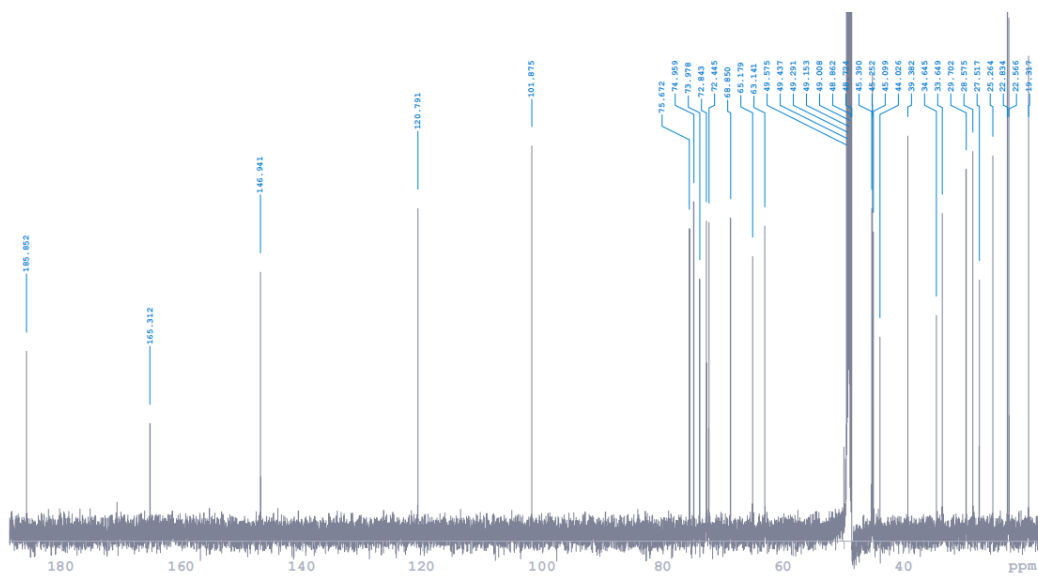

**Figure S42.** The  $^{13}\text{C}$  NMR (150 MHz,  $\text{CD}_3\text{OD}$ ) spectrum of compound **6**

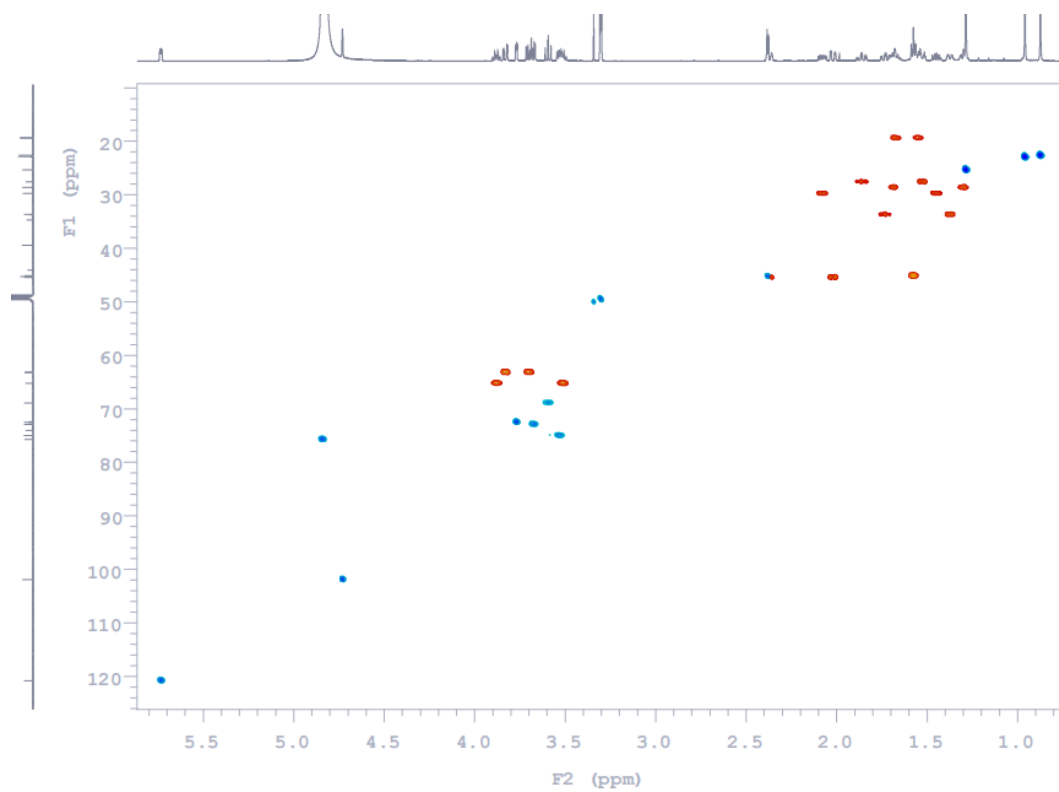

**Figure S43.** The HSQC (600 MHz,  $\text{CD}_3\text{OD}$ ) spectrum of compound **6**

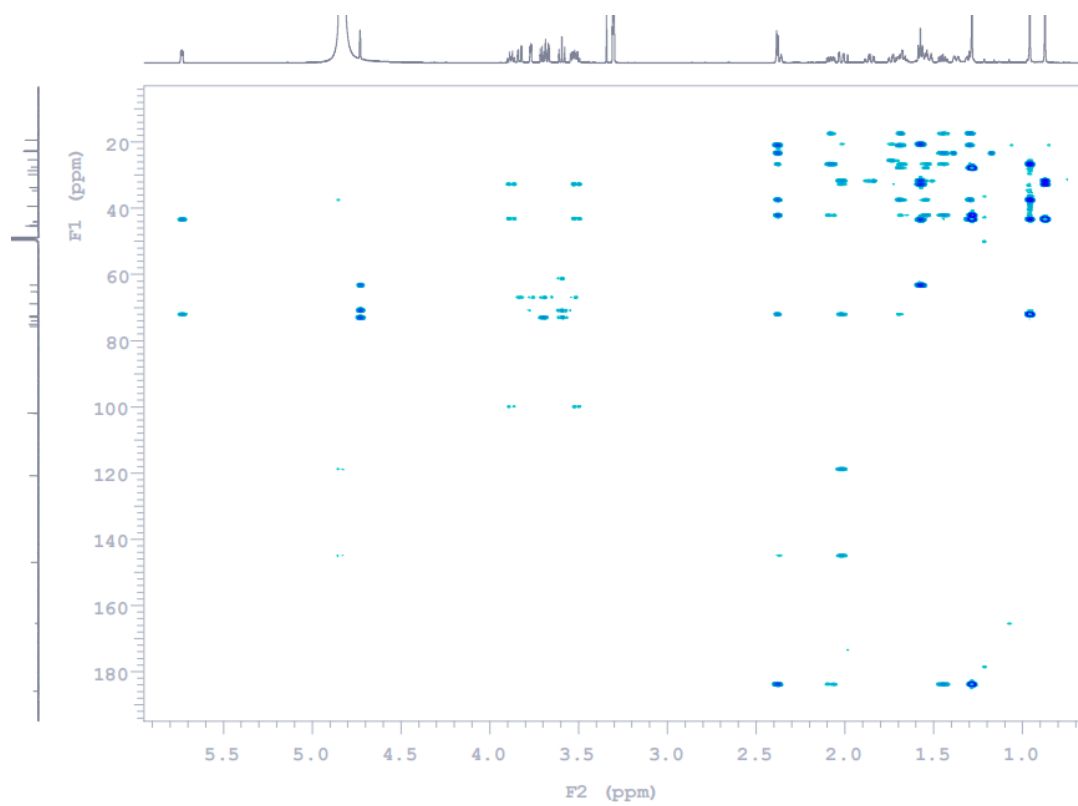

**Figure S44.** The HMBC (600 MHz,  $\text{CD}_3\text{OD}$ ) spectrum of compound **6**

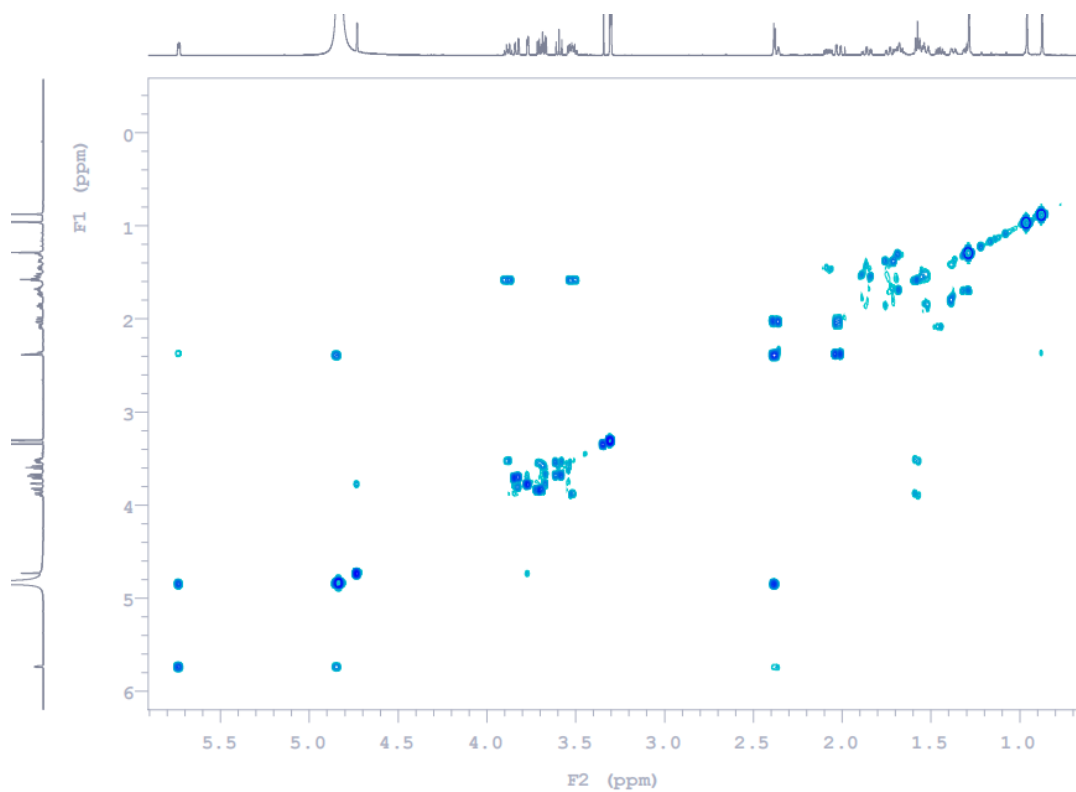

**Figure S45.** The COSY (600 MHz, CD<sub>3</sub>OD) spectrum of compound **6**

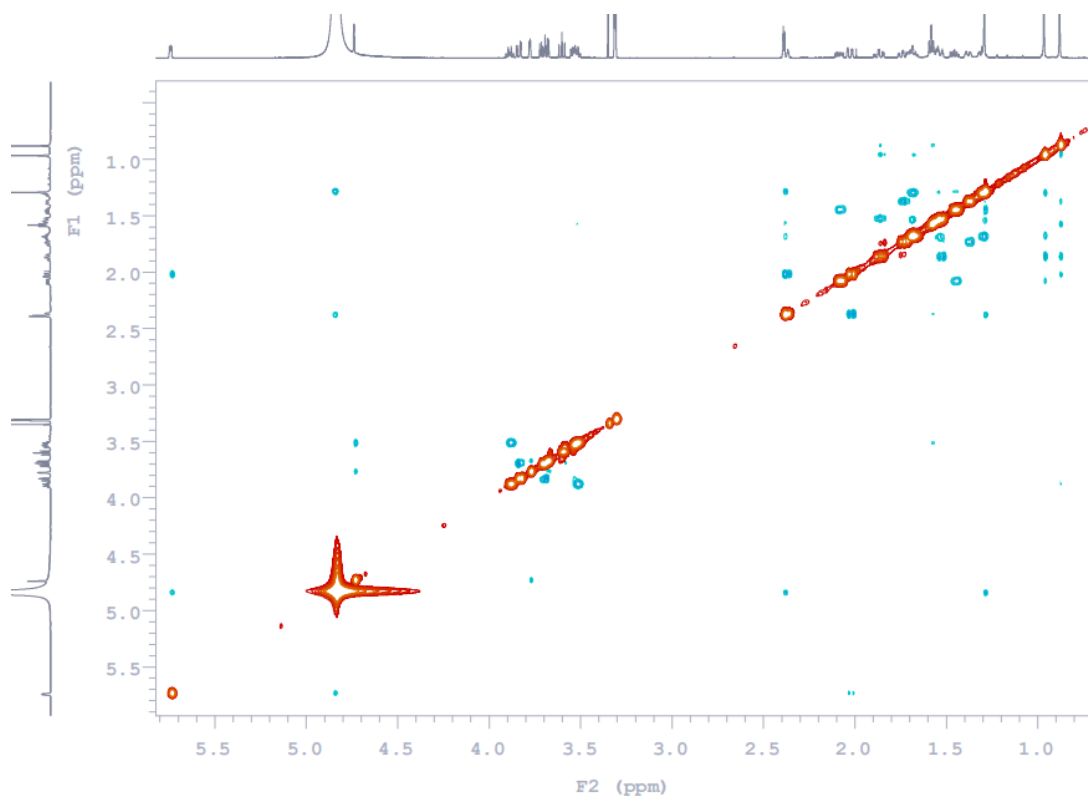

**Figure S46.** The NOESY (600 MHz, CD<sub>3</sub>OD) spectrum of compound **6**

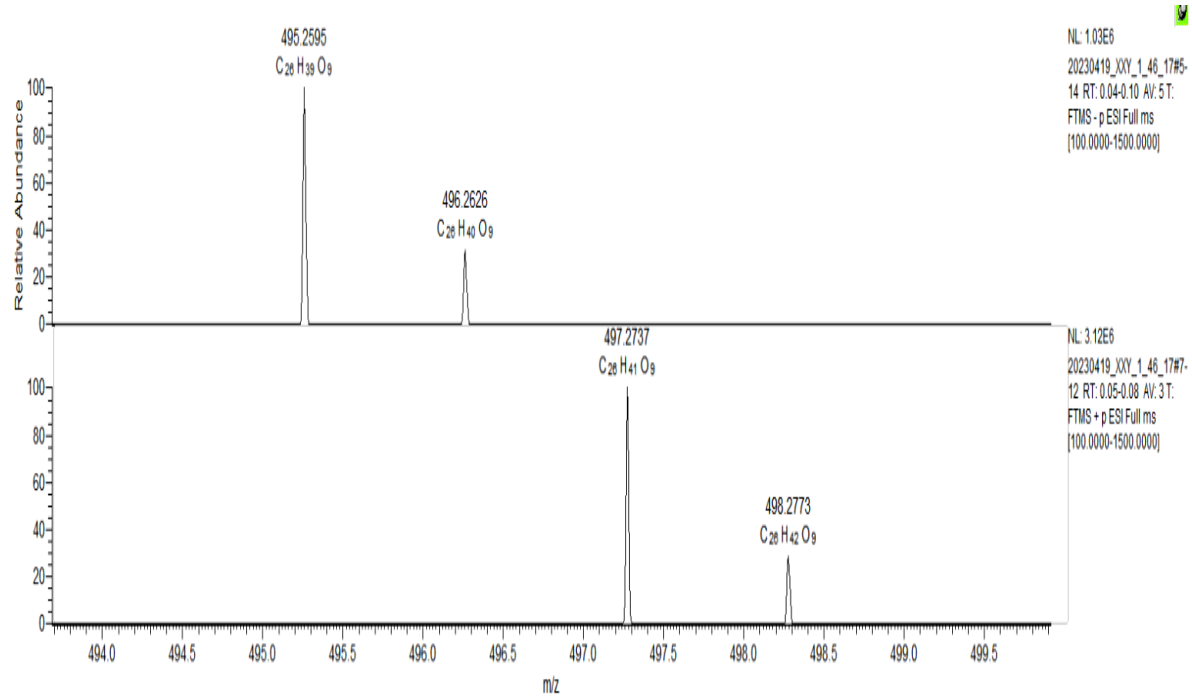

**Figure S47.** The HRESIMS spectrum of compound **6**

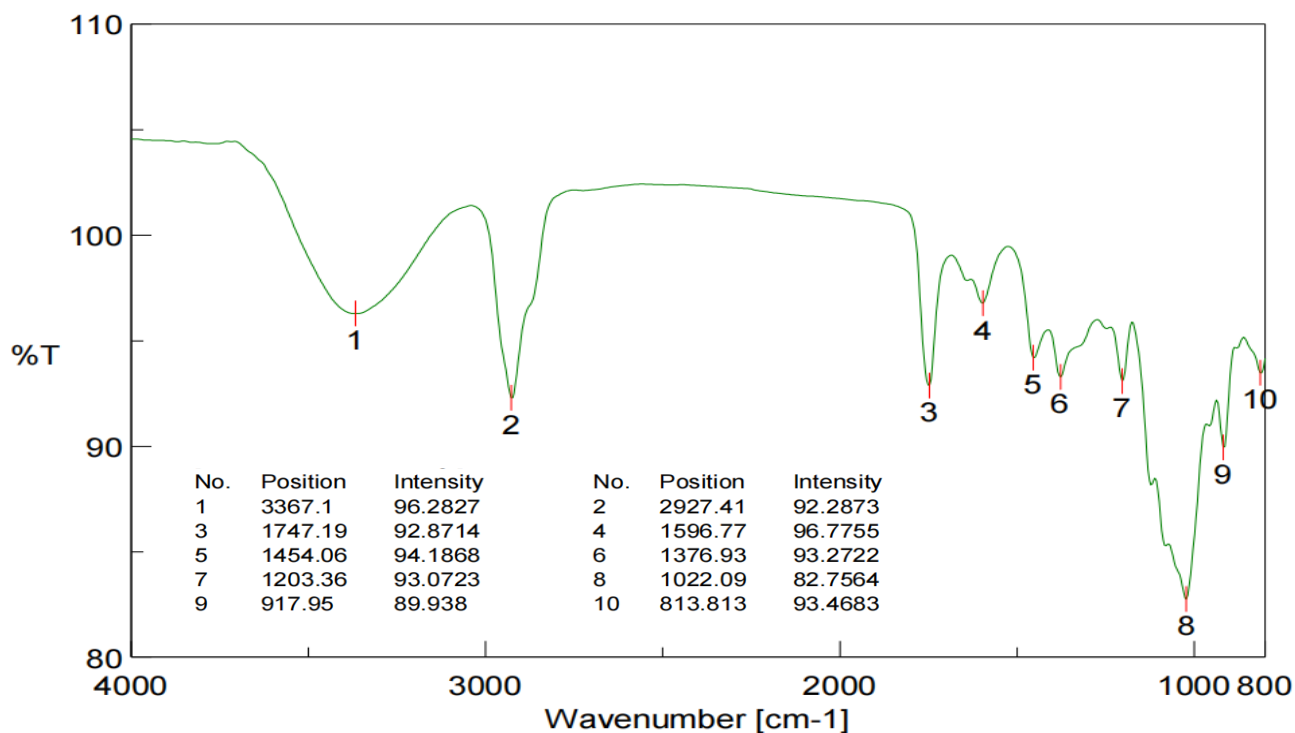

**Figure S48.** The IR spectrum of compound **6**

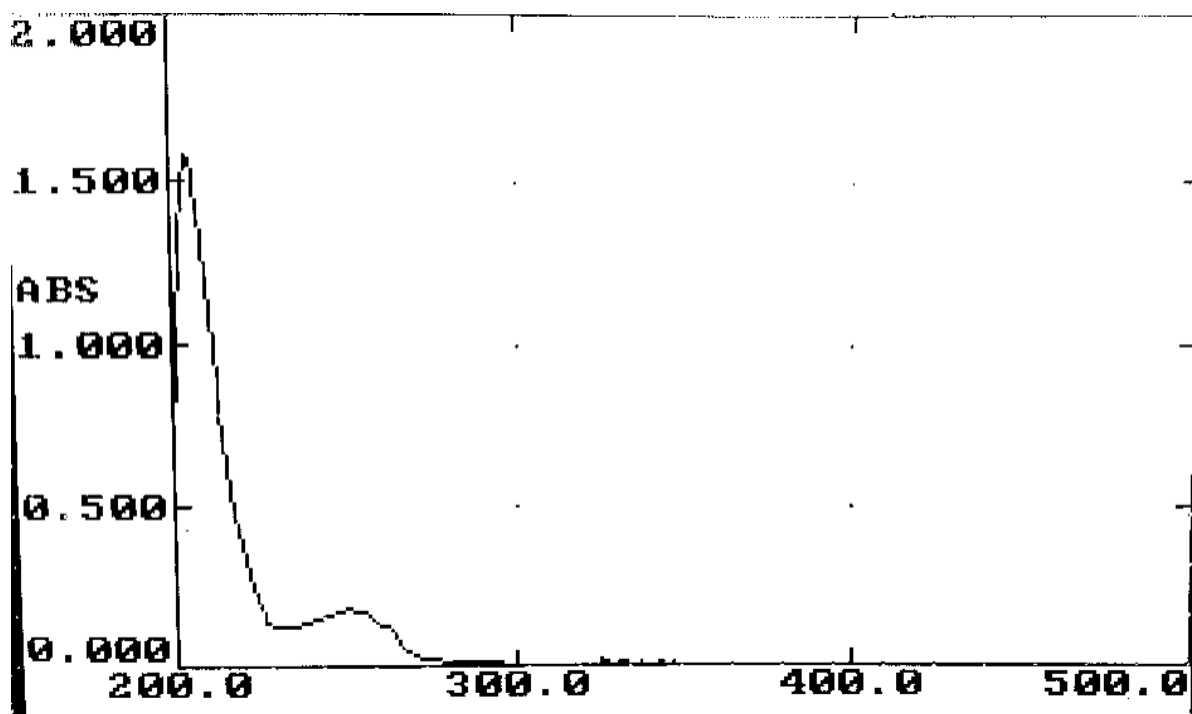

Figure S49. The UV spectrum of compound 6



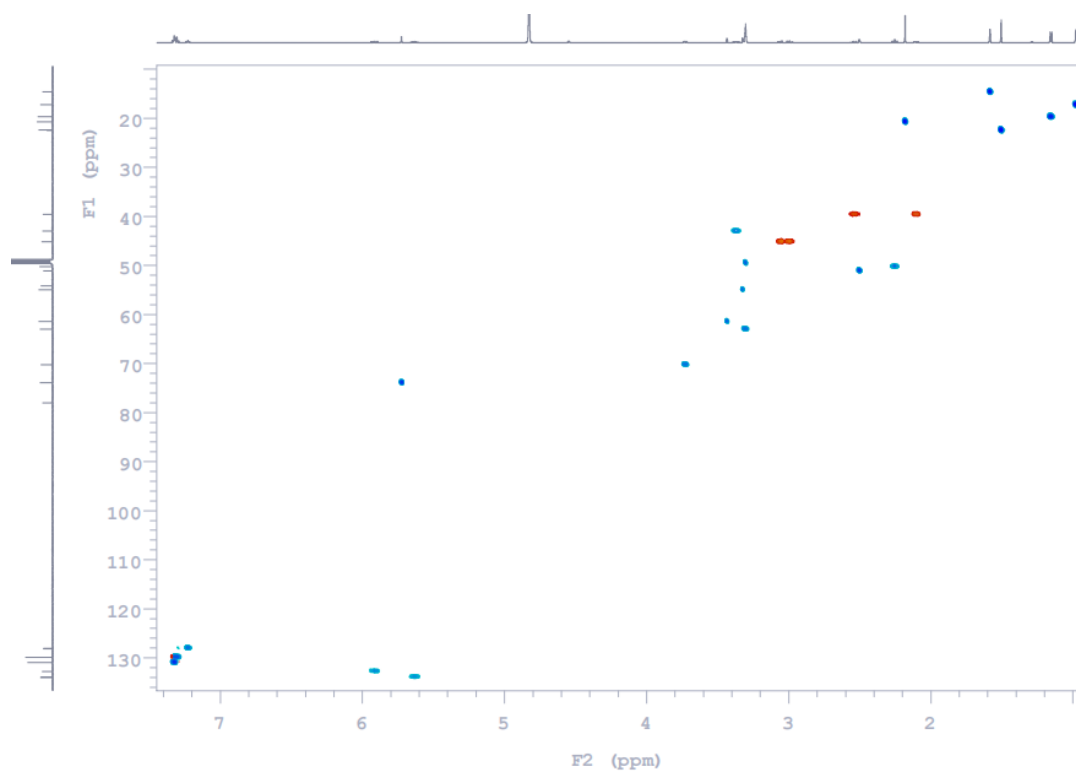

**Figure S52.** The HSQC (600 MHz, CD<sub>3</sub>OD) spectrum of compound **7**

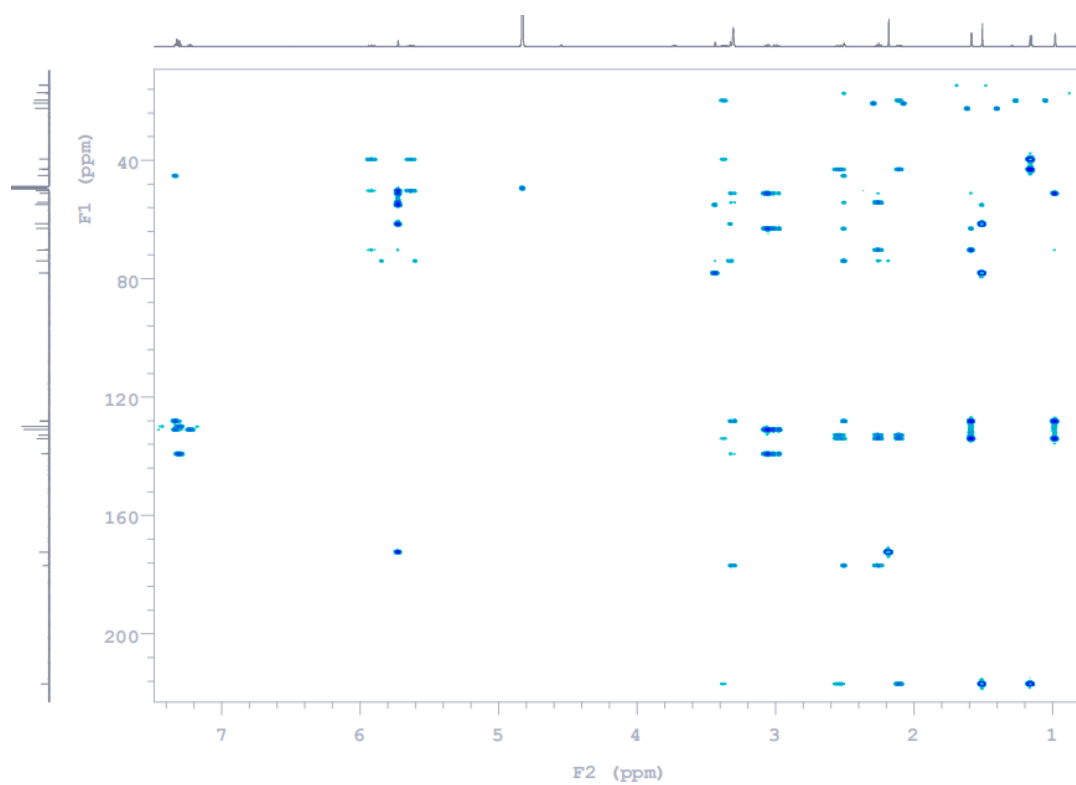

**Figure S53.** The HMBC (600 MHz, CD<sub>3</sub>OD) spectrum of compound **7**

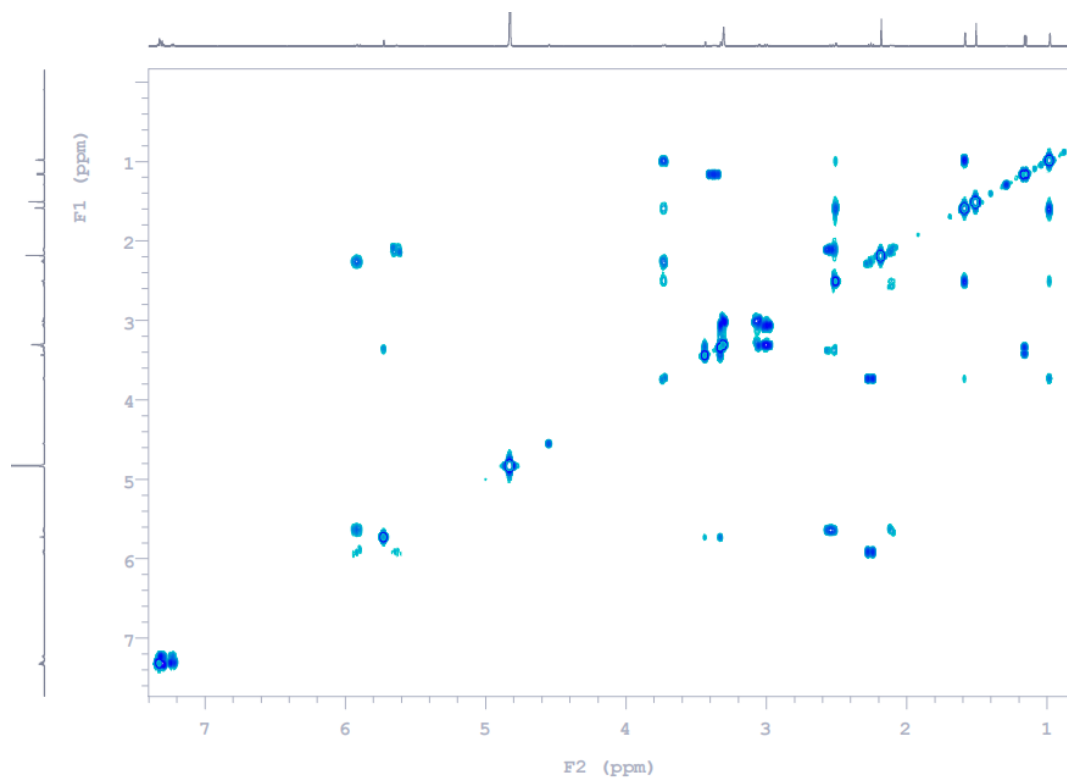

**Figure S54.** The COSY (600 MHz, CD<sub>3</sub>OD) spectrum of compound 7

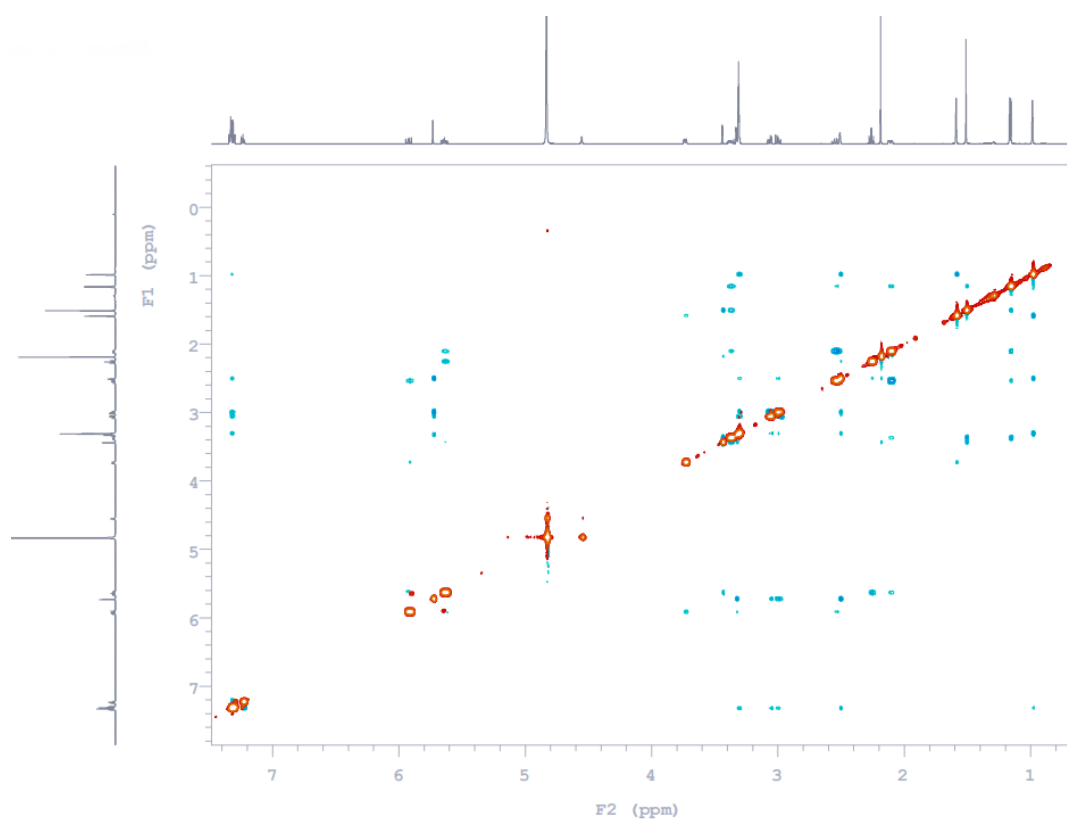

**Figure S55.** The NOESY (600 MHz, CD<sub>3</sub>OD) spectrum of compound 7



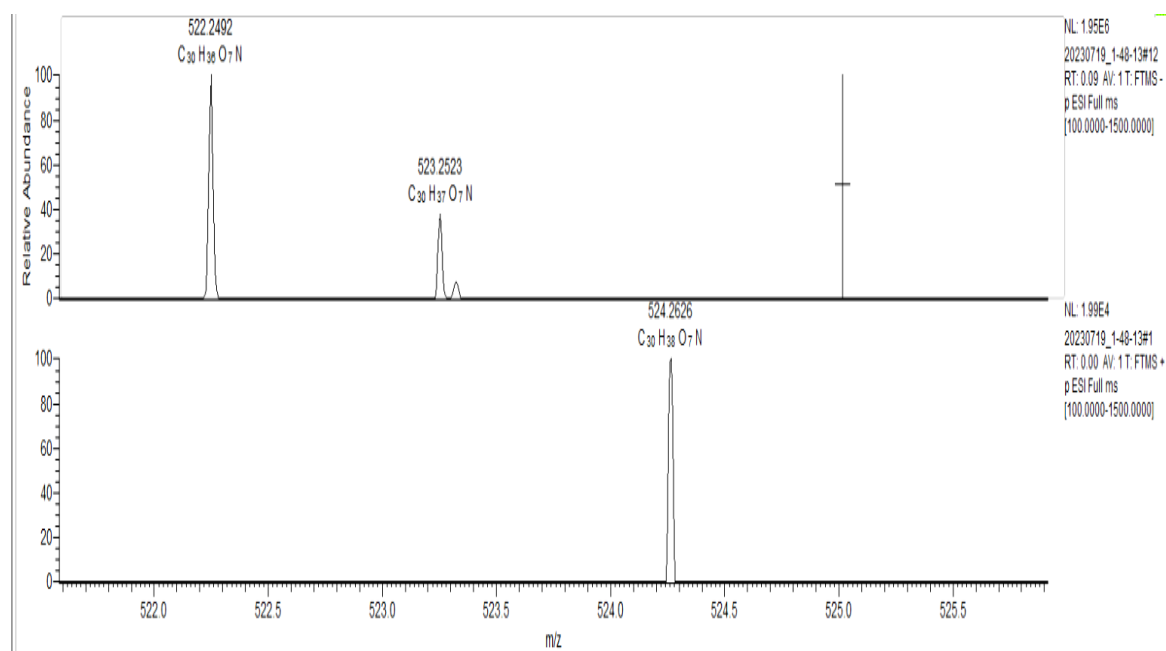

**Figure S56.** The HRESIMS spectrum of compound 7

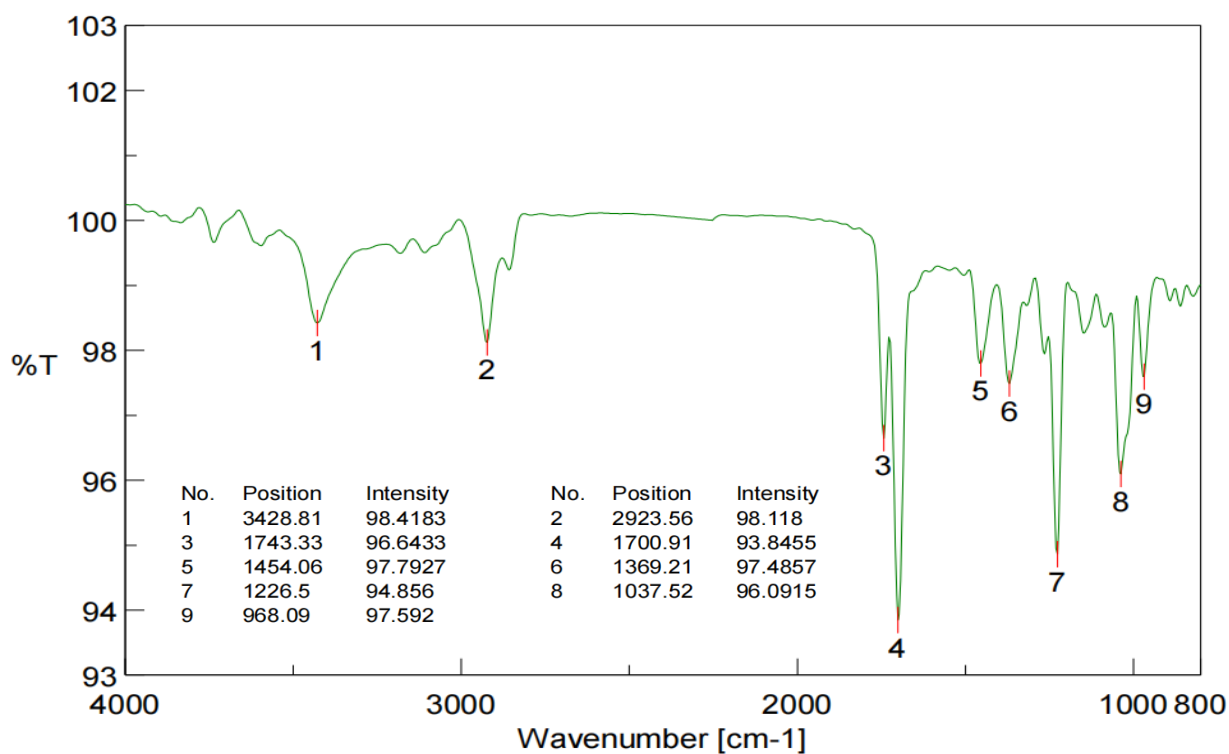

**Figure S57.** The IR spectrum of compound 7

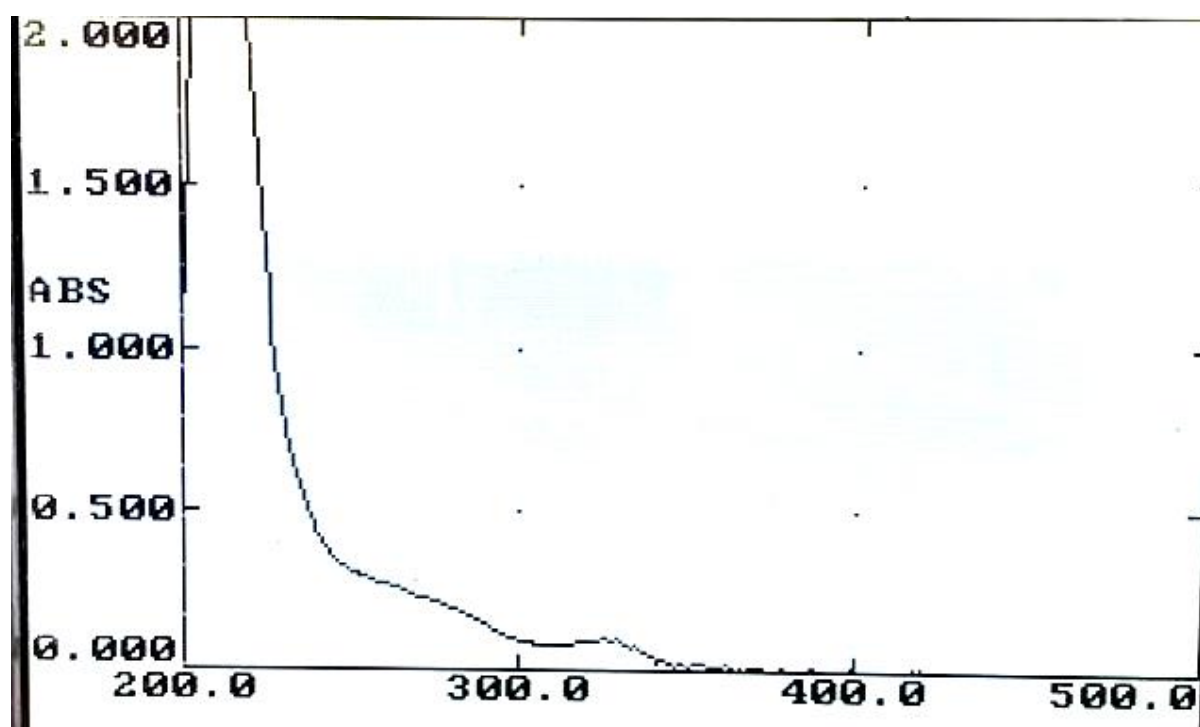

Figure S58. The UV spectrum of compound 7

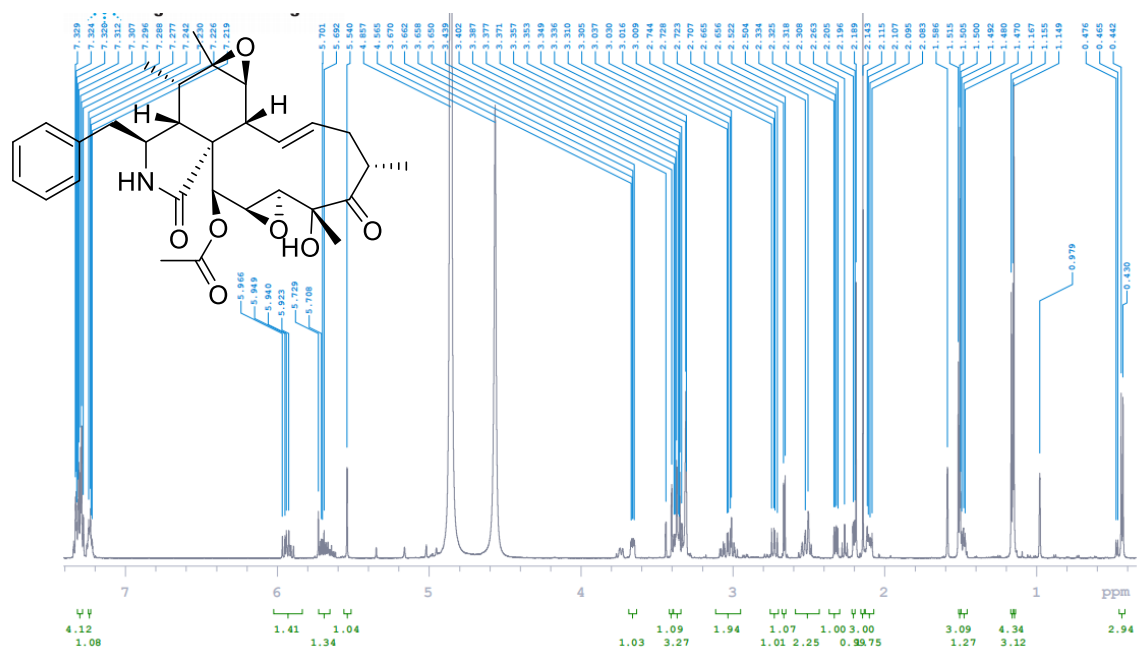

**Figure S59. The  $^1\text{H}$  NMR (600 MHz,  $\text{CD}_3\text{OD}$ ) spectrum of compound **8****

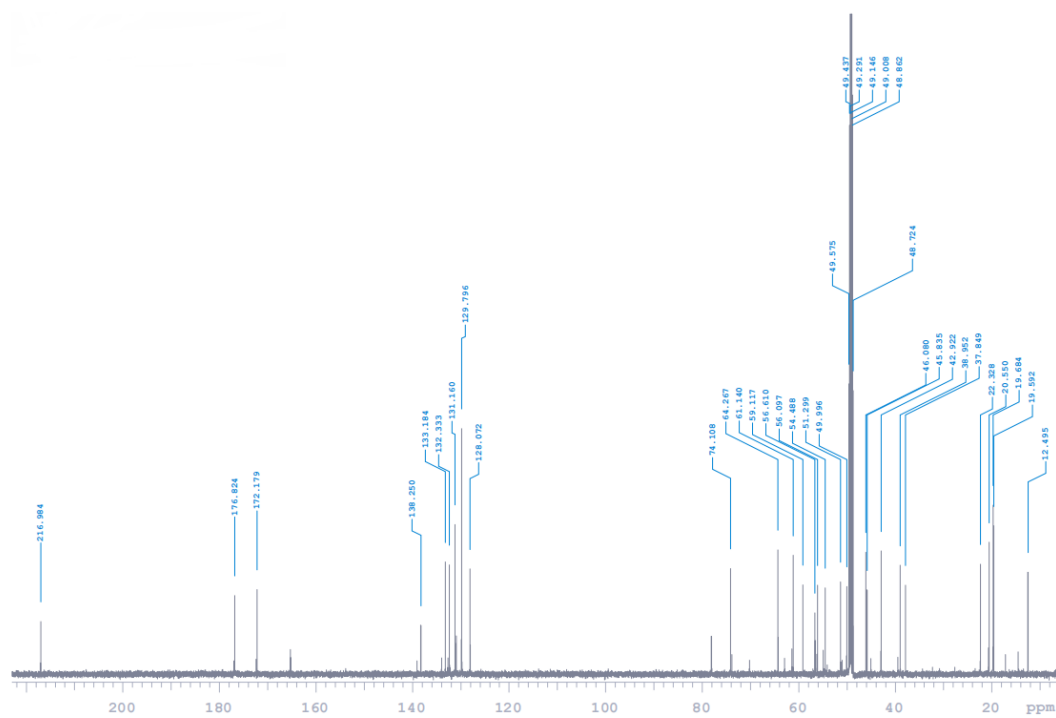

**Figure S60. The  $^{13}\text{C}$  NMR (150 MHz,  $\text{CD}_3\text{OD}$ ) spectrum of compound **8****

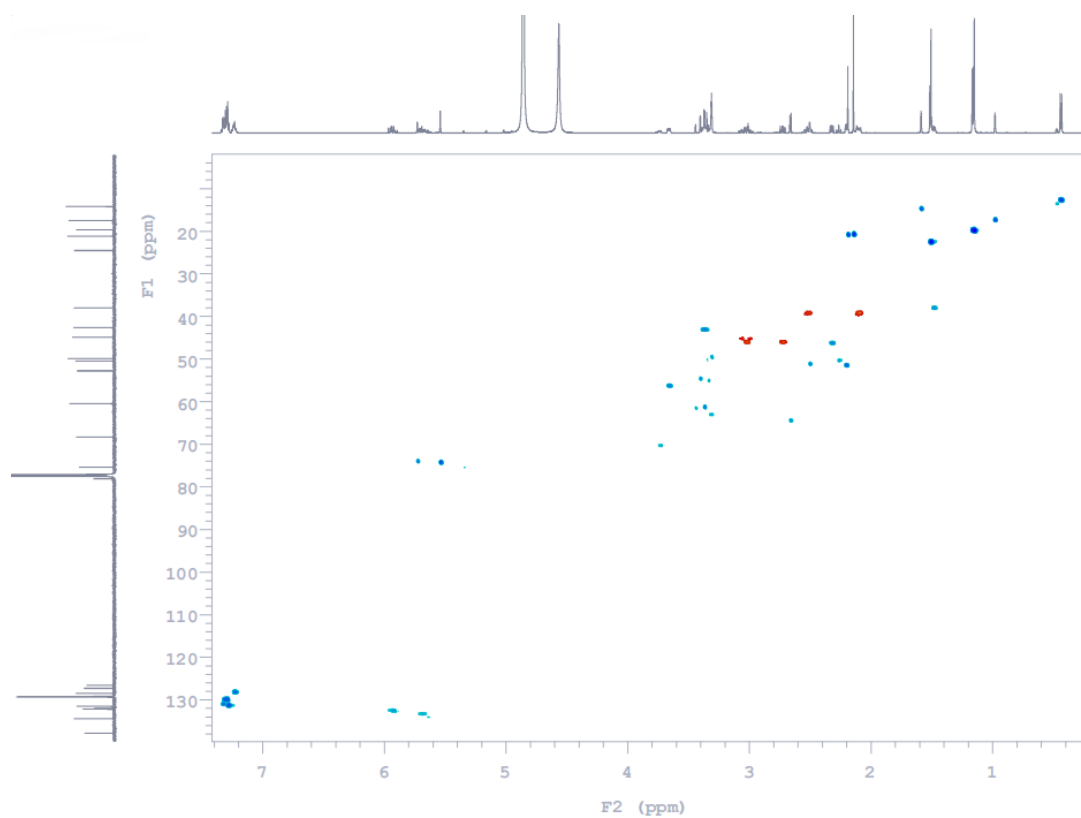

**Figure S61.** The HSQC (600 MHz, CD<sub>3</sub>OD) spectrum of compound **8**

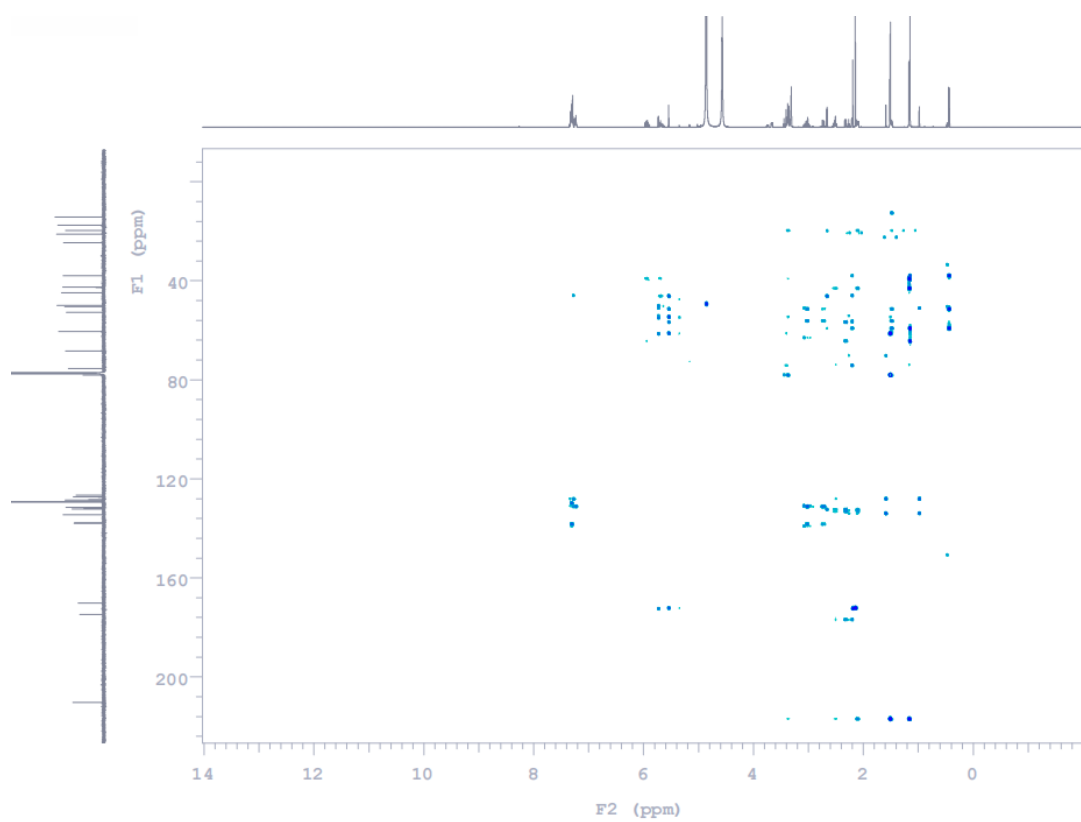

**Figure S62.** The HMBC (600 MHz, CD<sub>3</sub>OD) spectrum of compound **8**

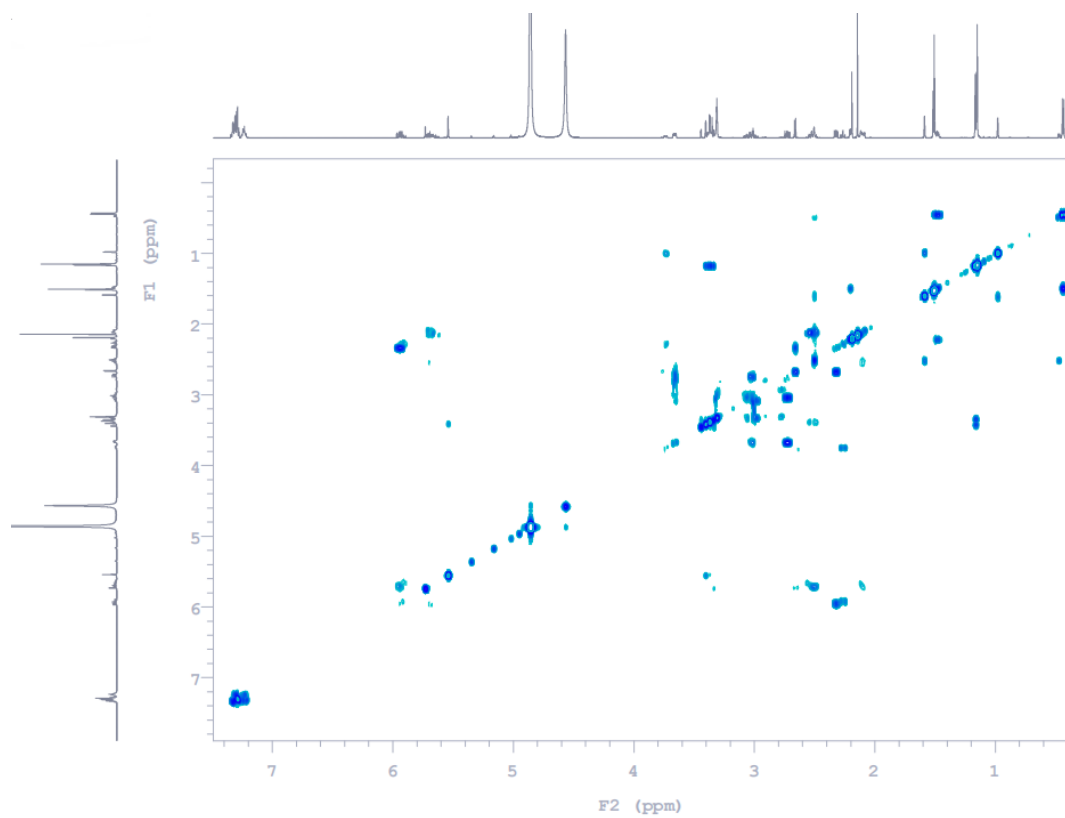

**Figure S63.** The COSY (600 MHz, CD<sub>3</sub>OD) spectrum of compound **8**

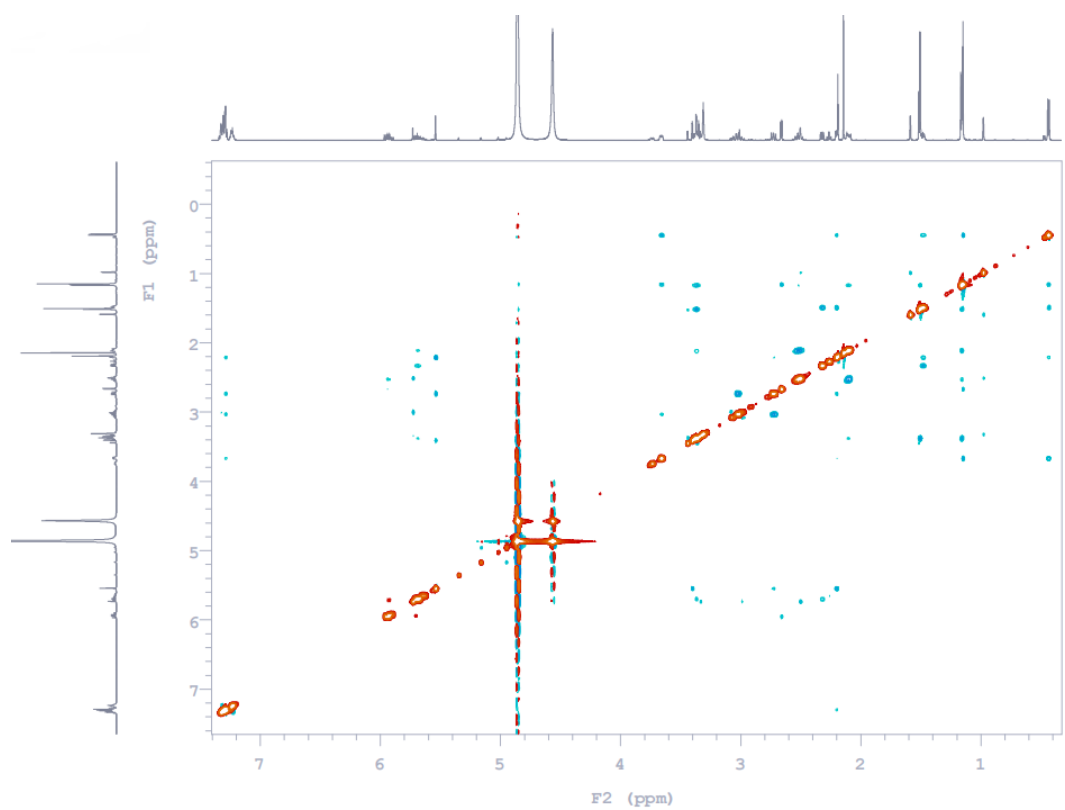

**Figure S64.** The NOESY (600 MHz, CD<sub>3</sub>OD) spectrum of compound **8**

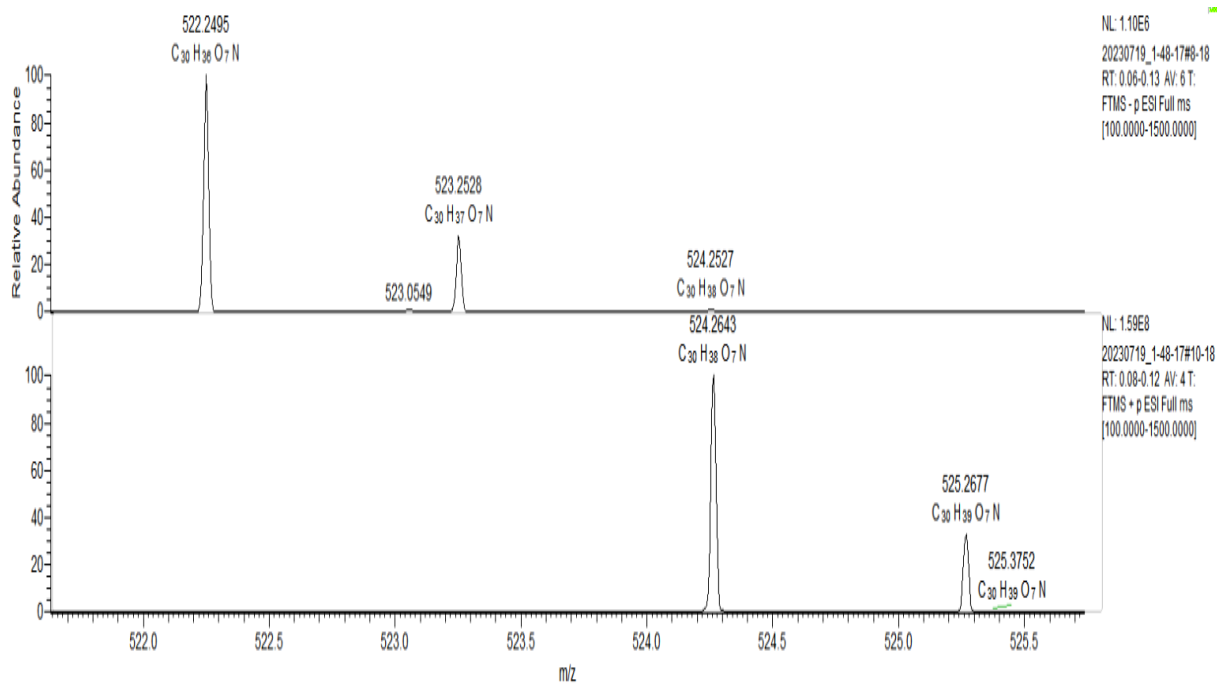

Figure S65. The HRESIMS spectrum of compound 8

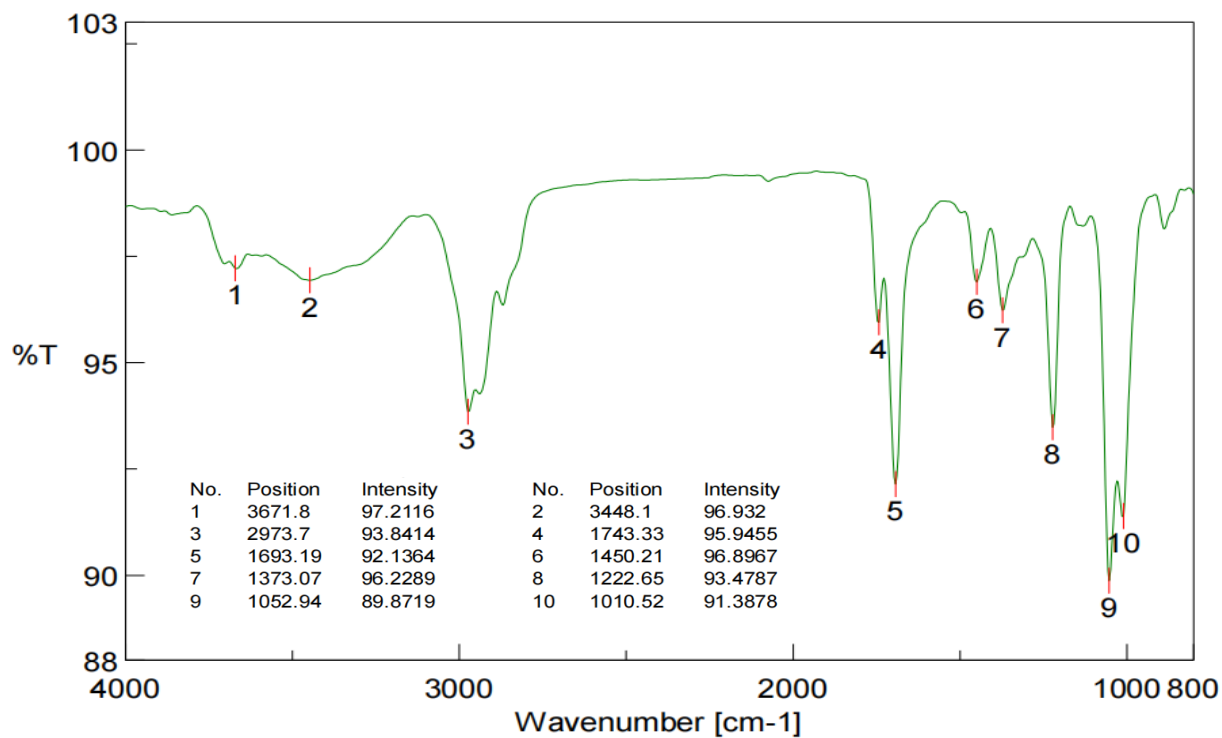

Figure S66. The IR spectrum of compound 8

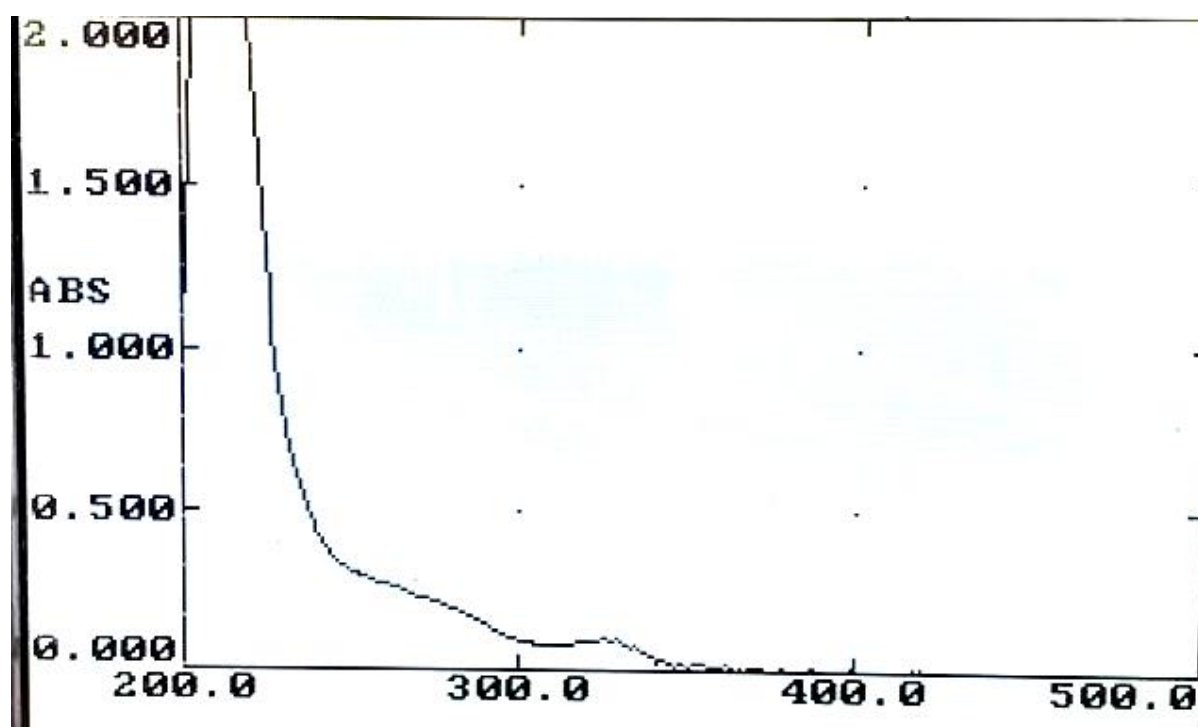

Figure S67. The UV spectrum of compound 8

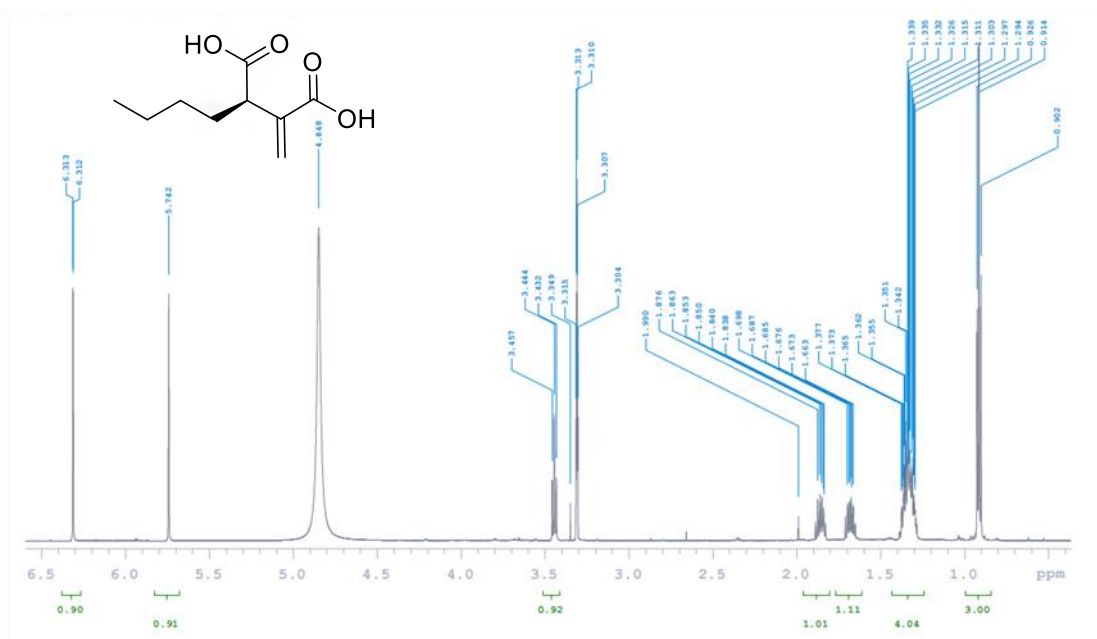

Figure S68. The <sup>1</sup>H NMR (600 MHz, CD<sub>3</sub>OD) spectrum of compound 9

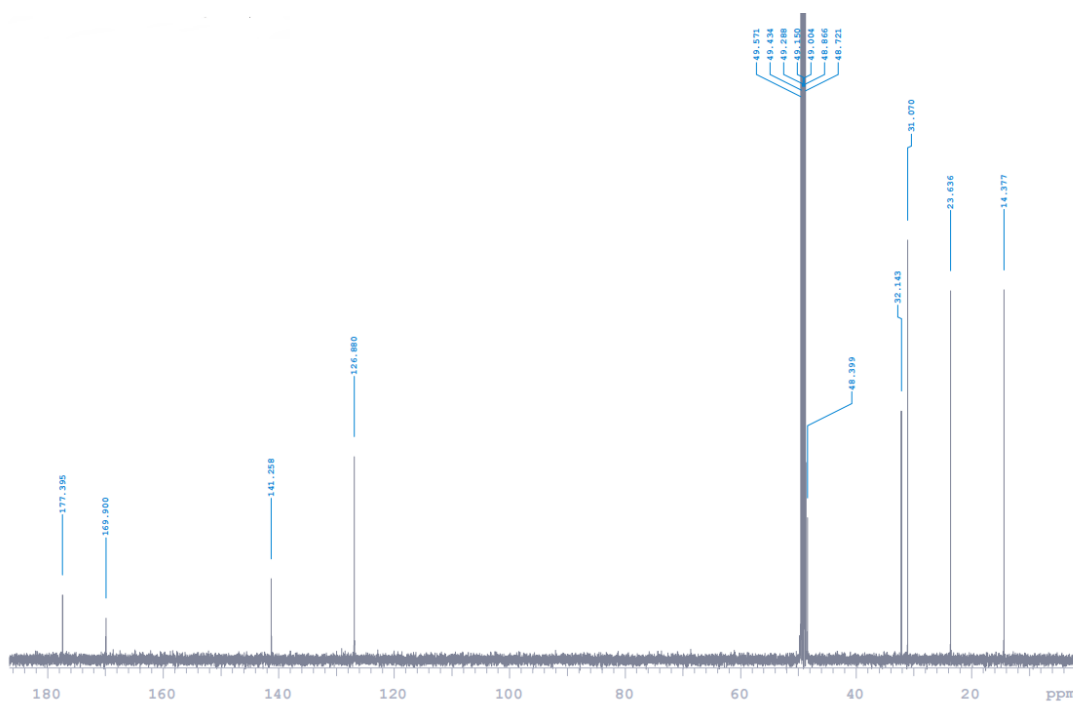

Figure S69. The <sup>13</sup>C NMR (150 MHz, CD<sub>3</sub>OD) spectrum of compound 9



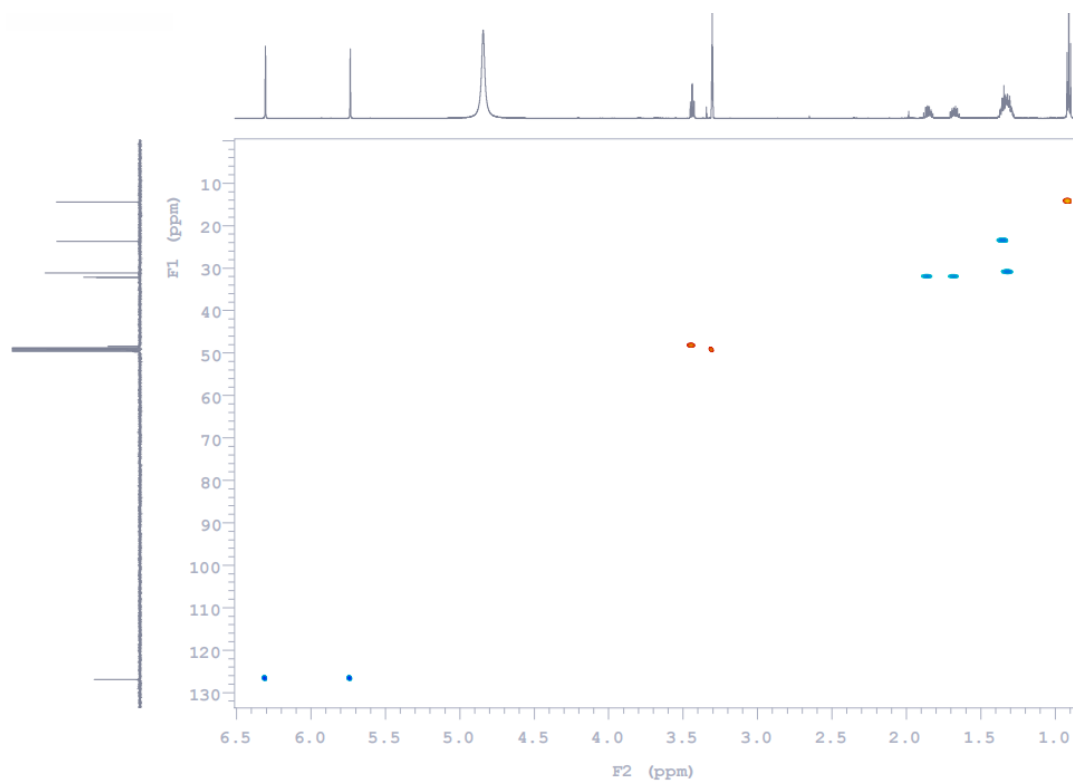

**Figure S70.** The HSQC (600 MHz,  $\text{CD}_3\text{OD}$ ) spectrum of compound **9**

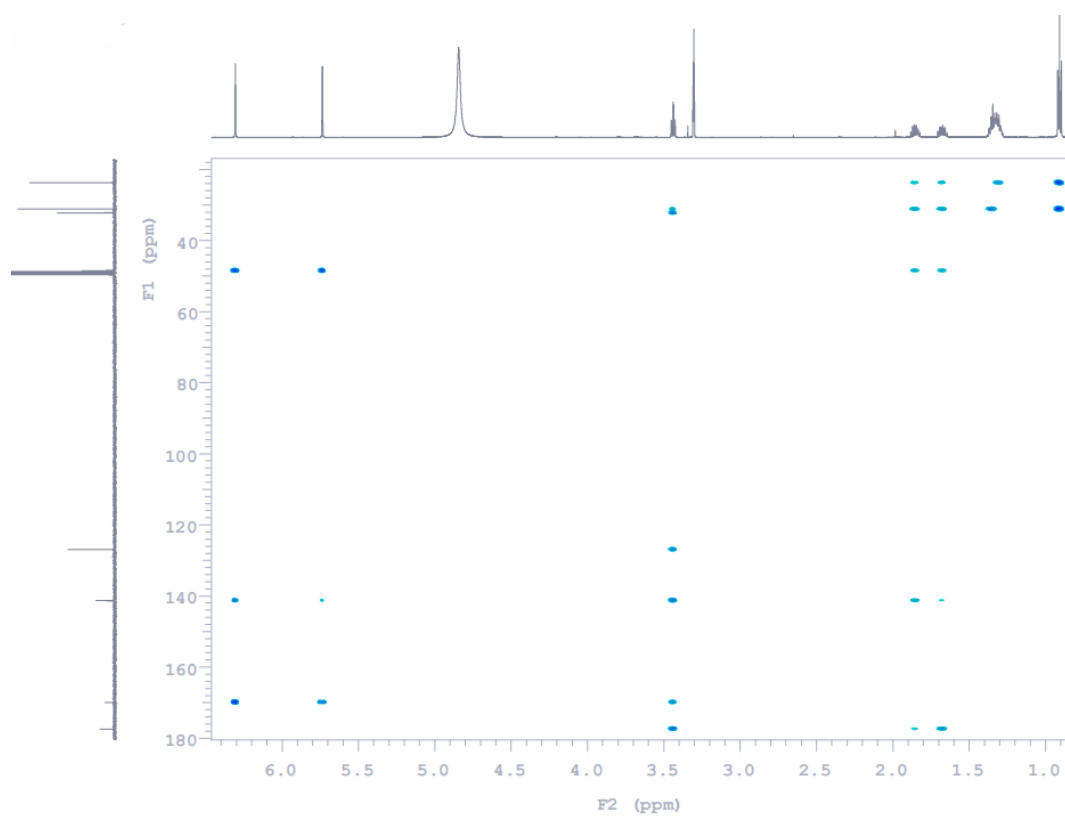

**Figure S71.** The HMBC (600 MHz,  $\text{CD}_3\text{OD}$ ) spectrum of compound **9**

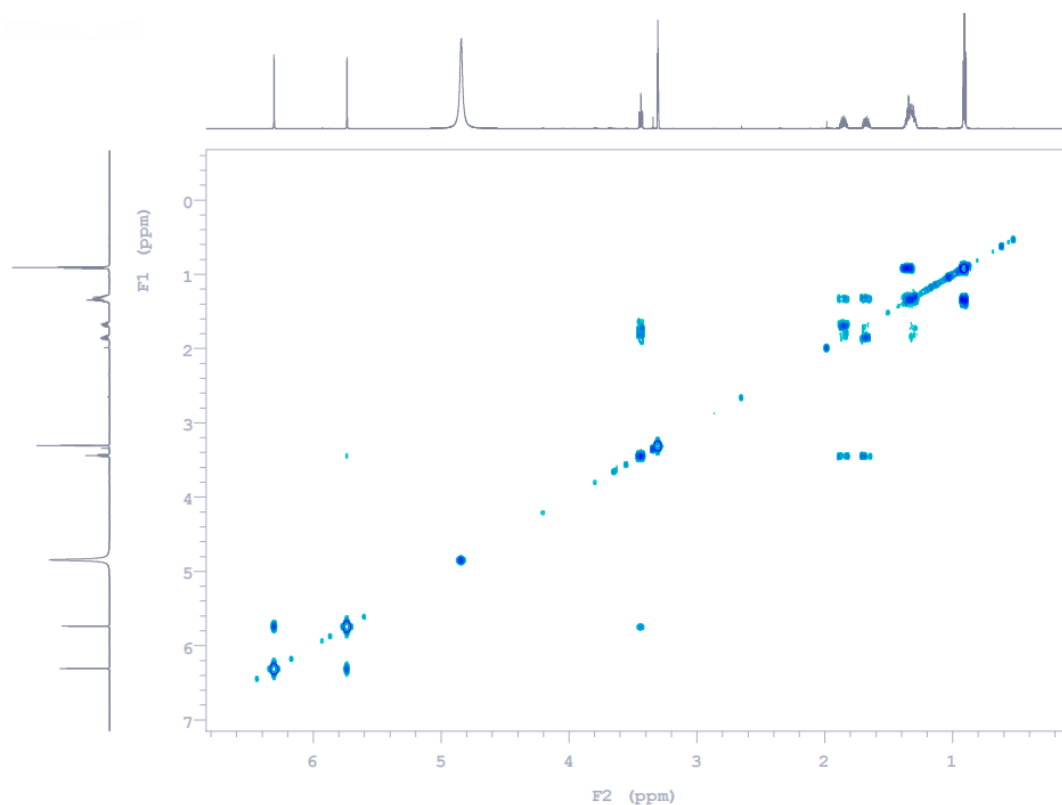

**Figure S72.** The COSY (600 MHz, CD<sub>3</sub>OD) spectrum of compound **9**

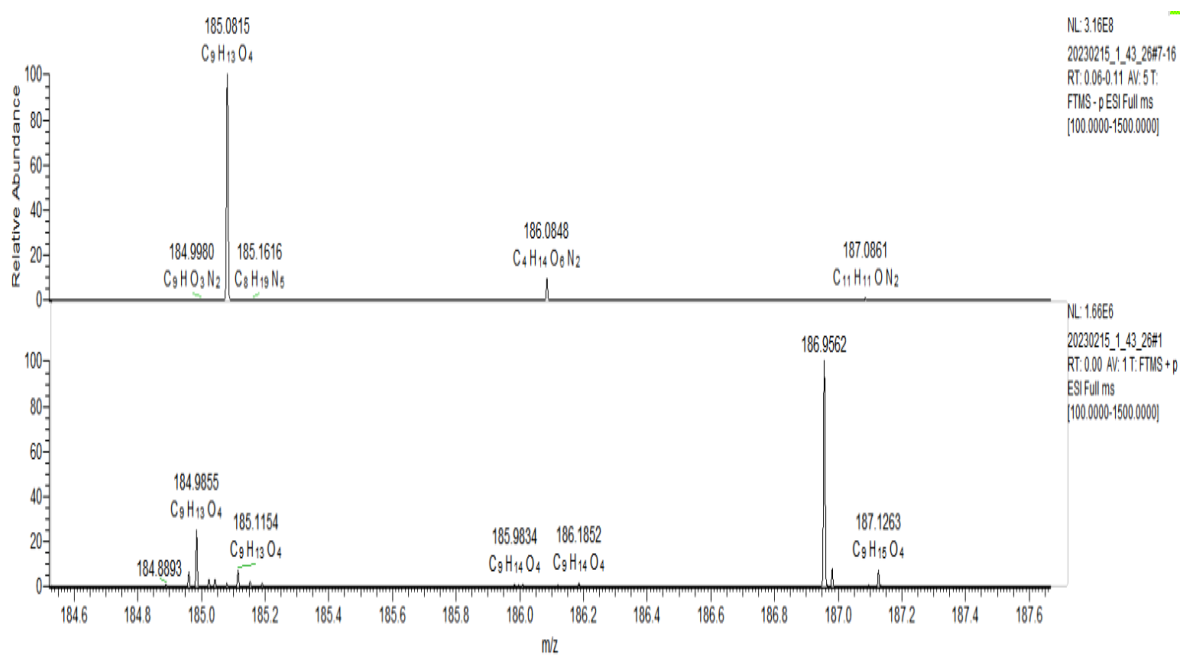

**Figure S73.** The HRESIMS spectrum of compound **9**

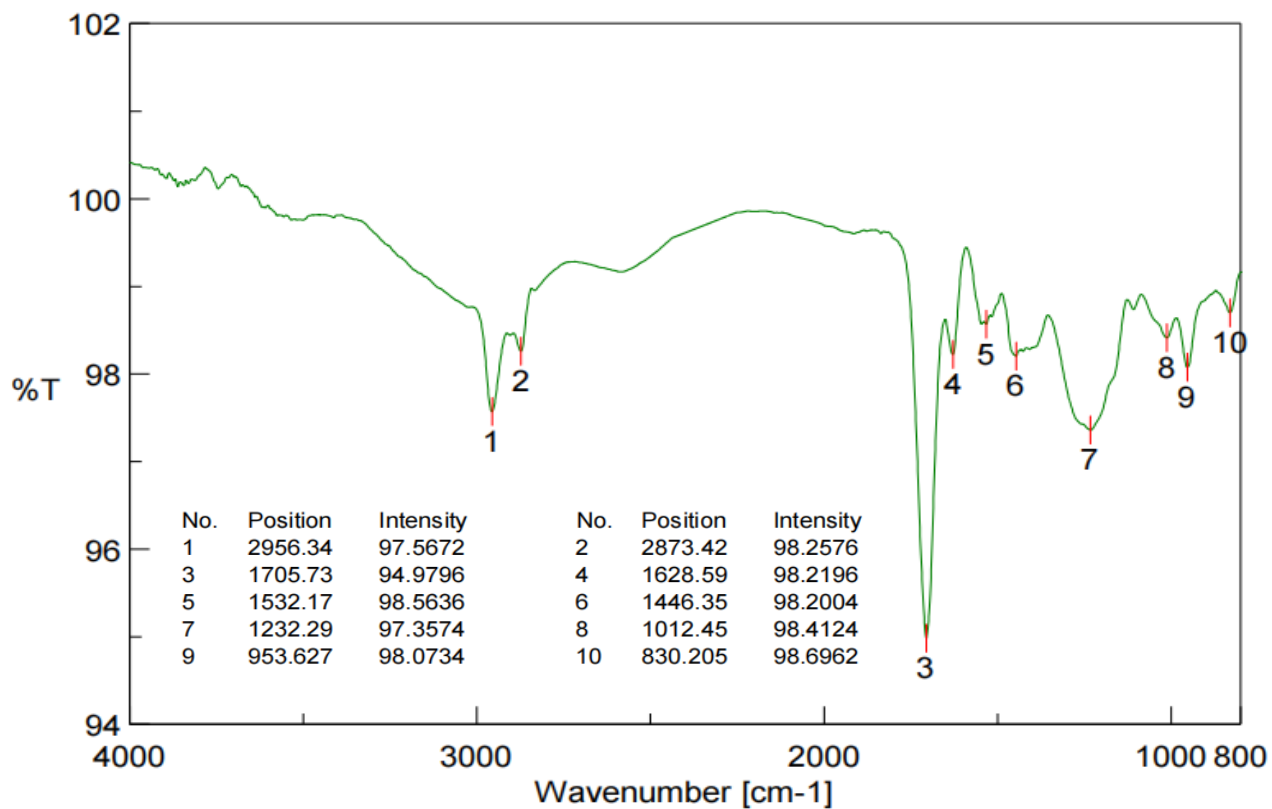

Figure S74. The IR spectrum of compound 9

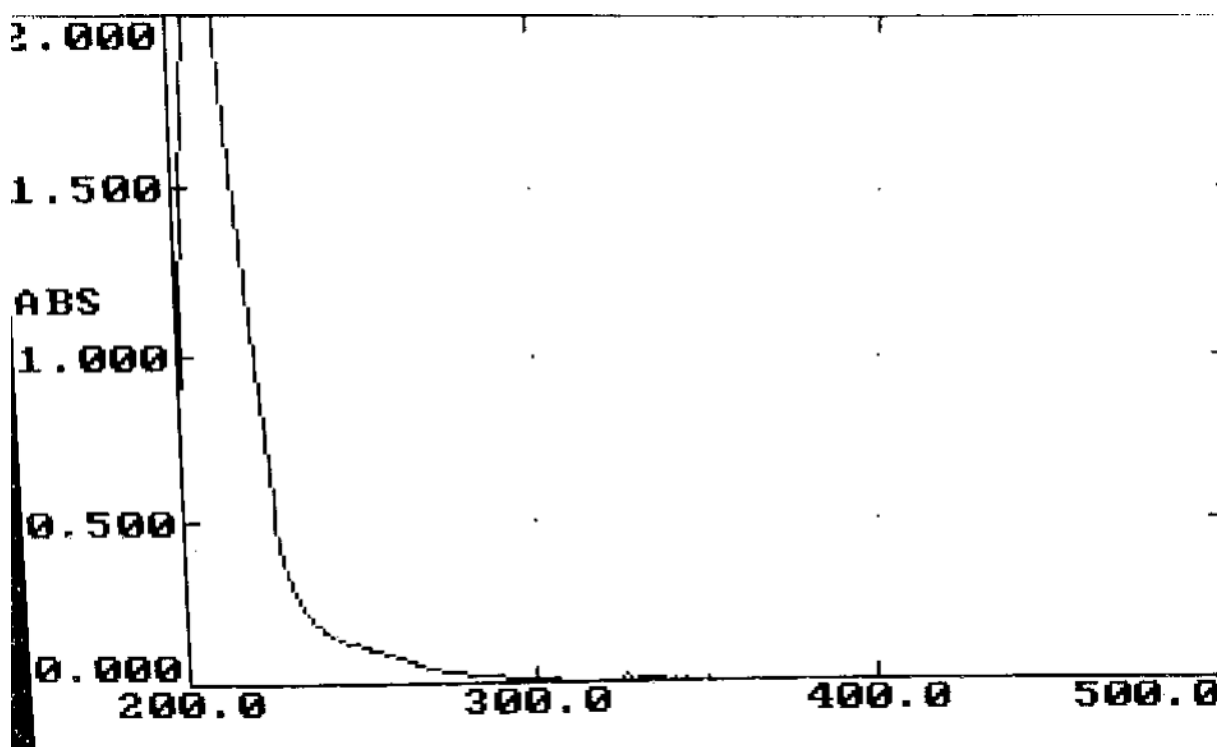

Figure S75. The UV spectrum of compound 9

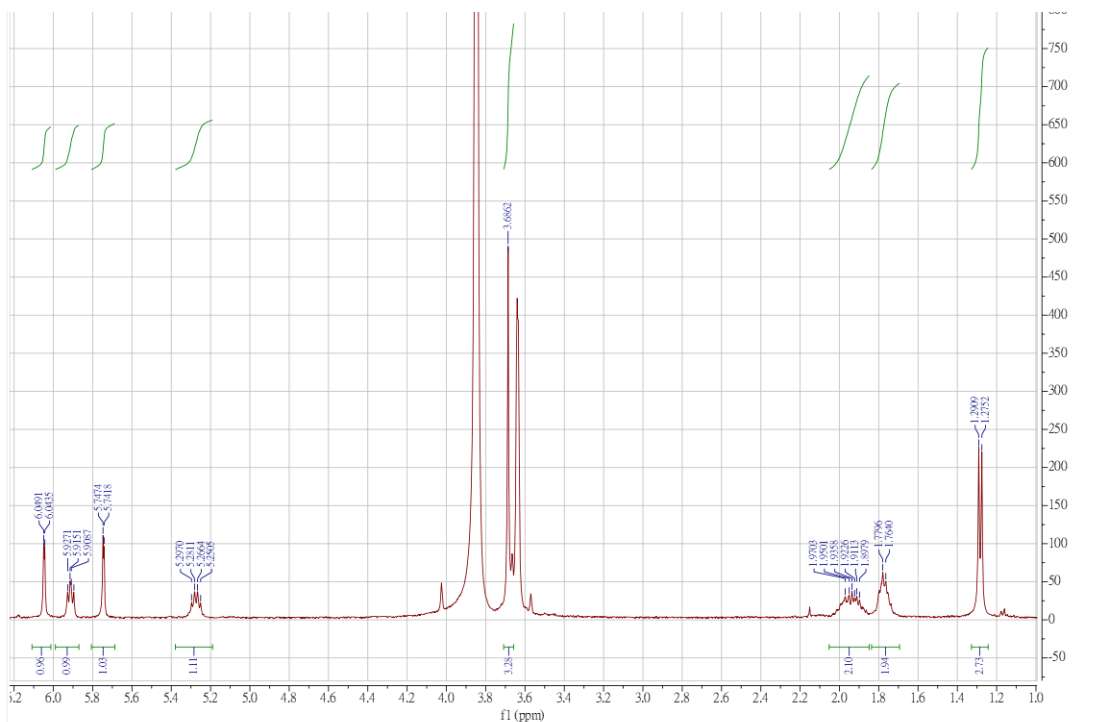

**Figure S76.** The  $^1\text{H}$  NMR (400 MHz,  $\text{C}_5\text{D}_5\text{N}$ ) spectrum of compound 7R, 10R-MTPA ester of **2** (**2S**)

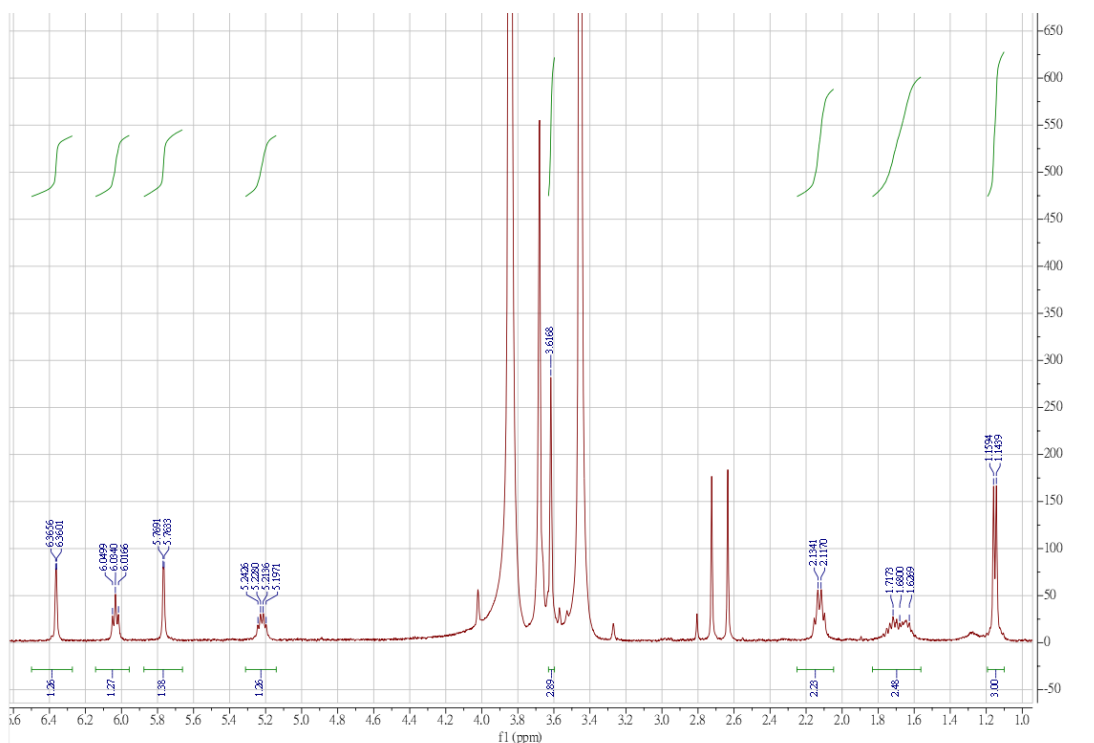

**Figure S77.** The  $^1\text{H}$  NMR (400 MHz,  $\text{C}_5\text{D}_5\text{N}$ ) spectrum of compound 7R, 10R-MTPA ester of **2** (**2R**)

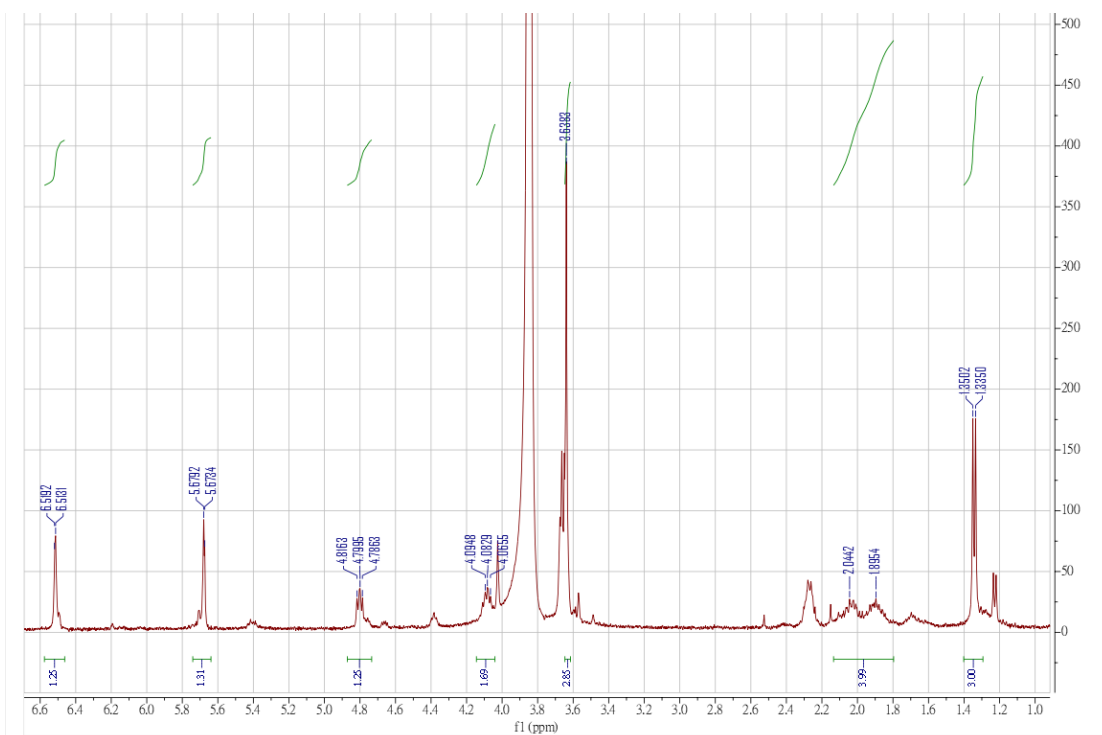

**Figure S78.** The  $^1\text{H}$  NMR (400 MHz,  $\text{C}_5\text{D}_5\text{N}$ ) spectrum of compound 7S, 10R -MTPA ester of 3 (3S)

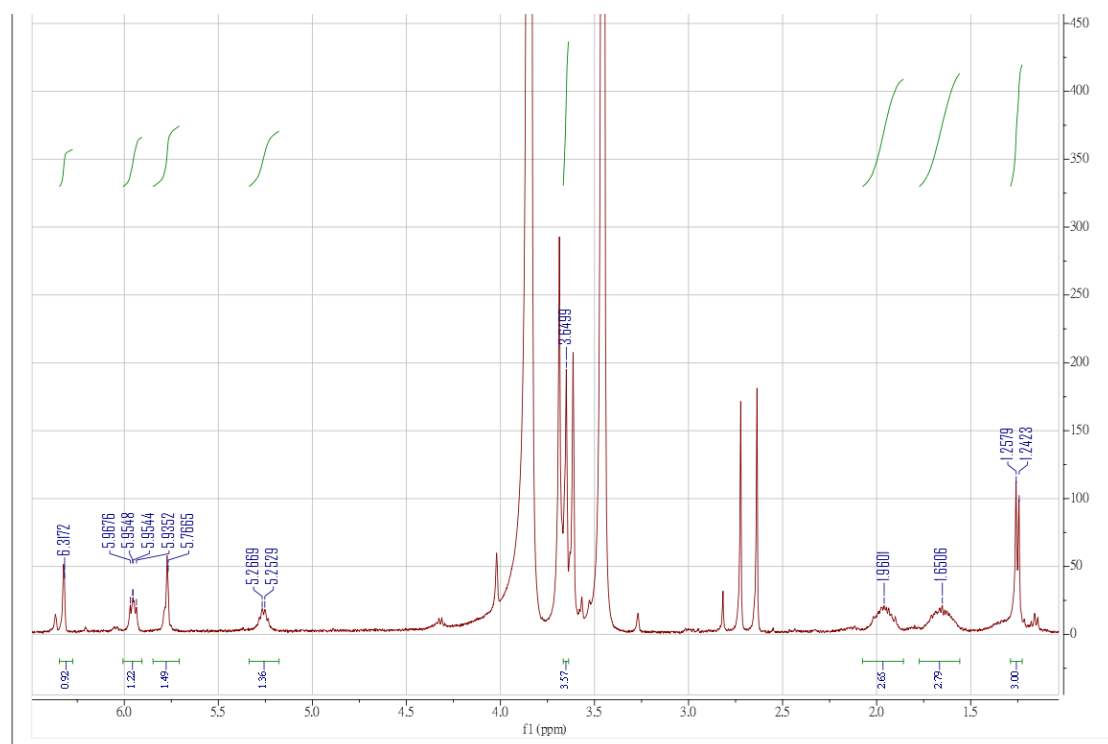

**Figure S79.** The  $^1\text{H}$  NMR (400 MHz,  $\text{C}_5\text{D}_5\text{N}$ ) spectrum of compound 7S, 10R -MTPA ester of 3 (3R)

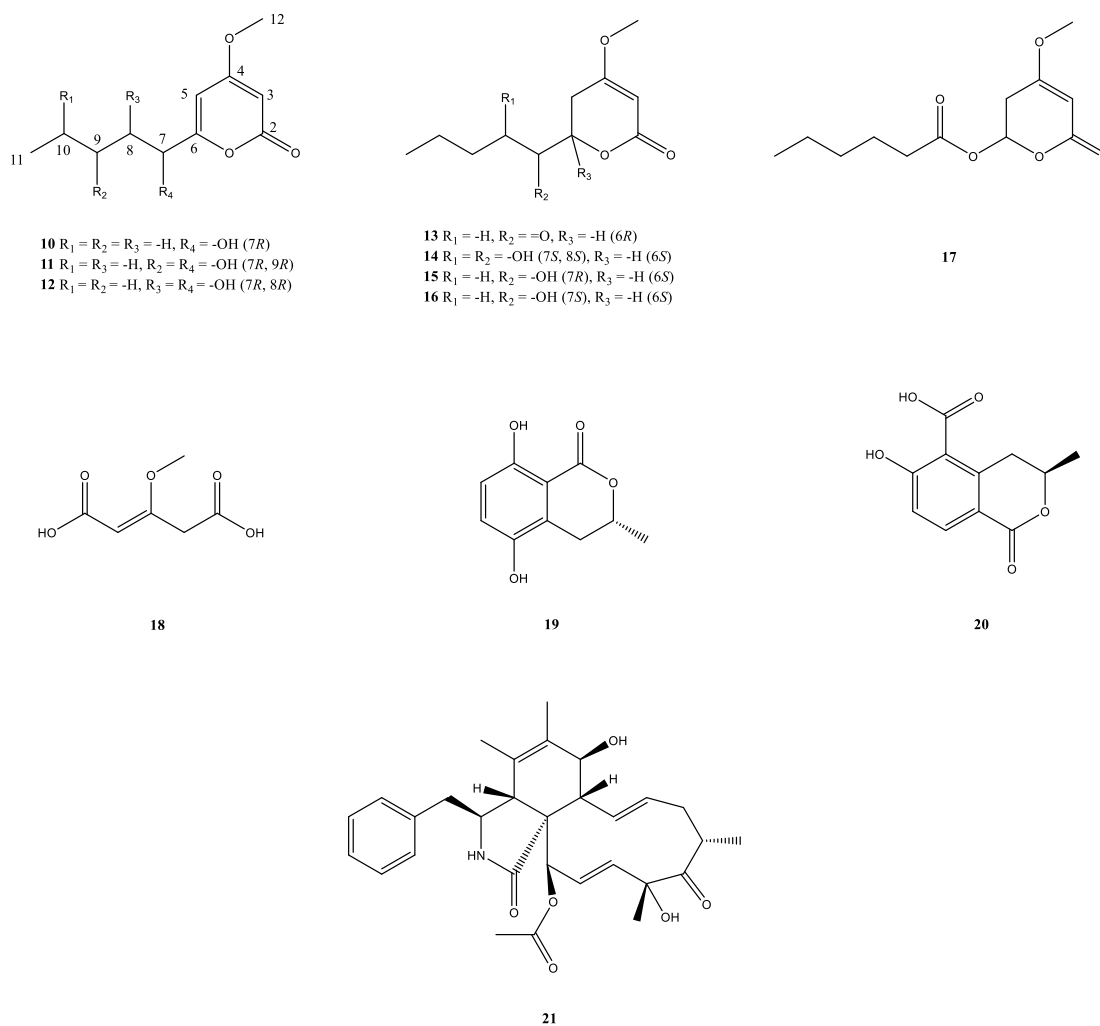

**Figure S80.** Structures of known compounds isolated in this study

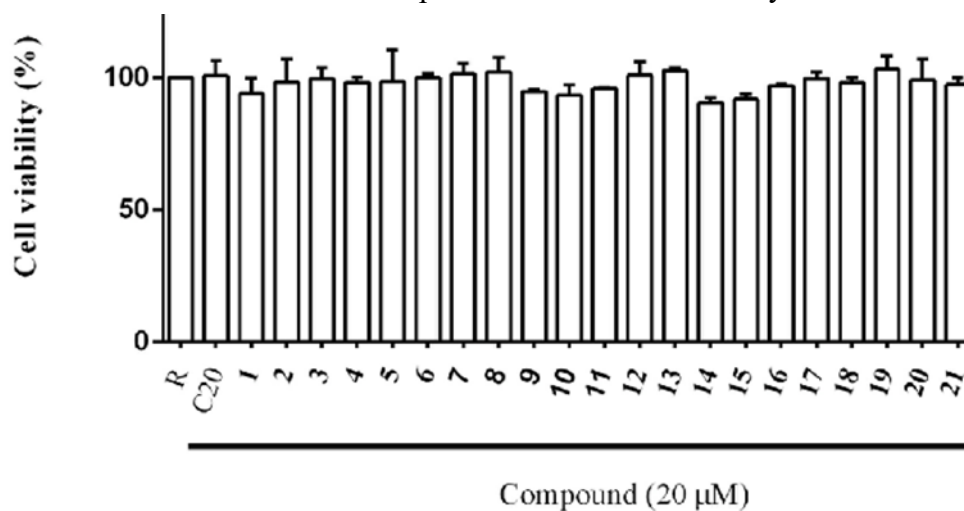

**Figure S81.** All compounds had no cytotoxicity on the BV-2 cells at a concentration of 20  $\mu$ M

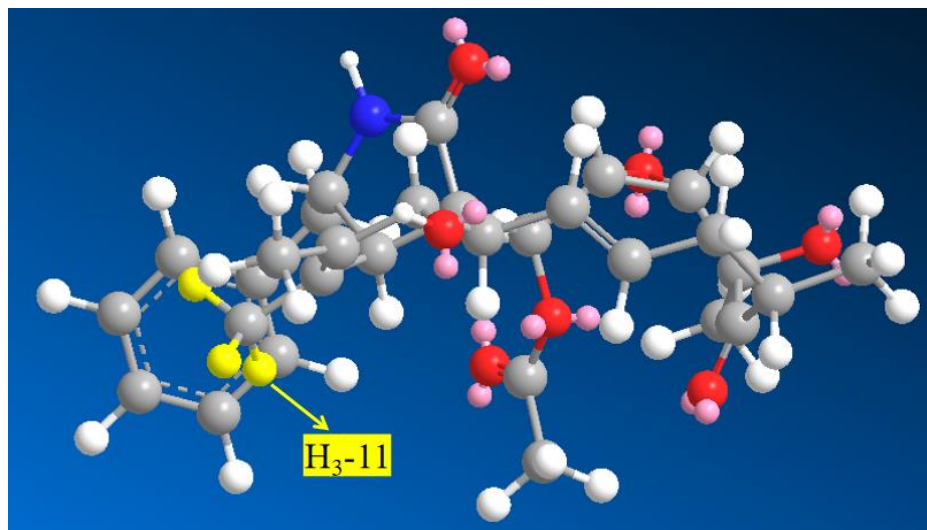

**Figure S82.** ChemBio 3D Ultra 12.0 Molecular modelling of 7.

**Table S1.** Crystal data and experimental details for **6**

| Crystal data                      |                                                 |                   |
|-----------------------------------|-------------------------------------------------|-------------------|
| Empirical formula                 | C <sub>26</sub> H <sub>42</sub> O <sub>10</sub> |                   |
| Formula weight                    | 514.59                                          |                   |
| Crystal system                    | Monoclinic                                      |                   |
| Space group                       | P2 <sub>1</sub>                                 |                   |
| Unit cell dimensions              | a = 12.9573(4) Å                                | α = 90°.          |
|                                   | b = 6.4656(2) Å                                 | β = 91.0625(13)°. |
|                                   | c = 15.2654(5) Å                                | γ = 90°.          |
| Volume                            | 1278.67(7) Å <sup>3</sup>                       |                   |
| Z                                 | 2                                               |                   |
| F(000)                            | 556                                             |                   |
| Density (calculated)              | 1.337 Mg/m <sup>3</sup>                         |                   |
| Wavelength                        | 1.54178 Å                                       |                   |
| Cell parameters reflections used  | 9834                                            |                   |
| Theta range for Cell parameters   | 2.90 to 78.03°.                                 |                   |
| Absorption coefficient            | 0.845 mm <sup>-1</sup>                          |                   |
| Temperature                       | 100(2) K                                        |                   |
| Crystal size                      | 0.200 x 0.100 x 0.050 mm <sup>3</sup>           |                   |
| Data collection                   |                                                 |                   |
| Diffractometer                    | Bruker AXS D8 VENTURE, PhotonIII_C28            |                   |
| Absorption correction             | Semi-empirical from equivalents                 |                   |
| Max. and min. transmission        | 1.0000 and 0.8992                               |                   |
| No. of measured reflections       | 21066                                           |                   |
| No. of independent reflections    | 5233 [R(int) = 0.0306]                          |                   |
| No. of observed [I > 2σ(I)]       | 5142                                            |                   |
| Completeness to theta = 67.679°   | 100.0 %                                         |                   |
| Theta range for data collection   | 2.895 to 78.235°.                               |                   |
| Refinement                        |                                                 |                   |
| Final R indices [I > 2σ(I)]       | R1 = 0.0295, wR2 = 0.0773                       |                   |
| R indices (all data)              | R1 = 0.0301, wR2 = 0.0779                       |                   |
| Goodness-of-fit on F <sup>2</sup> | 1.053                                           |                   |
| No. of reflections                | 5233                                            |                   |
| No. of parameters                 | 336                                             |                   |
| No. of restraints                 | 1                                               |                   |
| Absolute structure parameter      | 0.03(5)                                         |                   |
| Largest diff. peak and hole       | 0.209 and -0.195 e.Å <sup>-3</sup>              |                   |



**Table S2.** Bond lengths [Å] and angles [°] for **6**

---

|             |            |
|-------------|------------|
| O(1)-C(19)  | 1.350(2)   |
| O(1)-C(6)   | 1.4877(19) |
| O(2)-C(9)   | 1.445(2)   |
| O(3)-C(19)  | 1.209(2)   |
| O(4)-C(1')  | 1.402(2)   |
| O(4)-C(16)  | 1.440(2)   |
| O(5)-C(2')  | 1.430(2)   |
| O(6)-C(3')  | 1.421(2)   |
| O(7)-C(4')  | 1.426(2)   |
| O(8)-C(1')  | 1.4267(19) |
| O(8)-C(5')  | 1.440(2)   |
| O(9)-C(6')  | 1.427(2)   |
| C(1)-C(2)   | 1.536(2)   |
| C(1)-C(10)  | 1.541(2)   |
| C(2)-C(3)   | 1.533(2)   |
| C(3)-C(4)   | 1.535(3)   |
| C(4)-C(19)  | 1.518(2)   |
| C(4)-C(5)   | 1.530(2)   |
| C(4)-C(18)  | 1.550(2)   |
| C(5)-C(6)   | 1.516(2)   |
| C(5)-C(10)  | 1.549(2)   |
| C(6)-C(7)   | 1.494(2)   |
| C(1')-C(2') | 1.526(2)   |
| C(2')-C(3') | 1.527(2)   |
| C(3')-C(4') | 1.524(2)   |
| C(4')-C(5') | 1.531(2)   |
| C(5')-C(6') | 1.512(2)   |
| C(7)-C(8)   | 1.335(2)   |
| C(8)-C(14)  | 1.512(2)   |
| C(8)-C(9)   | 1.534(2)   |
| C(9)-C(11)  | 1.534(2)   |
| C(9)-C(10)  | 1.563(2)   |
| C(10)-C(20) | 1.549(2)   |
| C(11)-C(12) | 1.529(2)   |
| C(12)-C(13) | 1.537(2)   |
| C(13)-C(17) | 1.528(3)   |

|                   |            |
|-------------------|------------|
| C(13)-C(14)       | 1.543(2)   |
| C(13)-C(15)       | 1.544(2)   |
| C(15)-C(16)       | 1.520(2)   |
| C(19)-O(1)-C(6)   | 109.07(13) |
| C(1')-O(4)-C(16)  | 112.41(14) |
| C(1')-O(8)-C(5')  | 113.52(13) |
| C(2)-C(1)-C(10)   | 110.55(15) |
| C(3)-C(2)-C(1)    | 113.27(15) |
| C(2)-C(3)-C(4)    | 116.46(15) |
| C(19)-C(4)-C(5)   | 100.50(14) |
| C(19)-C(4)-C(3)   | 117.08(15) |
| C(5)-C(4)-C(3)    | 114.90(14) |
| C(19)-C(4)-C(18)  | 104.62(14) |
| C(5)-C(4)-C(18)   | 111.37(14) |
| C(3)-C(4)-C(18)   | 107.86(14) |
| C(6)-C(5)-C(4)    | 102.04(14) |
| C(6)-C(5)-C(10)   | 110.88(14) |
| C(4)-C(5)-C(10)   | 114.49(14) |
| O(1)-C(6)-C(7)    | 114.26(14) |
| O(1)-C(6)-C(5)    | 103.57(13) |
| C(7)-C(6)-C(5)    | 114.14(14) |
| O(4)-C(1')-O(8)   | 111.73(14) |
| O(4)-C(1')-C(2')  | 108.18(14) |
| O(8)-C(1')-C(2')  | 110.94(14) |
| O(5)-C(2')-C(1')  | 107.01(14) |
| O(5)-C(2')-C(3')  | 110.24(14) |
| C(1')-C(2')-C(3') | 111.37(14) |
| O(6)-C(3')-C(4')  | 111.95(15) |
| O(6)-C(3')-C(2')  | 107.81(14) |
| C(4')-C(3')-C(2') | 111.08(14) |
| O(7)-C(4')-C(3')  | 107.29(14) |
| O(7)-C(4')-C(5')  | 110.98(14) |
| C(3')-C(4')-C(5') | 108.55(14) |
| O(8)-C(5')-C(6')  | 106.22(14) |
| O(8)-C(5')-C(4')  | 108.38(13) |
| C(6')-C(5')-C(4') | 114.87(14) |
| O(9)-C(6')-C(5')  | 109.85(14) |

|                   |            |
|-------------------|------------|
| C(8)-C(7)-C(6)    | 122.16(16) |
| C(7)-C(8)-C(14)   | 120.80(16) |
| C(7)-C(8)-C(9)    | 122.51(15) |
| C(14)-C(8)-C(9)   | 116.49(14) |
| O(2)-C(9)-C(11)   | 104.88(14) |
| O(2)-C(9)-C(8)    | 108.42(13) |
| C(11)-C(9)-C(8)   | 110.58(14) |
| O(2)-C(9)-C(10)   | 111.03(14) |
| C(11)-C(9)-C(10)  | 112.04(13) |
| C(8)-C(9)-C(10)   | 109.76(14) |
| C(1)-C(10)-C(5)   | 106.28(14) |
| C(1)-C(10)-C(20)  | 108.17(14) |
| C(5)-C(10)-C(20)  | 114.25(14) |
| C(1)-C(10)-C(9)   | 113.43(14) |
| C(5)-C(10)-C(9)   | 105.44(13) |
| C(20)-C(10)-C(9)  | 109.36(14) |
| C(12)-C(11)-C(9)  | 113.53(14) |
| C(11)-C(12)-C(13) | 112.15(15) |
| C(17)-C(13)-C(12) | 112.22(15) |
| C(17)-C(13)-C(14) | 108.38(14) |
| C(12)-C(13)-C(14) | 108.02(15) |
| C(17)-C(13)-C(15) | 109.98(15) |
| C(12)-C(13)-C(15) | 110.84(15) |
| C(14)-C(13)-C(15) | 107.22(13) |
| C(8)-C(14)-C(13)  | 114.67(14) |
| C(16)-C(15)-C(13) | 118.16(15) |
| O(4)-C(16)-C(15)  | 109.84(15) |
| O(3)-C(19)-O(1)   | 121.82(17) |
| O(3)-C(19)-C(4)   | 127.69(17) |
| O(1)-C(19)-C(4)   | 110.43(14) |

---

Symmetry transformations used to generate equivalent atoms:

**Table S3.** Crystal data and experimental details for **7**

| Crystal data                      |                                                                                                            |
|-----------------------------------|------------------------------------------------------------------------------------------------------------|
| Empirical formula                 | C <sub>30</sub> H <sub>39</sub> N O <sub>8</sub>                                                           |
| Formula weight                    | 541.62                                                                                                     |
| Crystal system                    | Monoclinic                                                                                                 |
| Space group                       | P2 <sub>1</sub>                                                                                            |
| Unit cell dimensions              | a = 13.1017(11) Å      α = 90°.<br>b = 7.0595(6) Å      β = 93.773(4)°.<br>c = 15.8773(14) Å      γ = 90°. |
| Volume                            | 1465.3(2) Å <sup>3</sup>                                                                                   |
| Z                                 | 2                                                                                                          |
| F(000)                            | 580                                                                                                        |
| Density (calculated)              | 1.228 Mg/m <sup>3</sup>                                                                                    |
| Wavelength                        | 1.54178 Å                                                                                                  |
| Cell parameters reflections used  | 9934                                                                                                       |
| Theta range for Cell parameters   | 2.79 to 78.20°.                                                                                            |
| Absorption coefficient            | 0.727 mm <sup>-1</sup>                                                                                     |
| Temperature                       | 100(2) K                                                                                                   |
| Crystal size                      | 0.400 x 0.030 x 0.020 mm <sup>3</sup>                                                                      |
| Data collection                   |                                                                                                            |
| Diffractometer                    | Bruker AXS D8 VENTURE, PhotonIII_C28                                                                       |
| Absorption correction             | Semi-empirical from equivalents                                                                            |
| Max. and min. transmission        | 1.0000 and 0.8878                                                                                          |
| No. of measured reflections       | 27723                                                                                                      |
| No. of independent reflections    | 5863 [R(int) = 0.0505]                                                                                     |
| No. of observed [I > 2σ(I)]       | 5512                                                                                                       |
| Completeness to theta = 67.679°   | 99.8 %                                                                                                     |
| Theta range for data collection   | 2.789 to 78.765°.                                                                                          |
| Refinement                        |                                                                                                            |
| Final R indices [I > 2σ(I)]       | R1 = 0.0364, wR2 = 0.0911                                                                                  |
| R indices (all data)              | R1 = 0.0406, wR2 = 0.0940                                                                                  |
| Goodness-of-fit on F <sup>2</sup> | 1.066                                                                                                      |
| No. of reflections                | 5863                                                                                                       |
| No. of parameters                 | 362                                                                                                        |
| No. of restraints                 | 1                                                                                                          |
| Absolute structure parameter      | -0.04(9)                                                                                                   |
| Largest diff. peak and hole       | 0.196 and -0.224 e.Å <sup>-3</sup>                                                                         |

**Table S4.** Bond lengths [Å] and angles [°] for **7**

---

|             |          |
|-------------|----------|
| O(1)-C(1)   | 1.237(3) |
| O(2)-C(7)   | 1.428(2) |
| O(3)-C(17)  | 1.217(3) |
| O(4)-C(18)  | 1.415(3) |
| O(5)-C(19)  | 1.450(3) |
| O(5)-C(20)  | 1.459(2) |
| O(6)-C(24)  | 1.350(3) |
| O(6)-C(21)  | 1.447(2) |
| O(7)-C(24)  | 1.204(3) |
| N(1)-C(1)   | 1.334(3) |
| N(1)-C(3)   | 1.457(3) |
| C(1)-C(9)   | 1.533(3) |
| C(3)-C(10)  | 1.539(3) |
| C(3)-C(4)   | 1.567(3) |
| C(4)-C(5)   | 1.511(3) |
| C(4)-C(9)   | 1.563(3) |
| C(5)-C(6)   | 1.336(3) |
| C(5)-C(11)  | 1.513(3) |
| C(6)-C(12)  | 1.509(3) |
| C(6)-C(7)   | 1.519(3) |
| C(7)-C(8)   | 1.543(3) |
| C(8)-C(13)  | 1.509(3) |
| C(8)-C(9)   | 1.549(3) |
| C(9)-C(21)  | 1.554(3) |
| C(10)-C(1') | 1.512(3) |
| C(13)-C(14) | 1.326(3) |
| C(14)-C(15) | 1.508(3) |
| C(15)-C(16) | 1.540(3) |
| C(16)-C(17) | 1.515(3) |
| C(16)-C(22) | 1.538(3) |
| C(17)-C(18) | 1.540(3) |
| C(18)-C(19) | 1.526(3) |
| C(18)-C(23) | 1.529(3) |
| C(19)-C(20) | 1.463(3) |
| C(20)-C(21) | 1.510(3) |
| C(24)-C(25) | 1.495(3) |

|             |          |
|-------------|----------|
| C(1')-C(2') | 1.393(3) |
| C(1')-C(6') | 1.399(3) |
| C(2')-C(3') | 1.393(4) |
| C(3')-C(4') | 1.385(4) |
| C(4')-C(5') | 1.380(5) |
| C(5')-C(6') | 1.392(4) |

|                  |            |
|------------------|------------|
| C(19)-O(5)-C(20) | 60.38(13)  |
| C(24)-O(6)-C(21) | 118.84(17) |
| C(1)-N(1)-C(3)   | 115.55(17) |
| O(1)-C(1)-N(1)   | 124.90(19) |
| O(1)-C(1)-C(9)   | 125.56(18) |
| N(1)-C(1)-C(9)   | 109.54(17) |
| N(1)-C(3)-C(10)  | 111.07(17) |
| N(1)-C(3)-C(4)   | 103.01(16) |
| C(10)-C(3)-C(4)  | 115.65(18) |
| C(5)-C(4)-C(9)   | 116.29(17) |
| C(5)-C(4)-C(3)   | 108.70(17) |
| C(9)-C(4)-C(3)   | 104.80(16) |
| C(6)-C(5)-C(4)   | 123.08(19) |
| C(6)-C(5)-C(11)  | 123.3(2)   |
| C(4)-C(5)-C(11)  | 113.57(18) |
| C(5)-C(6)-C(12)  | 123.93(19) |
| C(5)-C(6)-C(7)   | 120.12(18) |
| C(12)-C(6)-C(7)  | 115.95(18) |
| O(2)-C(7)-C(6)   | 107.74(16) |
| O(2)-C(7)-C(8)   | 109.50(16) |
| C(6)-C(7)-C(8)   | 111.36(17) |
| C(13)-C(8)-C(7)  | 109.82(17) |
| C(13)-C(8)-C(9)  | 116.39(17) |
| C(7)-C(8)-C(9)   | 109.29(16) |
| C(1)-C(9)-C(8)   | 111.13(16) |
| C(1)-C(9)-C(21)  | 109.75(16) |
| C(8)-C(9)-C(21)  | 112.47(16) |
| C(1)-C(9)-C(4)   | 103.48(16) |
| C(8)-C(9)-C(4)   | 112.03(16) |
| C(21)-C(9)-C(4)  | 107.56(16) |
| C(1')-C(10)-C(3) | 112.26(17) |

|                   |            |
|-------------------|------------|
| C(14)-C(13)-C(8)  | 123.9(2)   |
| C(13)-C(14)-C(15) | 124.4(2)   |
| C(14)-C(15)-C(16) | 113.89(18) |
| C(17)-C(16)-C(22) | 108.03(19) |
| C(17)-C(16)-C(15) | 109.36(18) |
| C(22)-C(16)-C(15) | 110.67(19) |
| O(3)-C(17)-C(16)  | 121.2(2)   |
| O(3)-C(17)-C(18)  | 117.7(2)   |
| C(16)-C(17)-C(18) | 121.1(2)   |
| O(4)-C(18)-C(19)  | 109.36(18) |
| O(4)-C(18)-C(23)  | 109.49(19) |
| C(19)-C(18)-C(23) | 109.06(19) |
| O(4)-C(18)-C(17)  | 108.34(19) |
| C(19)-C(18)-C(17) | 109.25(17) |
| C(23)-C(18)-C(17) | 111.32(19) |
| O(5)-C(19)-C(20)  | 60.10(13)  |
| O(5)-C(19)-C(18)  | 112.88(17) |
| C(20)-C(19)-C(18) | 121.05(19) |
| O(5)-C(20)-C(19)  | 59.52(13)  |
| O(5)-C(20)-C(21)  | 112.15(17) |
| C(19)-C(20)-C(21) | 124.21(19) |
| O(6)-C(21)-C(20)  | 108.81(17) |
| O(6)-C(21)-C(9)   | 107.31(15) |
| C(20)-C(21)-C(9)  | 118.09(17) |
| O(7)-C(24)-O(6)   | 123.7(2)   |
| O(7)-C(24)-C(25)  | 125.7(2)   |
| O(6)-C(24)-C(25)  | 110.6(2)   |
| C(2')-C(1')-C(6') | 118.8(2)   |
| C(2')-C(1')-C(10) | 121.3(2)   |
| C(6')-C(1')-C(10) | 119.8(2)   |
| C(3')-C(2')-C(1') | 120.2(2)   |
| C(4')-C(3')-C(2') | 120.3(3)   |
| C(5')-C(4')-C(3') | 120.2(2)   |
| C(4')-C(5')-C(6') | 119.8(3)   |
| C(5')-C(6')-C(1') | 120.7(2)   |

---

Symmetry transformations used to generate equivalent atoms:
